# Supplementary material for: Dehydrogenation and oxidative coupling of alcohol and amines catalyzed by organosilicon-supported TiO2@PMHSIPN
Source: Royal Society of Chemistry journal article supplement (doi:10.1039/c4ra06685e), 2014-08-01

## Supporting Information

### Dehydrogenation and Oxidative Coupling of Alcohol and Amines Catalyzed by Organosilicon-supported **TiO<sub>2</sub>@PMHSIPN**

Hu Wang<sup>†a</sup>, Jin Zhang<sup>†a</sup>, Yu-Ming Cui<sup>a</sup>, Ke-Fang Yang<sup>\*a</sup>, Zhan-Jiang Zheng<sup>a</sup>, and  
Li-Wen Xu<sup>\*a,b</sup>

<sup>a</sup> Key Laboratory of Organosilicon Chemistry and Material Technology of Ministry of Education, Hangzhou Normal University, Hangzhou 310012, P. R. China. Fax: 86 2886 5135; Tel: 86 2886 5135; E-mail: [liwenxu@hznu.edu.cn](mailto:liwenxu@hznu.edu.cn)

<sup>b</sup> State Key Laboratory for Oxo Synthesis and Selective Oxidation, Lanzhou Institute of Chemical Physics, Chinese Academy of Sciences, Lanzhou, 730000, P. R. China; E-mail: [licpxulw@yahoo.com](mailto:licpxulw@yahoo.com)

### Table of Contents

|                                                                                     |   |
|-------------------------------------------------------------------------------------|---|
| General Experimental Methods .....                                                  | 1 |
| Experimental procedure for preparation of catalyst.....                             | 2 |
| Experimental procedure for oxidant-free alcohol dehydrogenation.....                | 3 |
| Characterization data of the products.....                                          | 5 |
| References.....                                                                     | 8 |
| <sup>1</sup> H , <sup>13</sup> C NMR, IR and GC spectra for all new compounds ..... | 9 |

## **Experimental Section**

### **1. General remarks**

All the chemicals were of analytic reagent grade and were used as received without further purification. AP-grade methyl acrylate,  $\text{Co}(\text{OAc})_2$ , TsOH, and chloroform were used as received. The molecular weight of PMHS was about 8684 g/mol. Attenuated total reflection Fourier transform infrared (ATR-FTIR) spectroscopy was performed on VERTEX70 IR (Bruker). The data were collected over 32 scans with a resolution of  $4\text{ cm}^{-1}$  at room temperature. The morphology of the polymer fracture surface was characterized by scanning electron micrograph (SEM, Hitachi S3000N). Transmission electron microscopy (TEM) was carried out with the phosphotungstic acid staining method on a Hitachi H-7650 transmission electron microscope. Flash column chromatography was performed over silica (200-300 mesh).  $^1\text{H}$ -NMR and  $^{13}\text{C}$ -NMR spectra were recorded at 400, 500 and 100, 125 MHz, respectively on Advance (Bruker) 400 MHz Nuclear Magnetic Resonance Spectrometer, and were referenced to the internal solvent signals. Thin layer chromatography was performed using silica gel; GF254 TLC plates and visualized with ultraviolet light. The product was confirmed by GC-MS, and usual spectroscopic methods (NMR).

### **2. Synthesis of PMHS/PA semi-IPN material (PMHS-based semi-interpenetrating networks, PMHSIPN)<sup>[1]</sup>**

In a typical reaction, a PMHS/PEA semi-IPN was prepared as follows: ethyl acrylate (1.07 g), PMHS (2.01 g), TsOH (0.0184 g) and  $\text{Co}(\text{OAc})_2$  (0.026 g) were mixed in a reactor and stirred for 24 h at 70 °C. The resulting mixture was washed with the distilled water and dried for 24 h at 60 °C under vacuum.

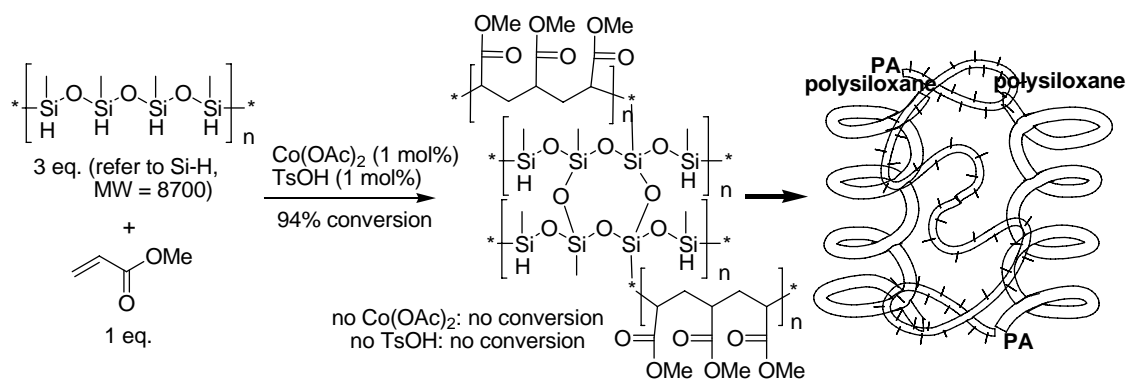

Scheme S1.

### 3. Synthesis of TiO<sub>2</sub>@PMHSIPN Catalyst<sup>[2]</sup>

According to previous report<sup>[2]</sup>, to a solution of PMHS/PEA semi-IPN (3 g, 25 mmol, calculated on the Si-H hydrogen content) dissolved in THF under nitrogen atmosphere, Ti(O*i*-Pr)<sub>4</sub> (25 mmol, 7.38 mL) was added dropwise, and stirred for 3 hours. Then the solvent was concentrated in vacuo, the residue was dried for 12 h at 60 °C under vacuum. After that, the HNO<sub>3</sub> aqueous solution (1 %, 25 mL) was added and stirred for a period of time, filtration, dried and then the faint yellow powder was obtained.

### 4. General Procedure for the Oxidation reaction/dehydrogenation of benzyl alcohol catalyzed by TiO<sub>2</sub>@PMHSIPN

4-Methylbenzyl alcohol (**1g**, 1 mmol), TiO<sub>2</sub>@PMHSIPN (2 mol% Ti), K<sub>2</sub>CO<sub>3</sub> (20 mol%), 5-chloro-1-indanone (**3f**, 20 mol%), and 3 mL nitrobenzene were added into a 15 mL Schlenk tube under nitrogen, and stirred at 160 °C for 15 h. The mixture was extracted with 3×3 mL of ethyl acetate. The combined organic layer was dried with anhydrous sodium sulfate and concentrated by rotary evaporation. The residue was purified by flash column chromatography (10:1 hexanes and ethyl acetate) to give **2g** with 99% of yield. In this reaction, all the products were known<sup>[3]</sup> and have been confirmed by GC-MS, IR, and NMR.

## **5. General Procedure for the oxidative coupling of amines with alcohols catalyzed by TiO<sub>2</sub>@PMHSIPN**

*o*-Toluidine (**6a**, 1 mmol), benzyl alcohol (**1a**, 5 eq.), TiO<sub>2</sub>@PMHSIPN (2 mol% Ti), and K<sub>2</sub>CO<sub>3</sub> (20 mol%), were added into a 15 mL Schlenk tube under nitrogen, and then, were stirred at 160 °C for 12 h. The mixture was extracted by 3×3 mL of ethyl acetate. The extraction was dried with anhydrous sodium sulfate and concentrated by rotary evaporation. The residue was purified by recrystallization in ethanol to give **7a** with 99% of yield. In this TiO<sub>2</sub>@PMHSIPN-catalyzed dehydrogenation-initiated of oxidative coupling of amines with benzyl alcohol, all the products were known<sup>[4]</sup> and have been confirmed by GC-MS, IR, and NMR.

## **6. General Procedure for the oxidative coupling of TsNH<sub>2</sub> with alcohols catalyzed by TiO<sub>2</sub>@PMHSIPN**

*p*-Toluenesulfonamide (**8a**, 1 mmol), benzyl alcohol (**1a**, 5 eq.), TiO<sub>2</sub>@PMHSIPN (2 mol% Ti), and K<sub>2</sub>CO<sub>3</sub> (20 mol%), were added into a 15 mL Schlenk tube under nitrogen. And then the reaction mixture were stirred at 160 °C for 12 h. The mixture was extracted by 3×3 mL of ethyl acetate. The extraction was dried with anhydrous sodium sulfate and concentrated by rotary evaporation. The residue was purified by recrystallization in ethanol to give **9a** with 99% of yield. In this TiO<sub>2</sub>@PMHSIPN-catalyzed dehydrogenation-initiated of oxidative coupling of Ts-NH<sub>2</sub> with benzyl alcohol, all the products were known and have been confirmed by GC-MS, IR, and NMR.

## **7. General Procedure for the oxidative coupling of benzyl alcohol and benzene-1,2-diamine catalyzed by TiO<sub>2</sub>@PMHSIPN**

*o*-Phenylenediamine (**10a**, 1 mmol), benzyl alcohol (**1a**, 5 eq.), TiO<sub>2</sub>@PMHSIPN (2 mol% Ti), and K<sub>2</sub>CO<sub>3</sub> (20 mol%), were added into a 15 mL Schlenk tube under nitrogen. And then the reaction mixture were stirred at 160 °C for 12h. The mixture

was extracted by 3×3 mL of ethyl acetate. The extraction was dried with anhydrous sodium sulfate and concentrated by rotary evaporation. The residue was purified by flash column (5:1 hexanes and ethyl acetate) to give **11a** with 72% of yield. In this oxidative coupling of benzyl alcohol and benzene-1,2-diamine catalyzed by TiO<sub>2</sub>@PMHSIPN, all the products were known<sup>[5]</sup> and have been confirmed by GC-MS, IR, and NMR.

## The characterization data of the representative compounds

### 7, 11, 13

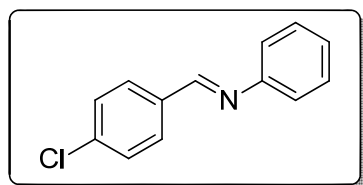

A white solid, 99% Yield. <sup>1</sup>H-NMR (500 MHz, CDCl<sub>3</sub>) : δ = 8.31 (s, 1H), 7.75 (m, 2H), 7.37 (d, J = 8.4 Hz, 2H), 7.33-7.37 (m, 4H), 7.15-7.21 (m, 3H); <sup>13</sup>C-NMR (CDCl<sub>3</sub>, 125 MHz): 158.7, 151.8, 137.4, 134.9, 130.1, 129.3, 129.1, 126.3, 121.0 ; IR (ν<sub>max</sub>/cm<sup>-1</sup>): 3081.1, 2875.9, 2570.7, 1944.3, 1908.3, 1880.6, 1703.0, 1490.5, 1189.4, 1168.5, 1012.8, 733.6, 710.2, 649.0.

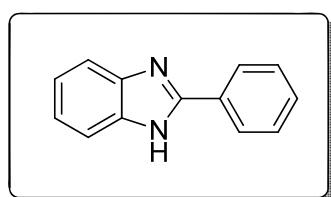

**11a**: A white solid, 72% Yield. <sup>1</sup>H-NMR (400 MHz, CD<sub>3</sub>OD) : δ = 8.09 (d, J = 6.8 Hz, 2H), 7.60 (m, 2H), 7.51 (m, 3H), 7.25 (m, 2H), 4.90 (s, 1H) ; <sup>13</sup>C-NMR (CD<sub>3</sub>OD, 100 MHz): 153.4, 131.4, 131.1, 130.1, 127.8, 123.9, 115.9 ; IR (ν<sub>max</sub>/cm<sup>-1</sup>): 3105.9, 2180.6, 2097.2, 1523.7, 1462.9, 1412.8, 1310.8, 1276.1, 1224.2, 1112.7, 966.2, 745.3, 704.1.

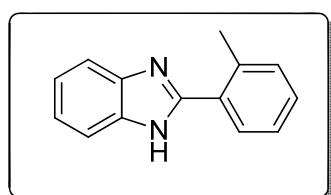

**11b:** A white solid, 93% Yield.  $^1\text{H-NMR}$  (400 MHz,  $\text{CD}_3\text{OD}$ ) :  $\delta = 7.87$  (t,  $J = 8.8$  Hz, 2H), 7.58 (m, 2H), 7.36 (m, 1H), 7.23 (m, 3H), 5.08 (s, 1H), 2.38 (s, 3H);  $^{13}\text{C-NMR}$  ( $\text{CD}_3\text{OD}$ , 125 MHz): 152.1, 138.6, 130.6, 129.5, 128.6, 127.0, 123.6, 122.4, 114.4, 20.1; IR ( $\nu_{\text{max}}/\text{cm}^{-1}$ ): 3052.1, 2922.8, 2791.4, 2358.9, 1590.8, 1539.3, 1558.2, 1471.5, 1446.1, 1433.3, 1314.2, 1275.3, 974.8, 764.8, 742.6, 720.3.

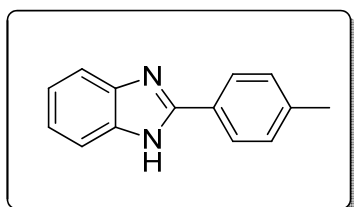

**11c:** A white solid, 84% Yield.  $^1\text{H-NMR}$  (400 MHz,  $\text{CD}_3\text{OD}$ ) :  $\delta = 7.97$  (d,  $J = 8.0$  Hz, 2H), 7.58 (m, 2H), 7.35 (d,  $J=8.4\text{Hz}$ , 2H), 7.24 (m, 2H), 4.85 (s, 1H), 2.41 (s, 3H);  $^{13}\text{C-NMR}$  ( $\text{CD}_3\text{OD}$ , 125 MHz): 152.2, 140.5, 129.3, 126.8, 126.4, 122.4, 20.0; IR ( $\nu_{\text{max}}/\text{cm}^{-1}$ ): 3647.7, 1716.5, 1683.4, 1652.5, 1635.4, 1456.5, 1418.5, 1270.1, 1119.7, 948.3, 818.7, 764.0, 740.7, 613.0, 529.9.

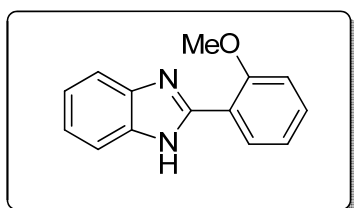

**11d:** A white solid, 78% Yield.  $^1\text{H-NMR}$  (400 MHz,  $\text{CD}_3\text{OD}$ ) :  $\delta = 8.24$  (m, 1H), 7.63 (m, 2H), 7.45 (m, 1H), 7.24 (m, 2H), 7.17 (d,  $J = 8.4$  Hz, 1H), 7.10 (t,  $J = 7.6$  Hz, 1H), 4.92 (s, 1H), 4.02 (s, 3H);  $^{13}\text{C-NMR}$  ( $\text{CD}_3\text{OD}$ , 125 MHz): 157.3, 149.7, 138.0, 131.4, 129.6, 122.3, 120.8, 117.6, 114.5, 111.5, 54.9; IR ( $\nu_{\text{max}}/\text{cm}^{-1}$ ): 3428.6, 3244.6, 3063.2, 2936.4, 1504.3, 1584.2, 1558.3, 1437.5, 1278.9, 1162.7, 1121.1, 1091.1, 1023.3, 747.8.

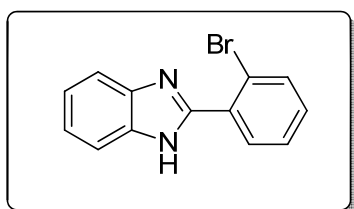

**11f:** A white solid, 69% Yield.  $^1\text{H-NMR}$  (400 MHz,  $\text{CD}_3\text{OD}$ ) :  $\delta = 7.67$  (d,  $J = 8.0$  Hz, 1H), 7.60 (m, 1H), 7.52 (m, 2H), 7.40 (t,  $J = 7.6\text{Hz}$ , 1H), 7.32 (m, 1H), 7.19 (m, 2H),

4.78 (s, 1H);  $^{13}\text{C}$ -NMR ( $\text{CD}_3\text{OD}$ , 125 MHz): 151.0, 133.3, 132.1, 131.8, 131.2, 127.4, 122.6, 121.9, 114.7; IR ( $\nu_{\text{max}}/\text{cm}^{-1}$ ): 3056.4, 1868.2, 1834.9, 1733.4, 1716.4, 1533.2, 1521.4, 1488.8, 1472.3, 1456.6, 1436.6, 1272.0, 1025.9, 742.5.

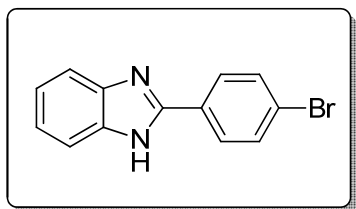

**11g:** A white solid, 68% Yield.  $^1\text{H}$ -NMR (400 MHz,  $\text{CD}_3\text{OD}$ ) :  $\delta$  = 7.89 (m, 2H), 7.60 (m, 2H), 7.50 (m, 2H), 7.17 (m, 2H), 4.74 (s, 1H);  $^{13}\text{C}$ -NMR ( $\text{CD}_3\text{OD}$ , 125 MHz): 150.9, 132.0, 128.8, 128.1, 124.1, 122.8; IR ( $\nu_{\text{max}}/\text{cm}^{-1}$ ): 3468.9, 1558.6, 1540.8, 1553.0, 1521.7, 1489.1, 1473.0, 1457.3, 1416.7, 1261.8, 1069.5, 1009.9, 741.7.

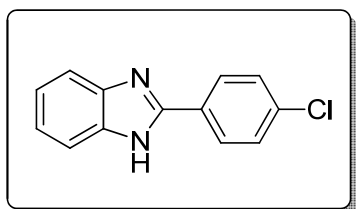

**11h:** A white solid, 84% Yield.  $^1\text{H}$ -NMR (400 MHz,  $\text{CD}_3\text{OD}$ ) :  $\delta$  = 8.06 (m, 2H), 7.61 (m, 2H), 7.56 (m, 2H), 7.27 (m, 2H), 4.84 (s, 1H);  $^{13}\text{C}$ -NMR ( $\text{CD}_3\text{OD}$ , 125 MHz): 150.8, 135.9, 128.9, 128.4, 127.9, 122.7; IR ( $\nu_{\text{max}}/\text{cm}^{-1}$ ): 3446.3, 3053.5, 2851.0, 2205.4, 2118.4, 1667.2, 1573.6, 1469.0, 1420.1, 1274.3, 1224.6, 1016.5, 832.3, 746.3.

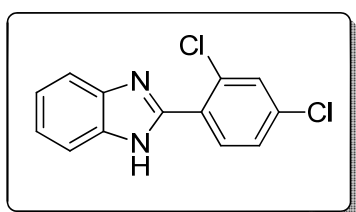

**11i:** A white solid, 53% Yield.  $^1\text{H}$ -NMR (400 MHz,  $\text{CD}_3\text{OD}$ ) :  $\delta$  = 7.82 (d,  $J$  = 8.4 Hz, 1H), 7.69 (d,  $J$  = 2.0 Hz, 1H), 7.65 (m, 2H), 7.50 - 7.53 (dd,  $J$  = 2.0 Hz, 1H), 7.31 (m, 2H), 4.76 (s, 1H);  $^{13}\text{C}$ -NMR ( $\text{CD}_3\text{OD}$ , 125 MHz): 148.6, 136.4, 133.4, 132.7, 129.9, 128.3, 127.4, 122.9, 114.8; IR ( $\nu_{\text{max}}/\text{cm}^{-1}$ ): 3058.5, 2128.8, 1684.1, 1506.0, 1487.3, 1359.1, 1187.6, 1104.2, 962.1, 924.4, 872.9, 860.1, 742.5.

## References

- [1] a) K. F. Yang, L. W. Xu, H. Wang, Faming Zhuanli Shenqing (Chinese Patent), CN 103289267, 2013. b) The polymethylhydrosiloxane (PMHS)-based semi-interpenetrating networks (PMHSIPN) was also a good supporter for palladium catalysis: H. Wang, L. Li, X. F. Bai, W. H. Deng, Z. J. Zheng, K. F. Yang, L. W. Xu, *Green Chem.* 2013, **15**, 2349-2355.
- [2] H. Wang, K. F. Yang, L. Li, Y. Bai, Z. J. Zheng, W. Q. Zhang, L. W. Xu, *ChemCatChem* 2014, **6**, 580-591.
- [3] R. K. Marella, C. K. P. Neeli, S. R. R. Kamaraju, D. R. Burri, *Catal. Sci. Tech.* 2012, **2**, 1833-1838.
- [4] a) Y. S. Lan, B. S. Liao, Y. H. Liu, S. M. Peng, S. T. Liu, *Eur. J. Org. Chem.* 2013, 5160-5164; b) L. Tang, H. Sun, Y. Li, Z. Zha, Z. Wang, *Green Chem.* 2012, **14**, 3423-3428.
- [5] a) Y. Shiraishi, Y. Sugano, S. Tanaka, T. Hirrai, *Angew. Chem. Int. Ed.* 2010, **49**, 1656-1660; b) G. Li, J. Wang, B. Yuan, D. Zhang, Z. Lin, P. Li, H. Huang, *Tetrahedron Lett.* 2013, **54**, 6934-6936.



## 8. NMR and GC-MS of representative products

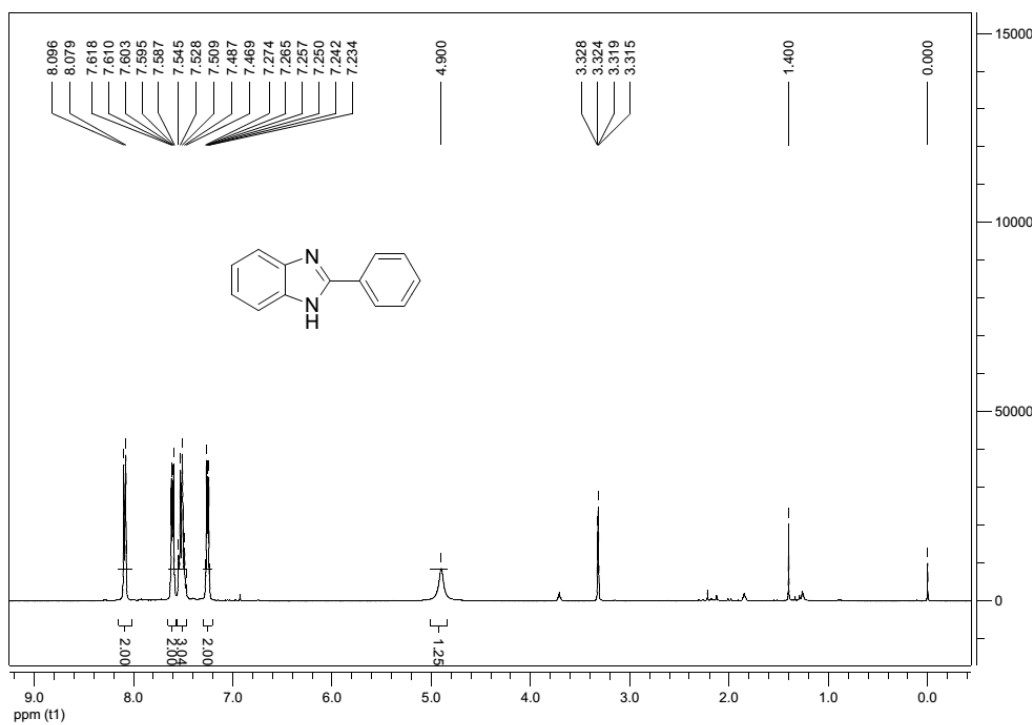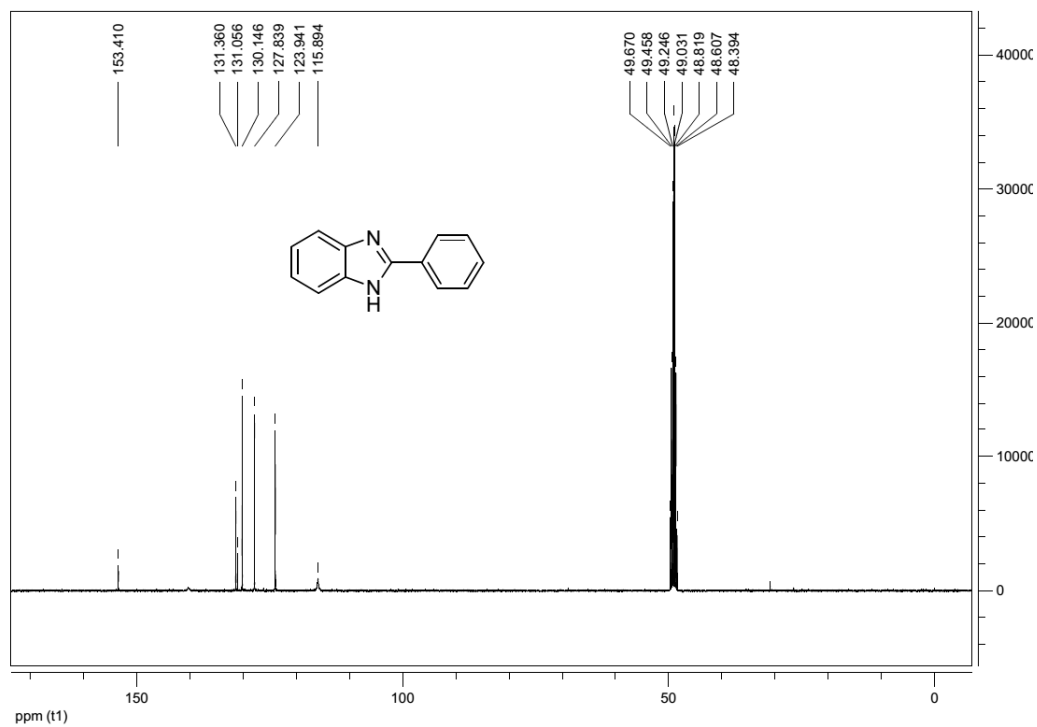

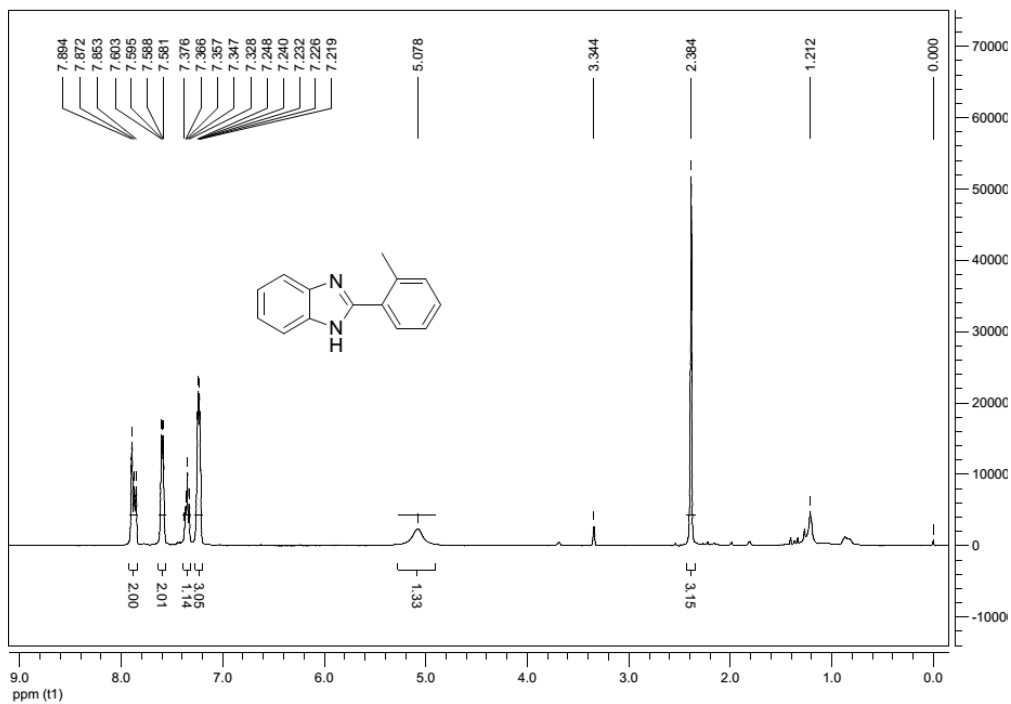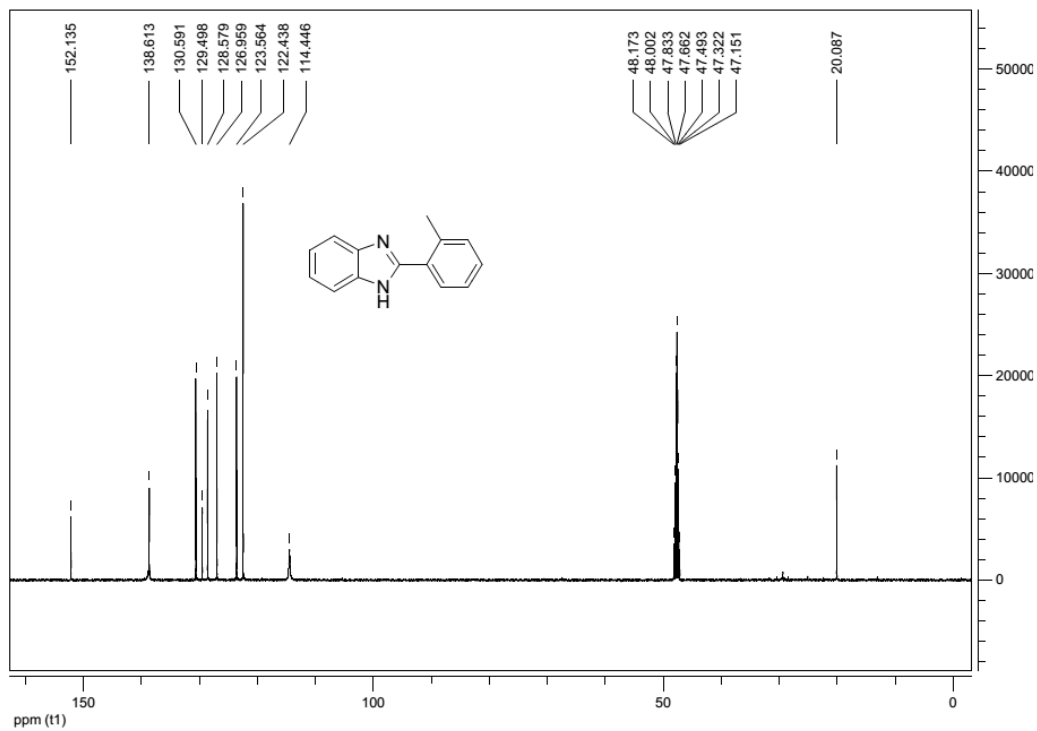

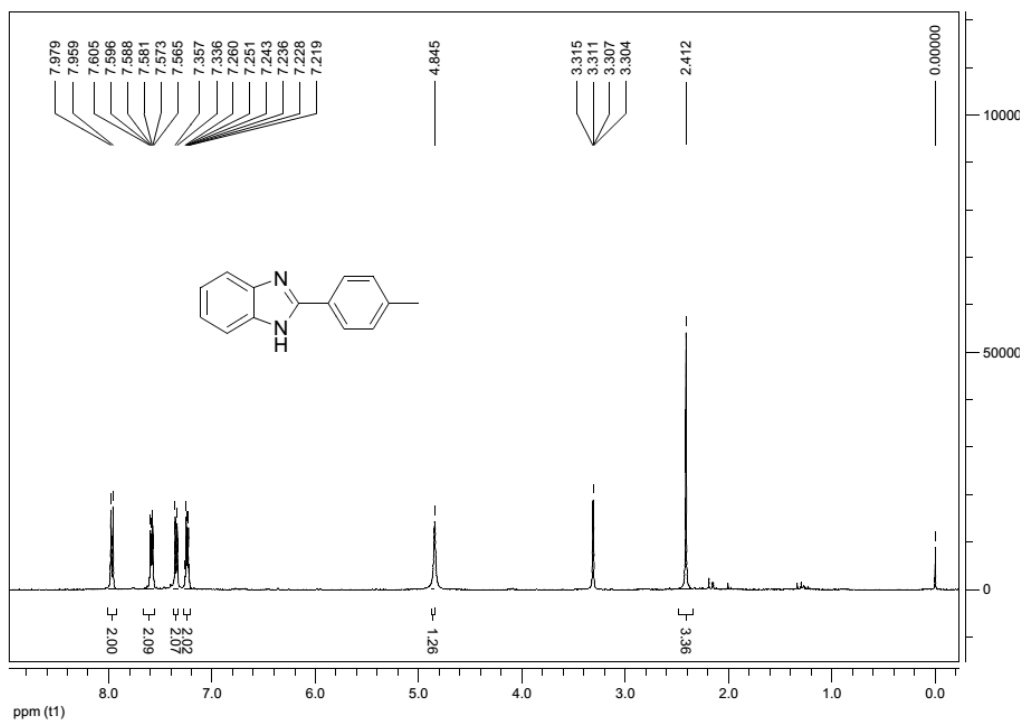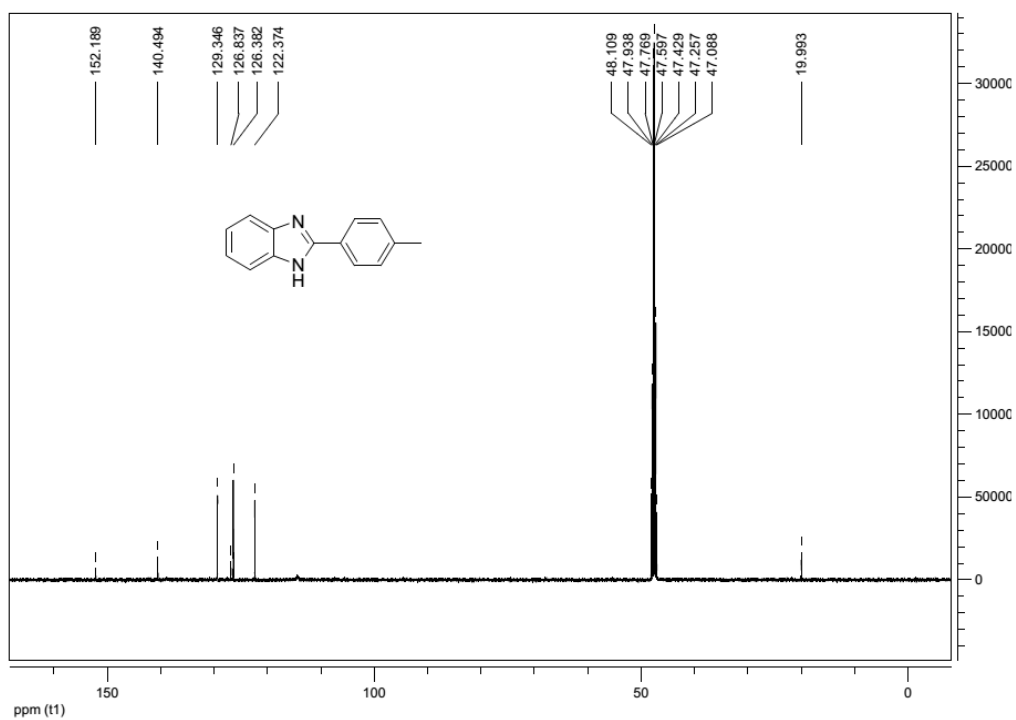

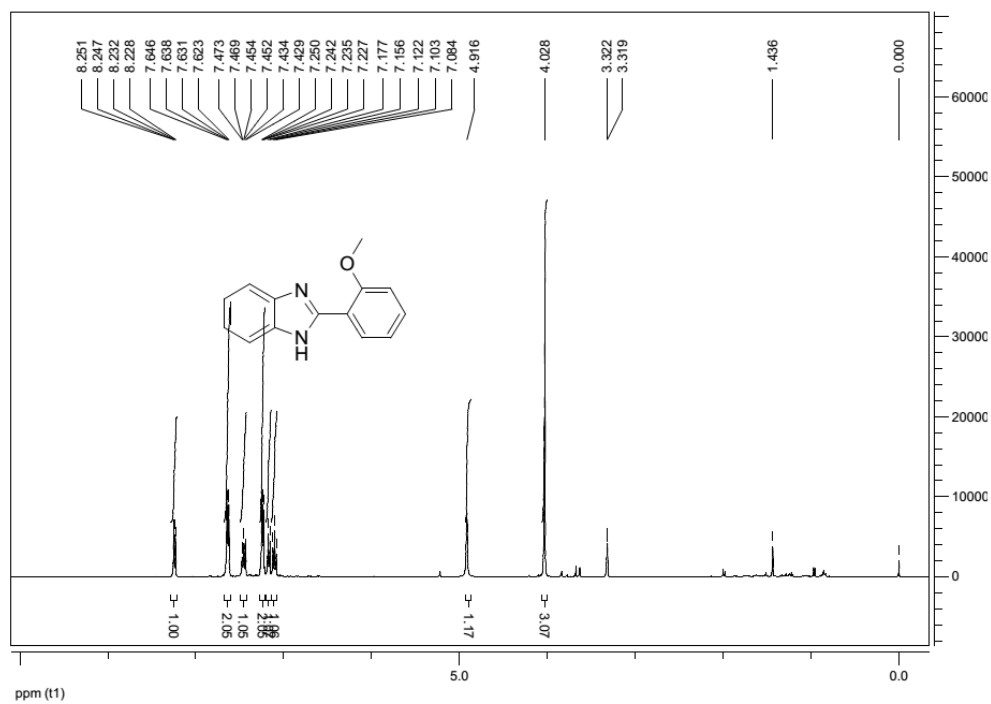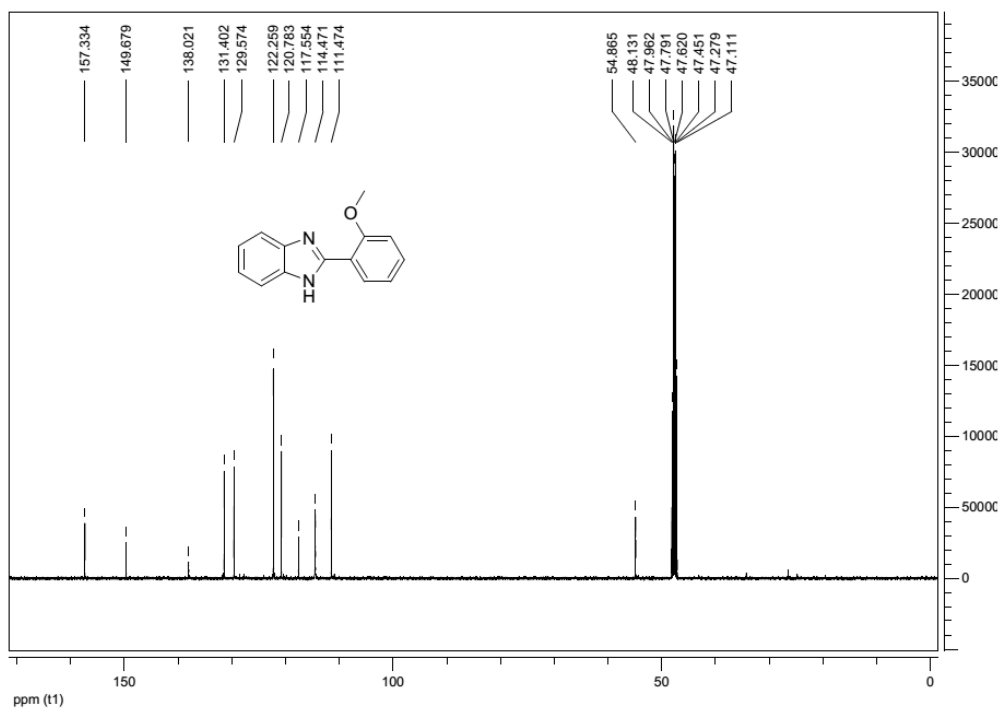



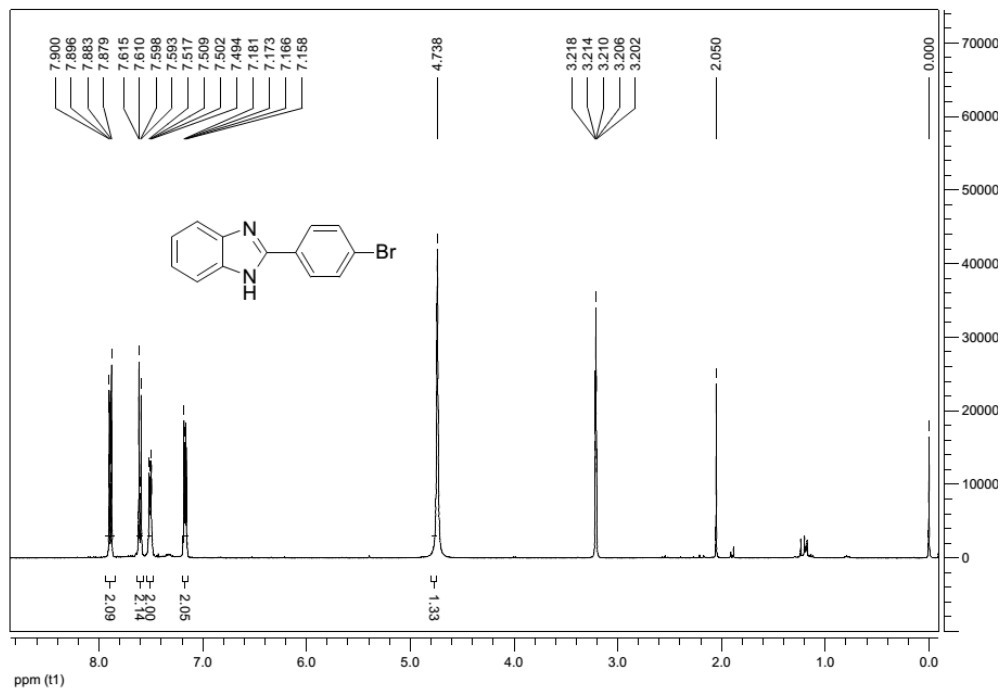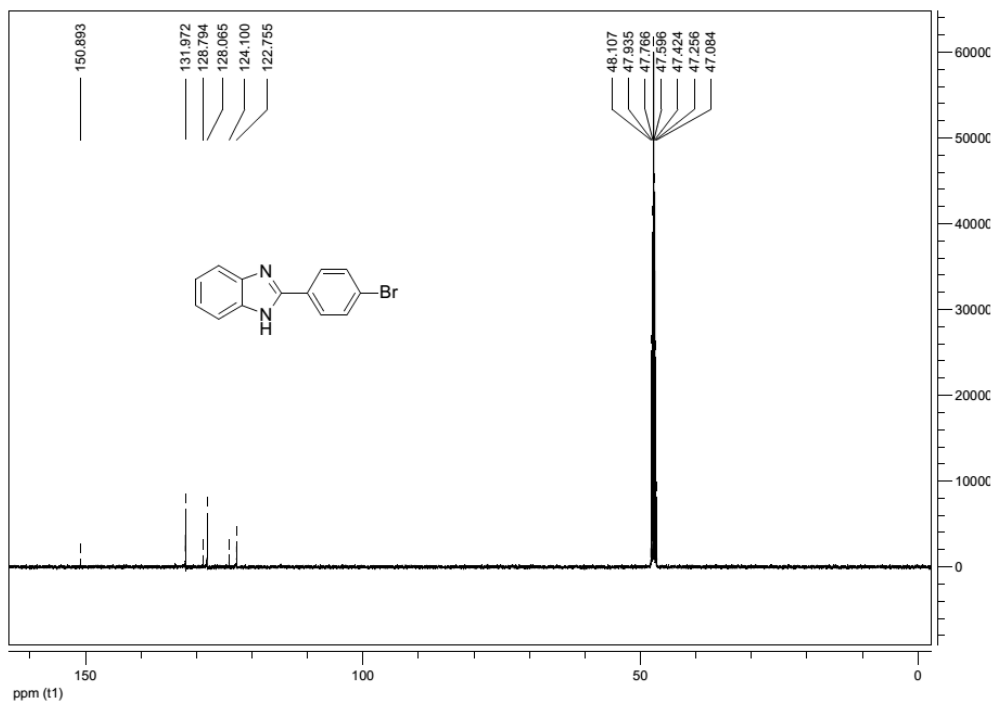

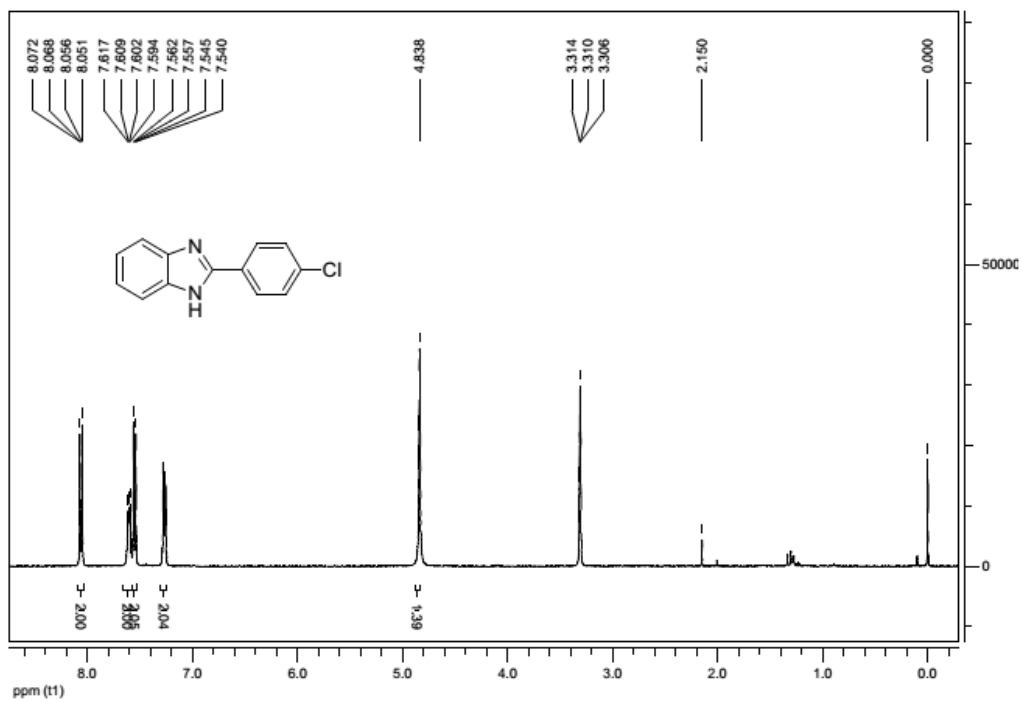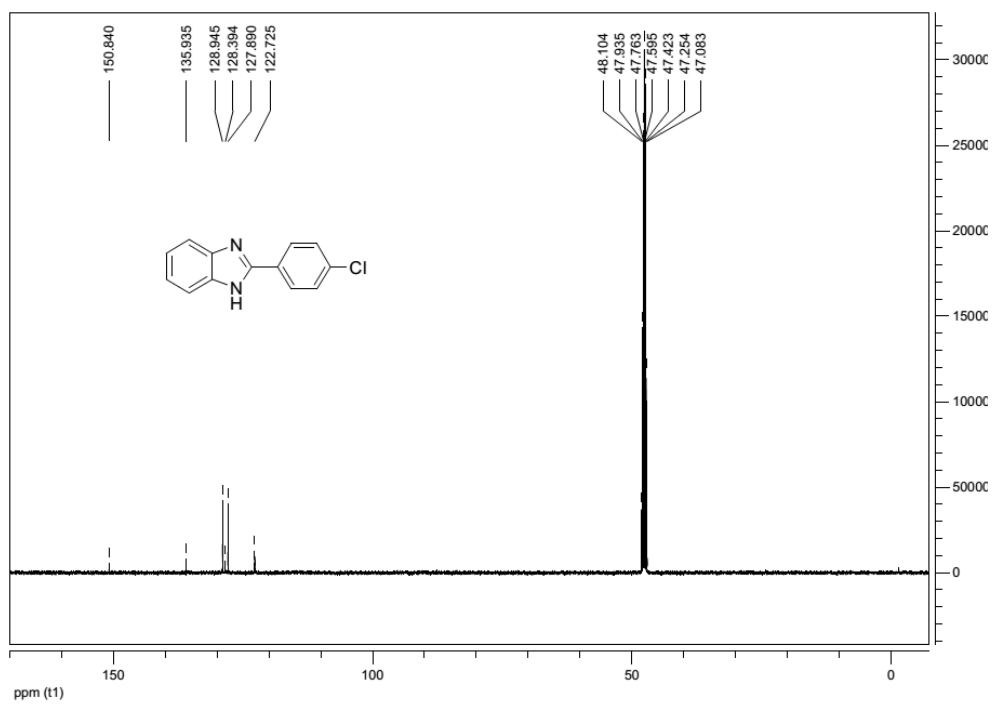

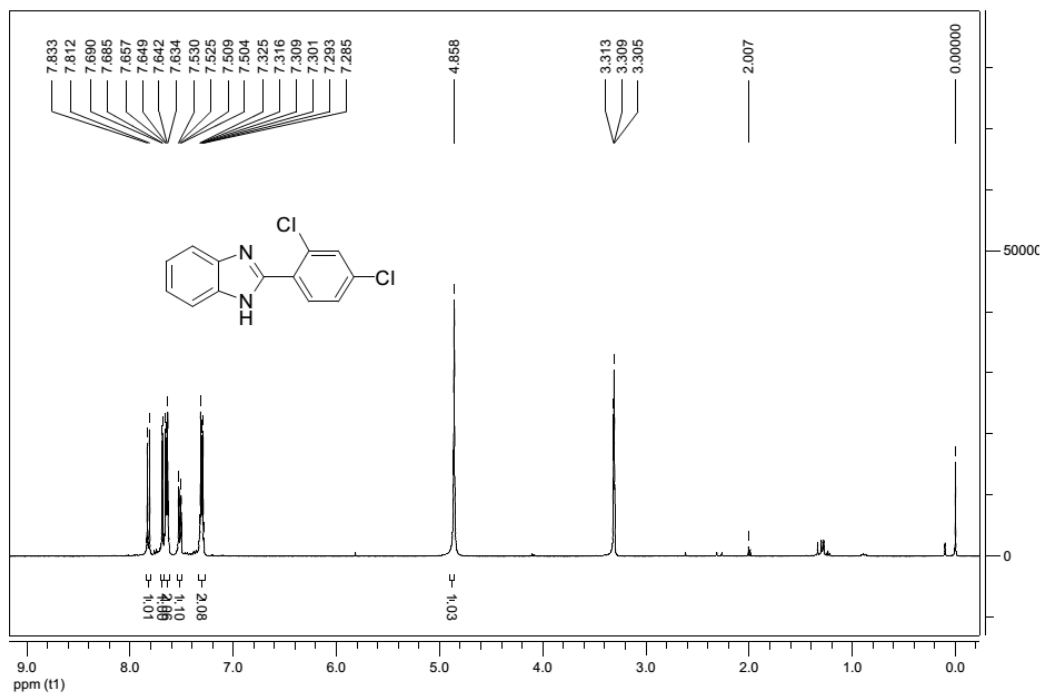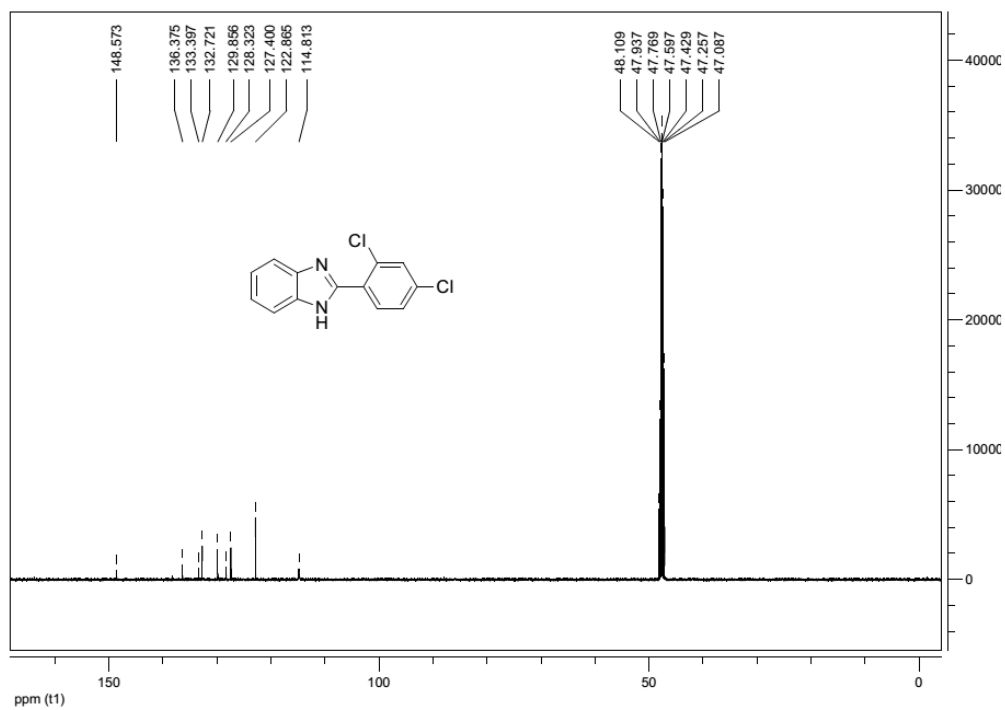



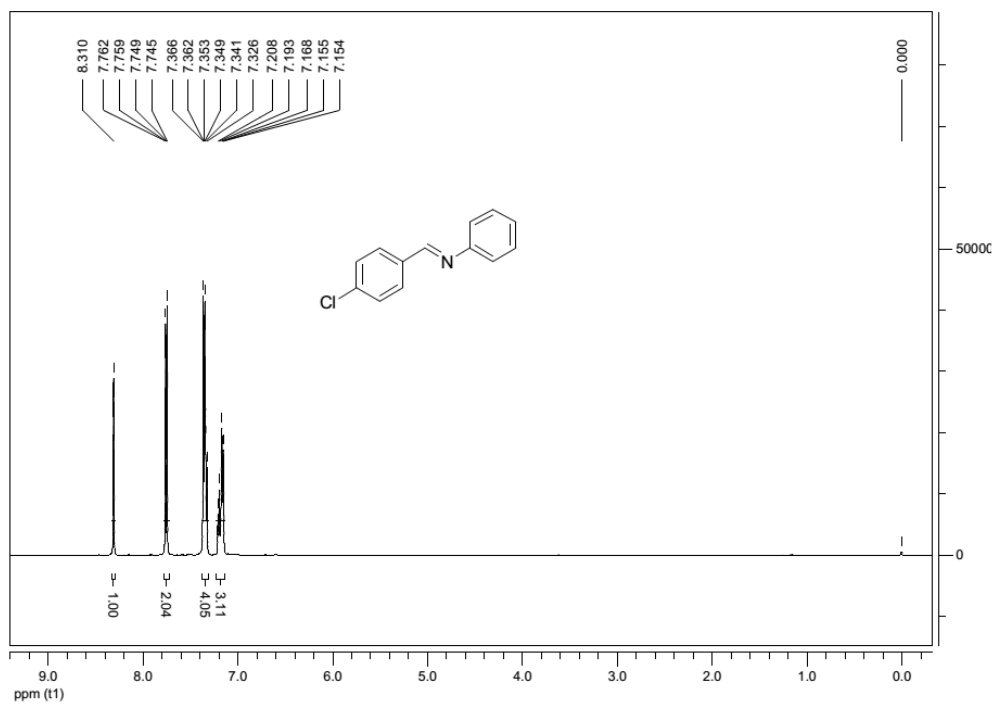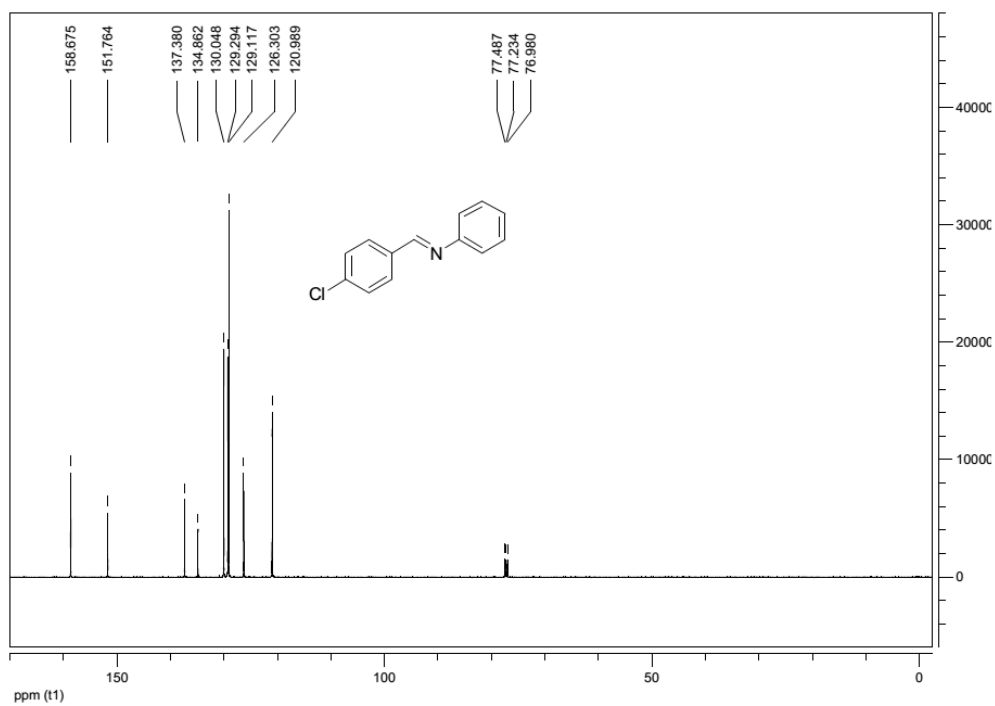

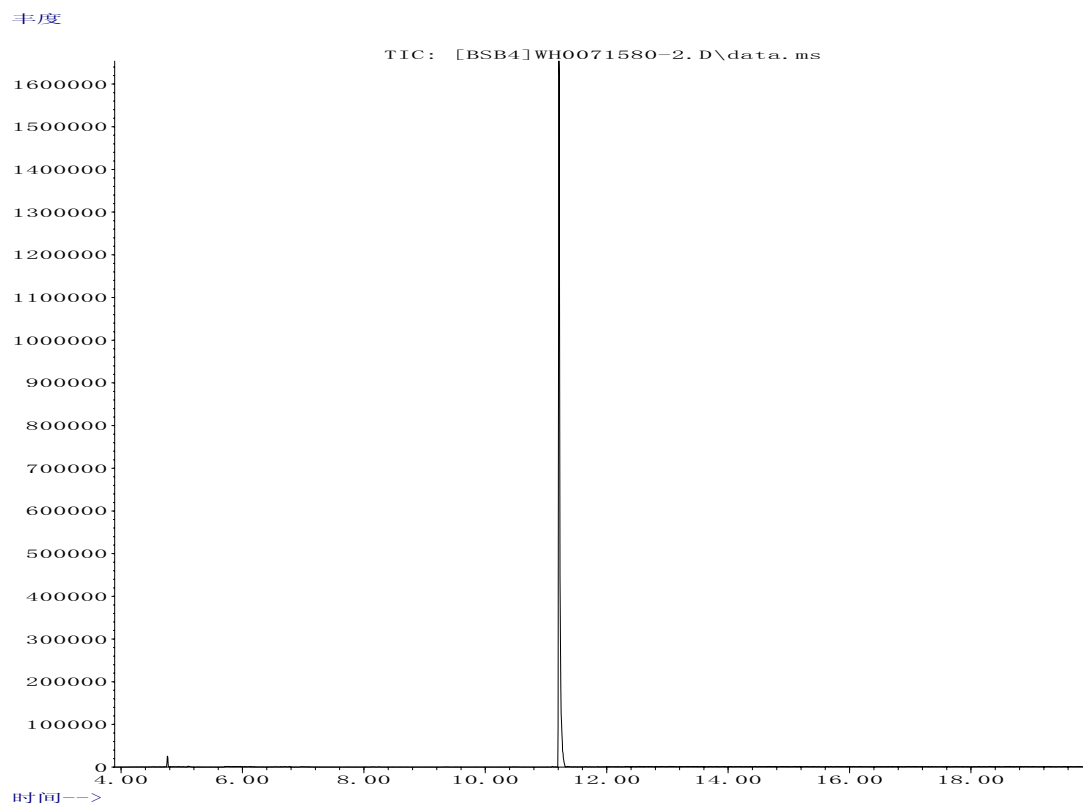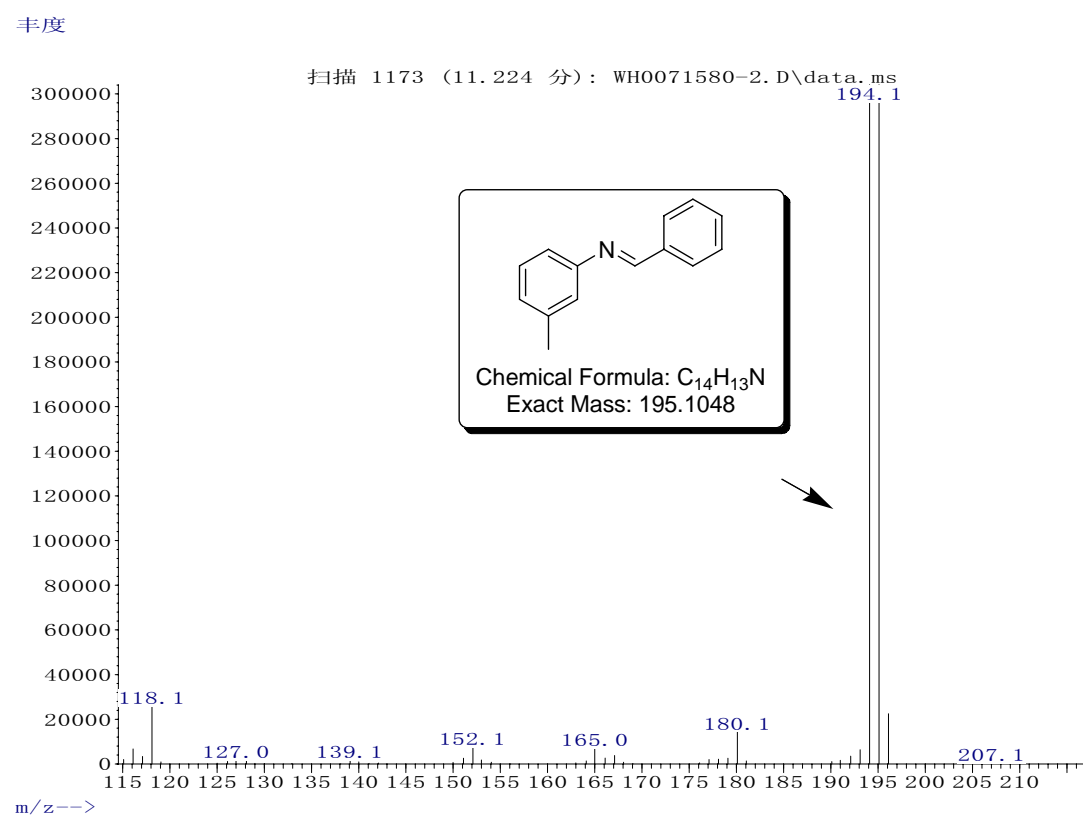

丰度

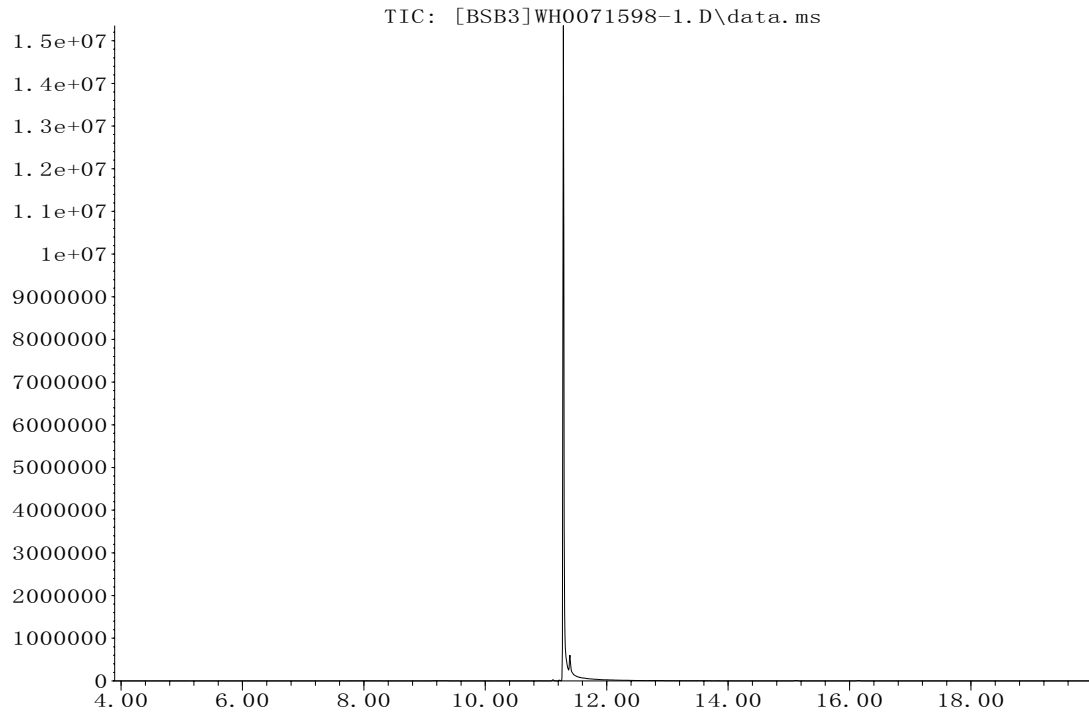

丰度

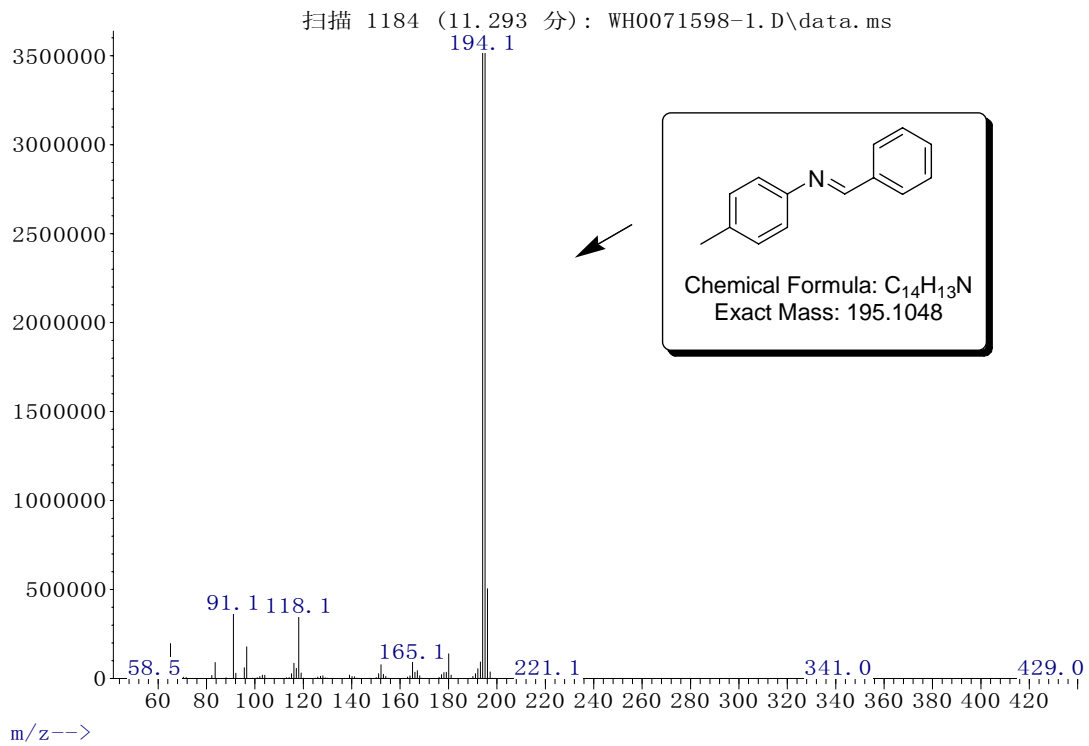

丰度

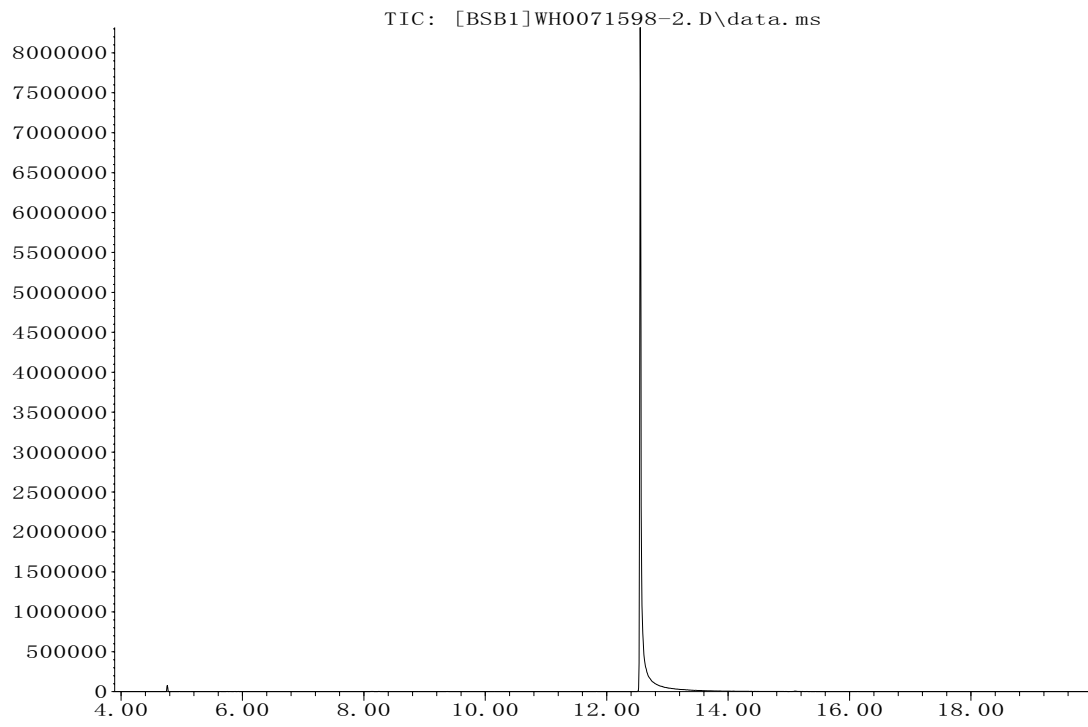

时间-->

丰度

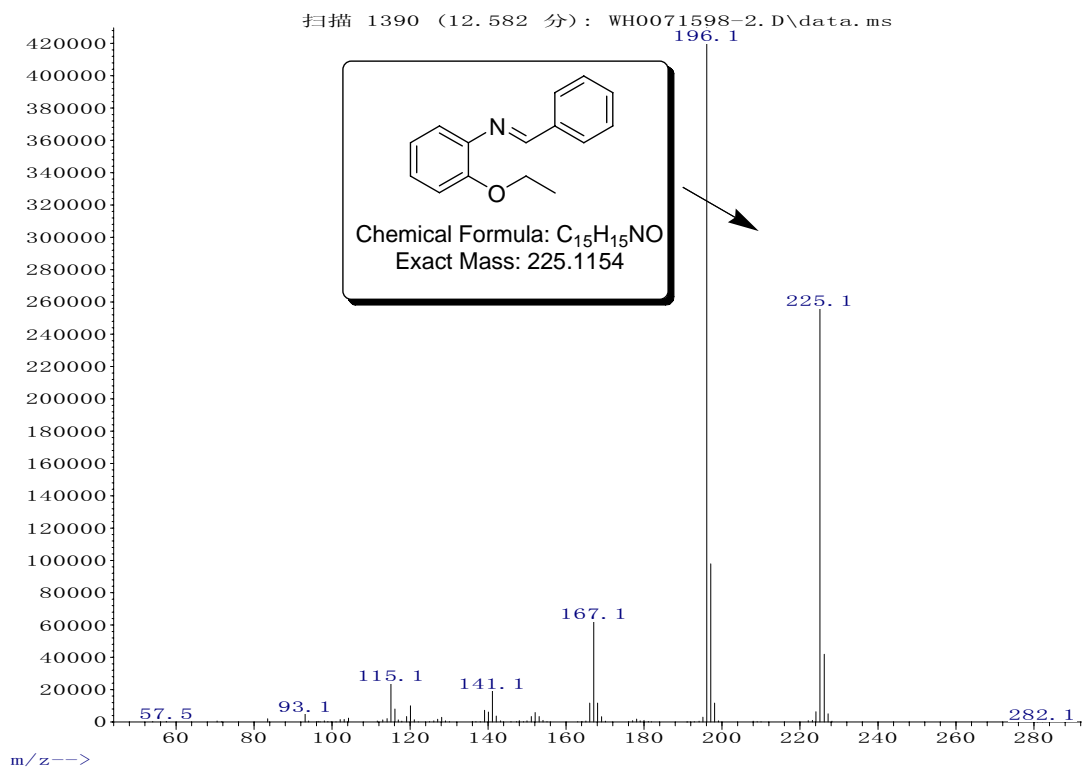

丰度

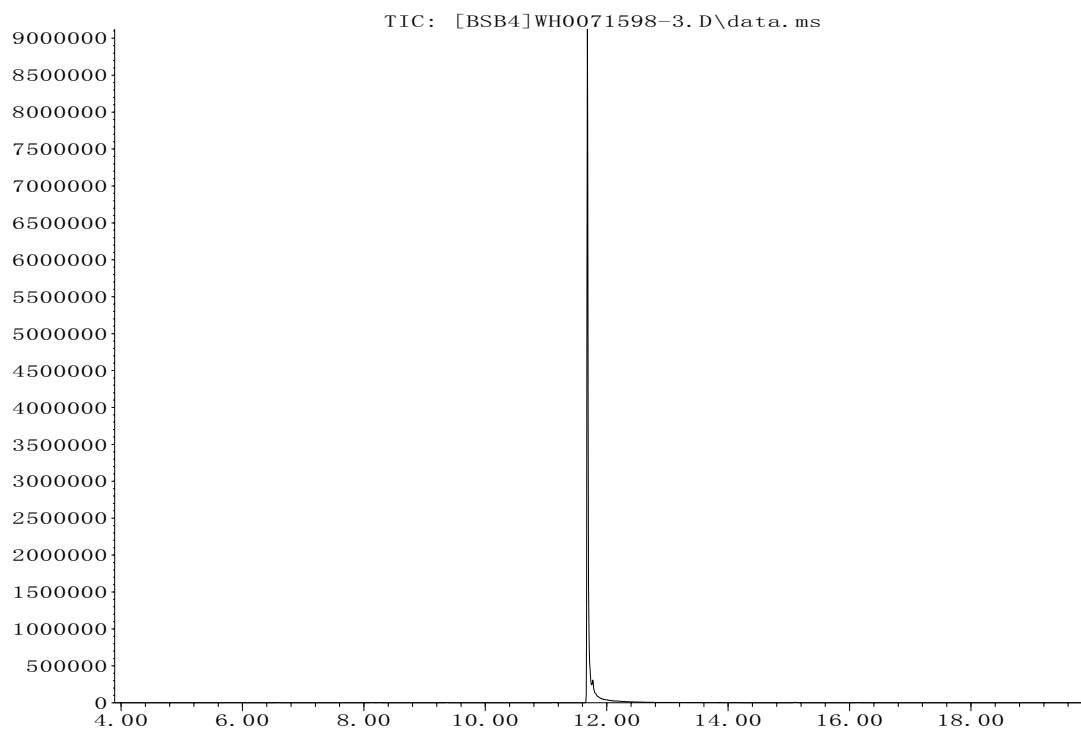

时间-->

丰度

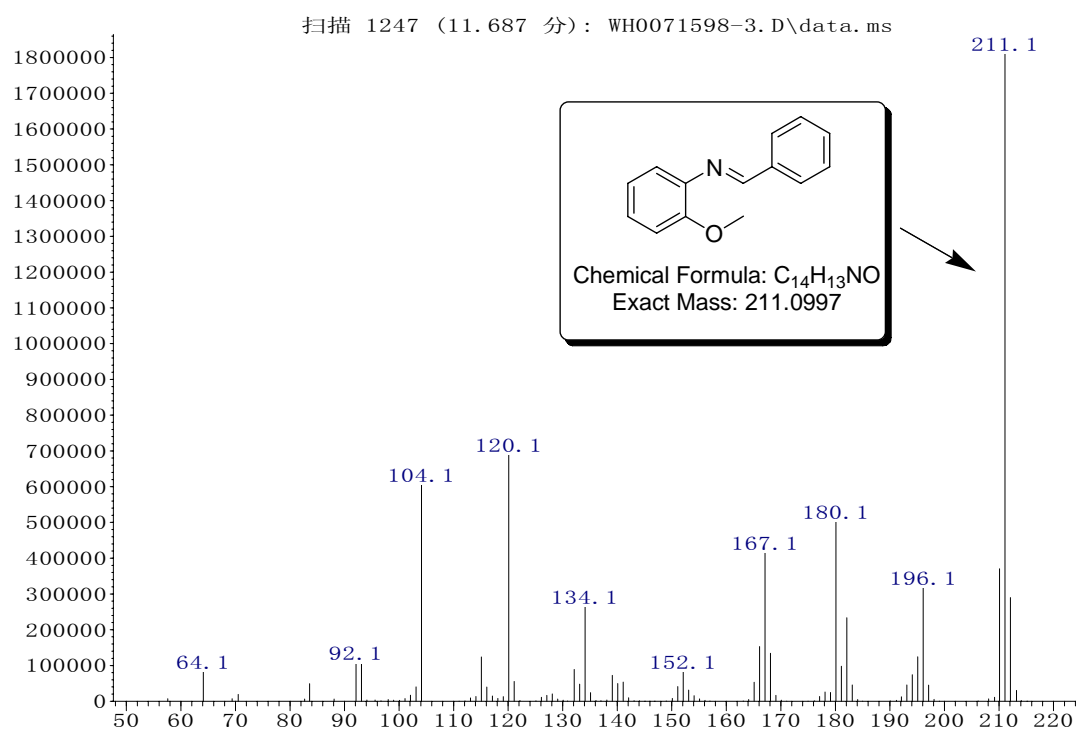

m/z-->

丰度

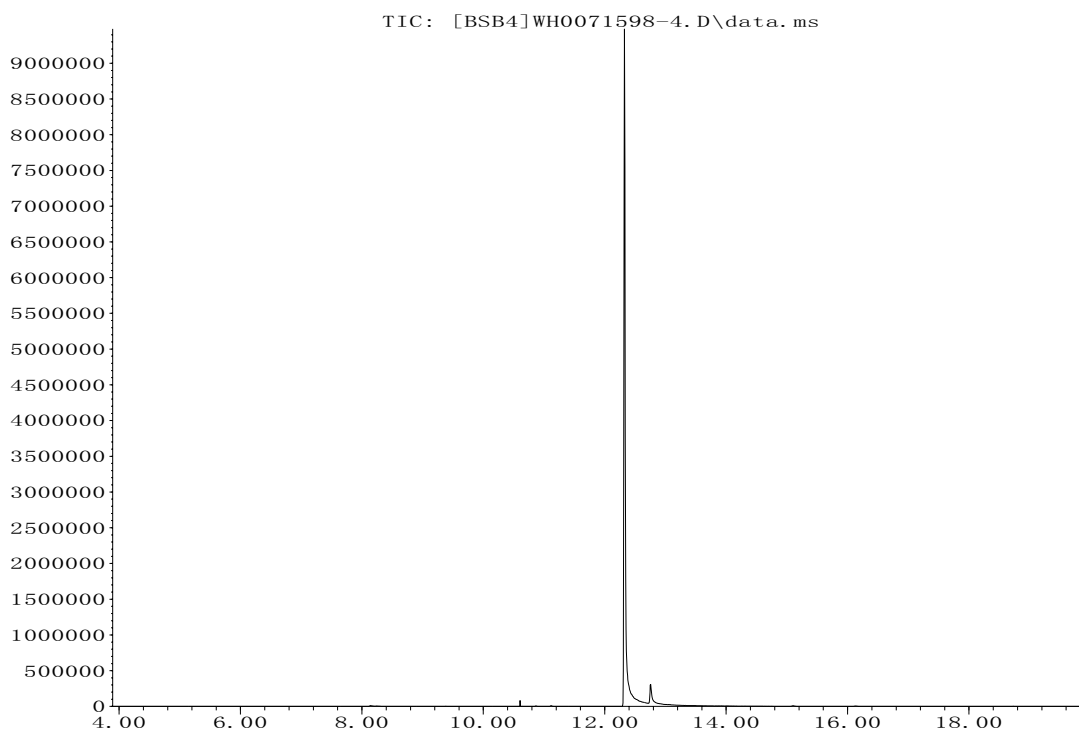

时间-->

丰度

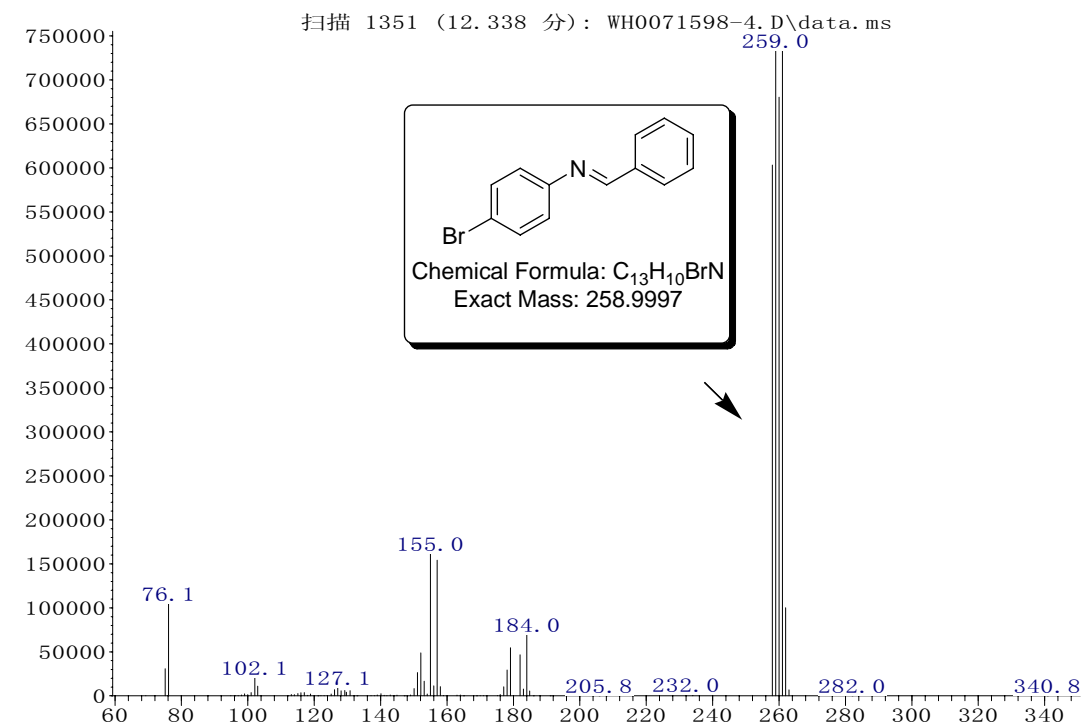

m/z-->

丰度

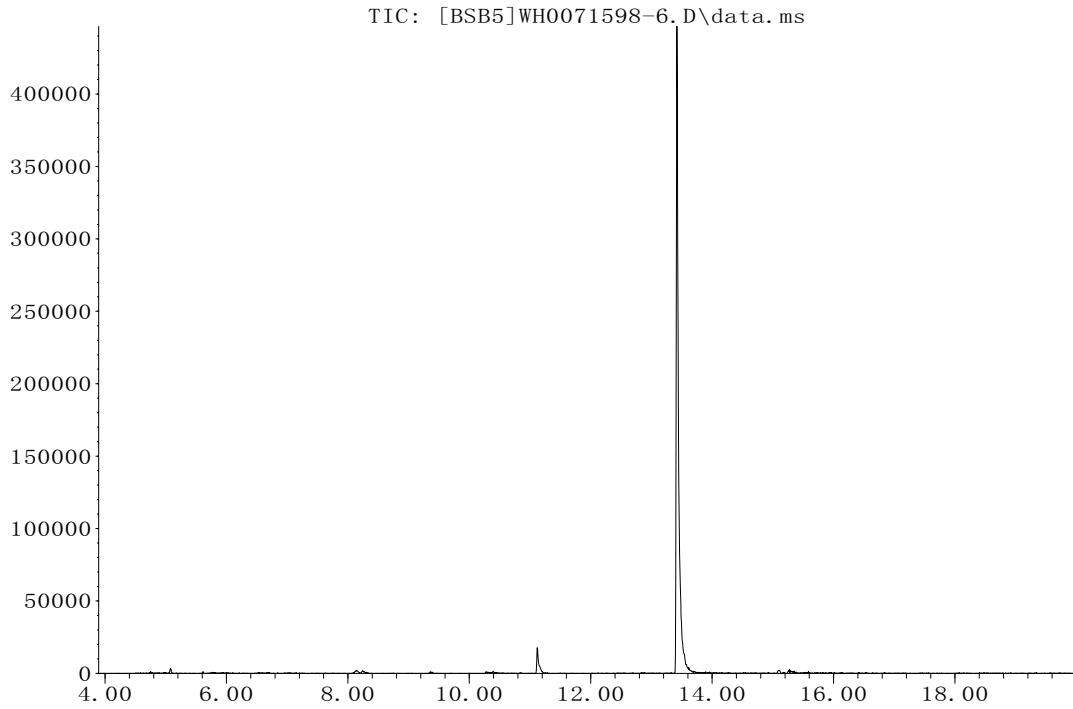

时间-->

丰度

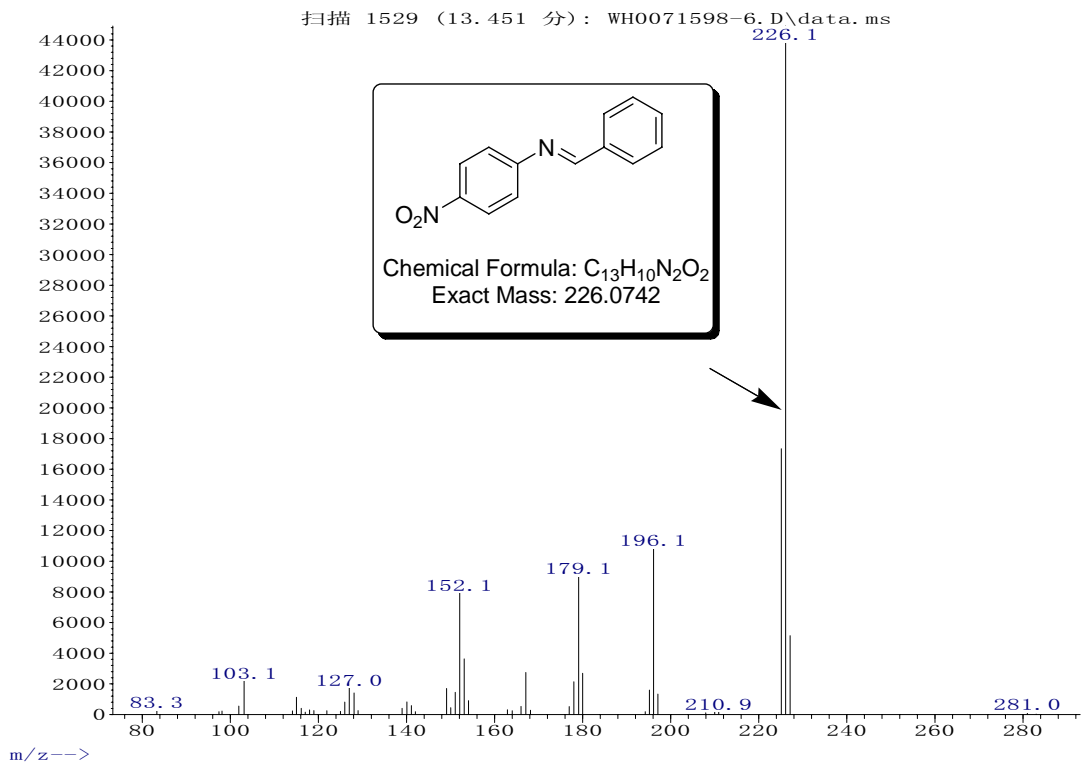

丰度

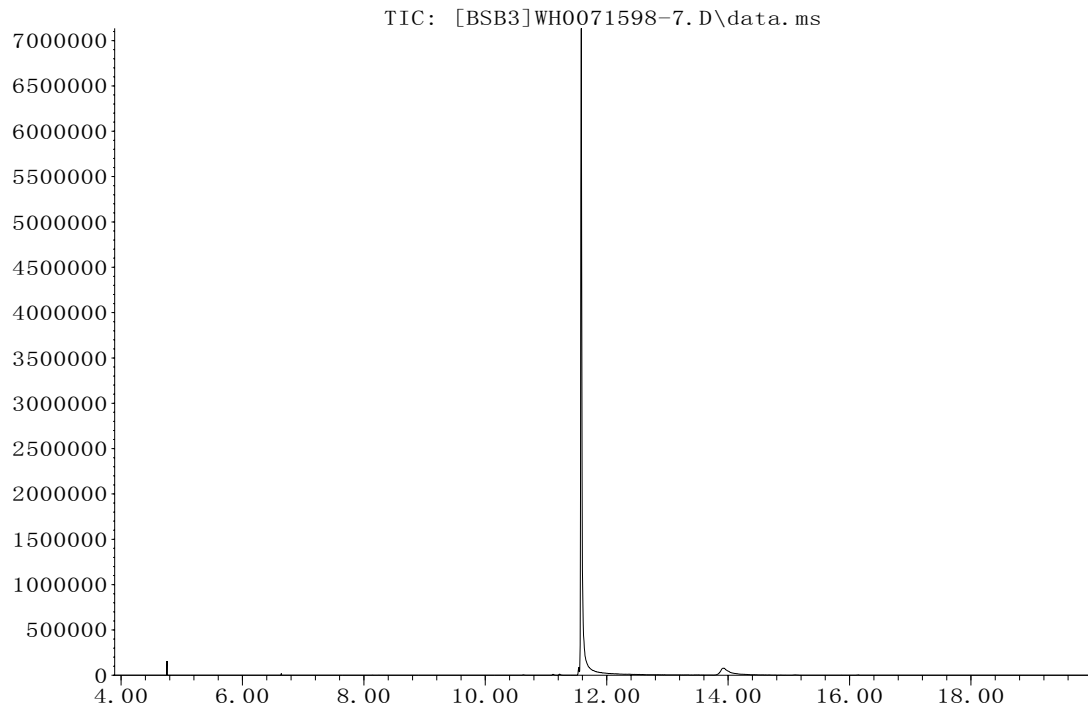

丰度

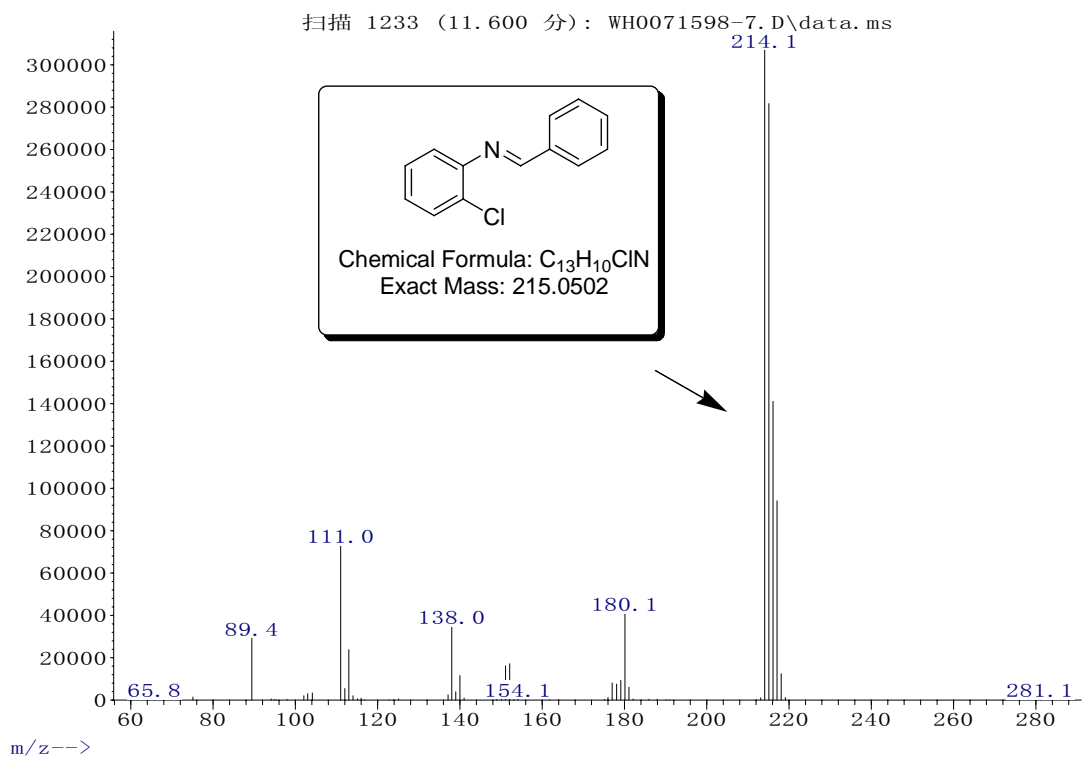



丰度

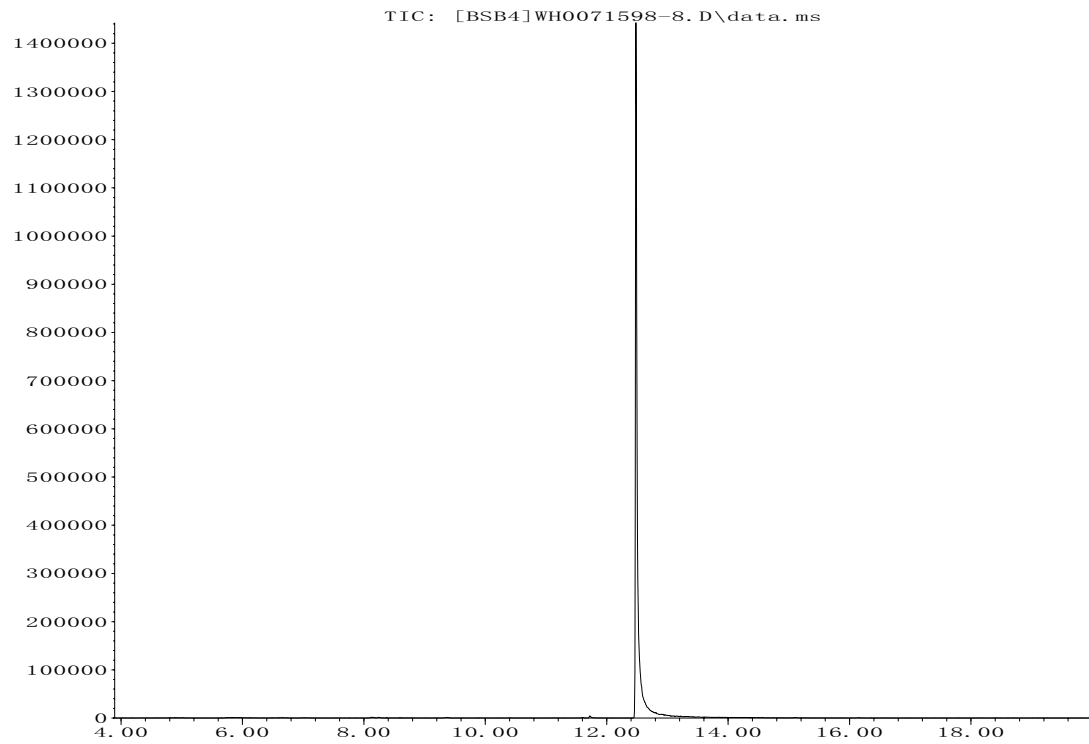

丰度

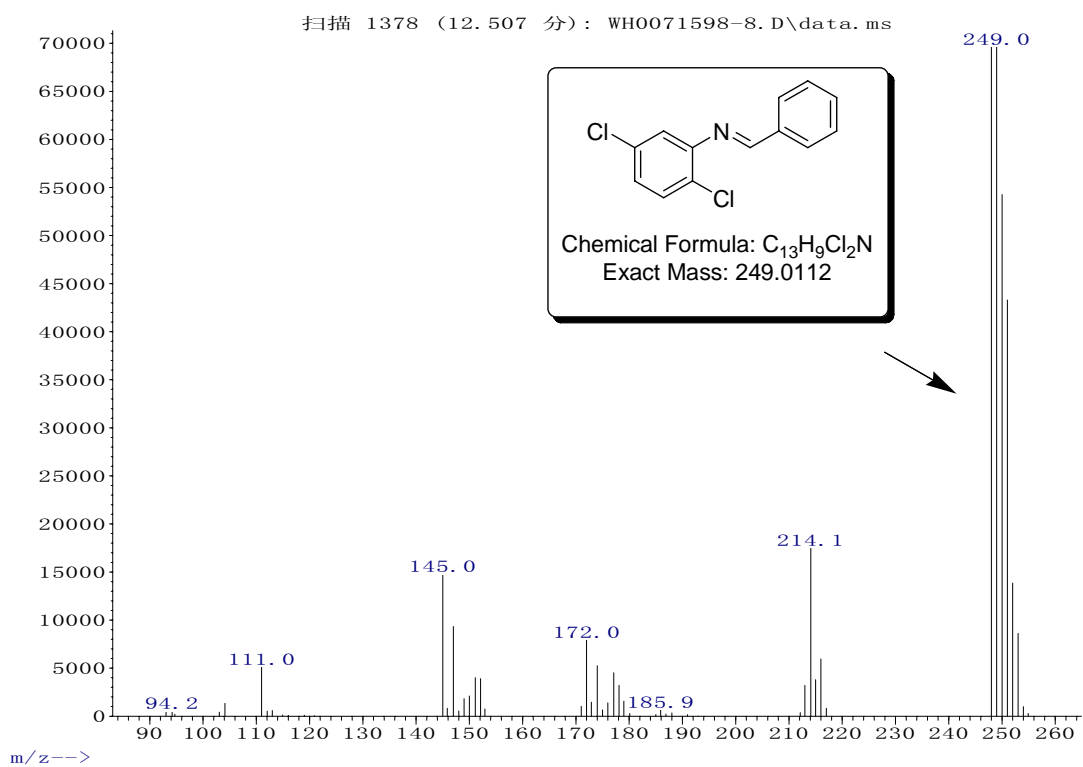

丰度

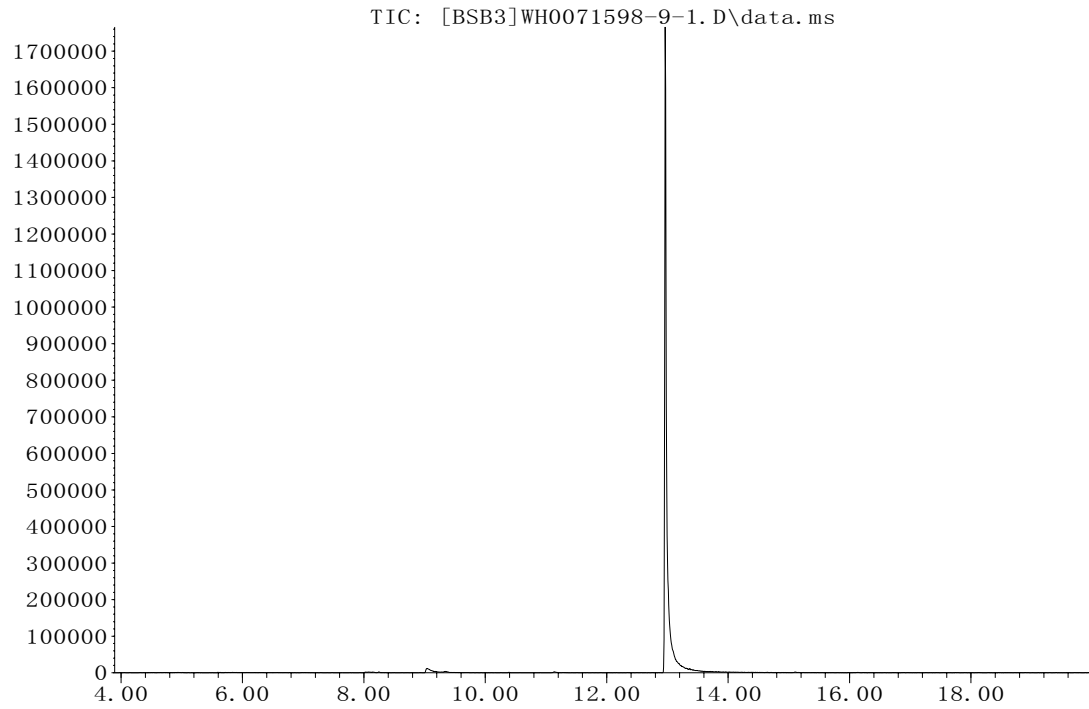

时间-->

丰度

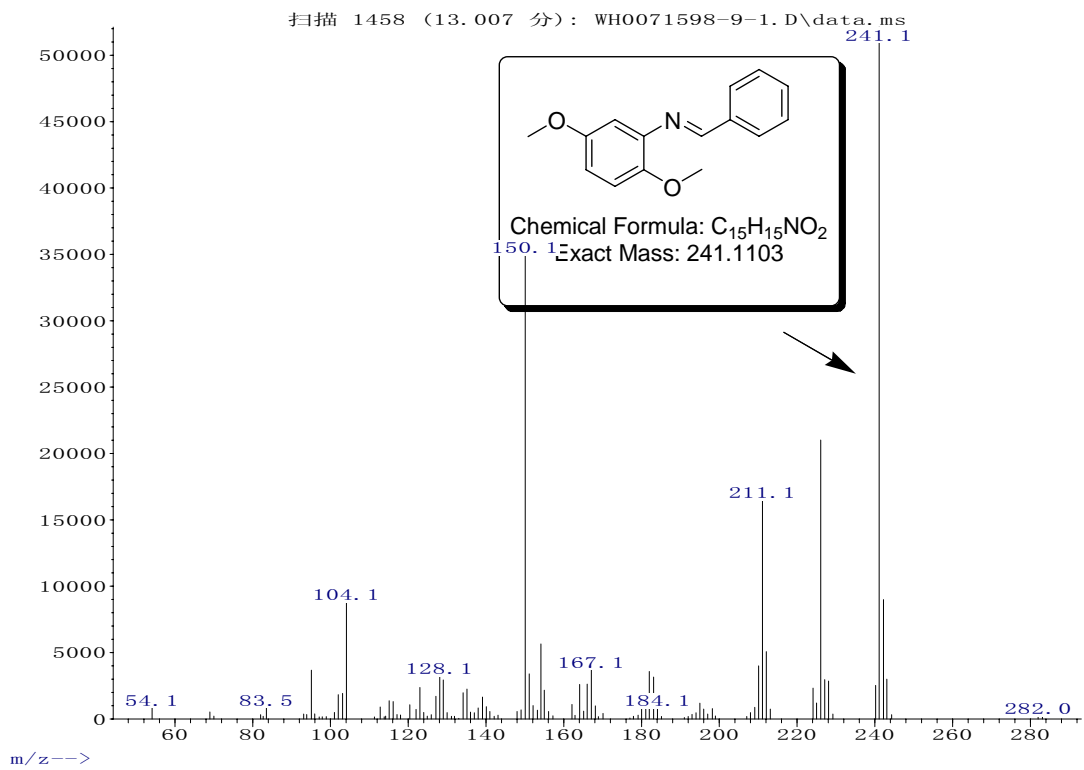

丰度

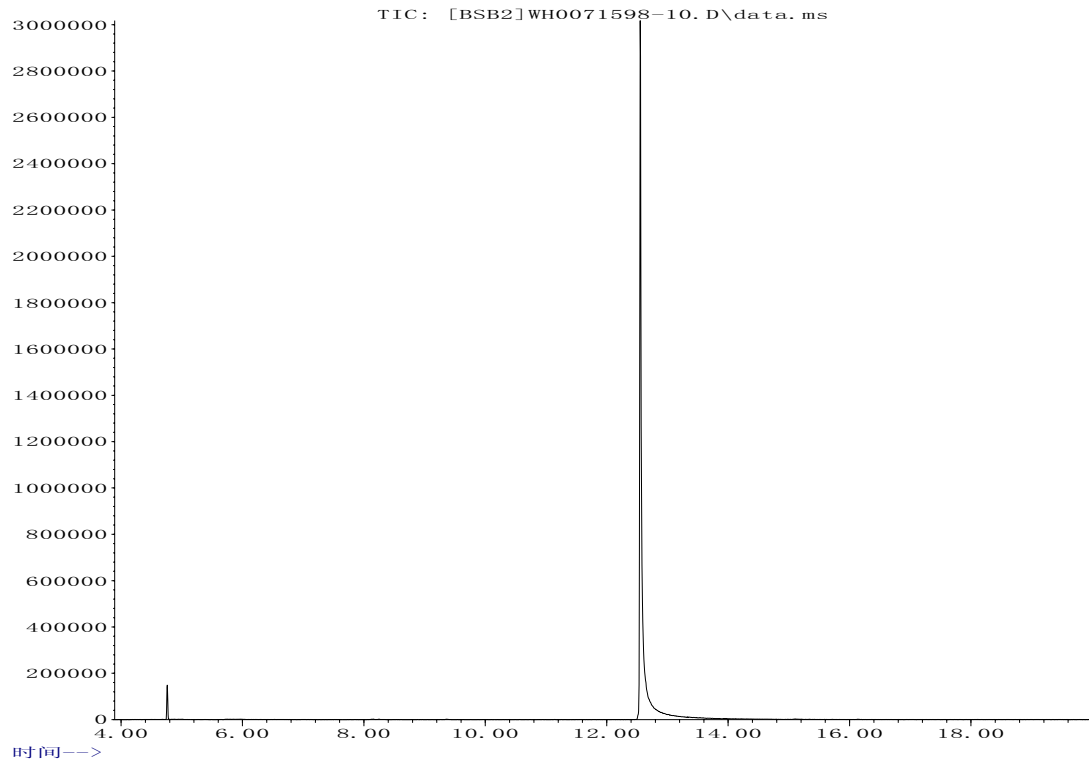

丰度

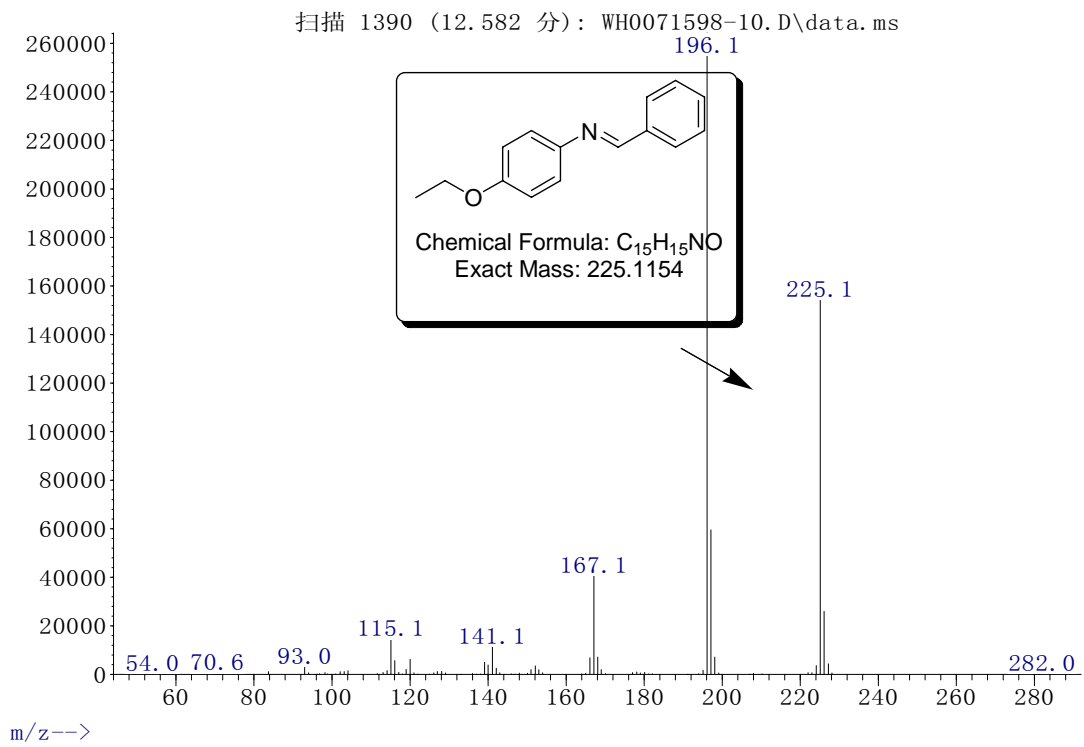

丰度

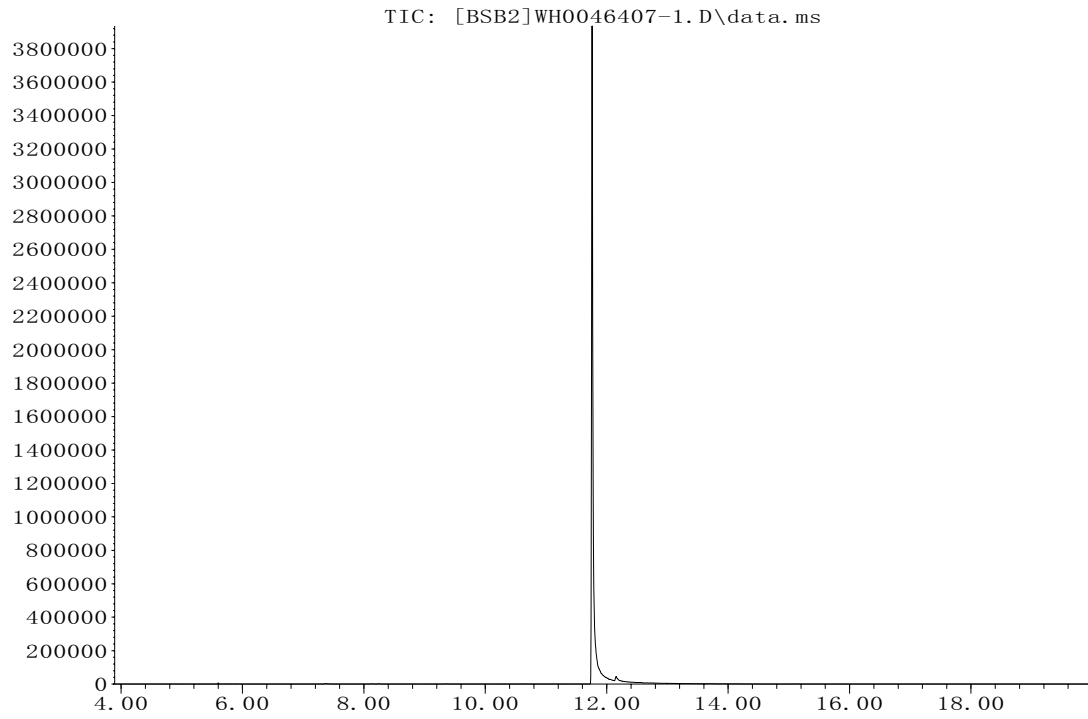

丰度

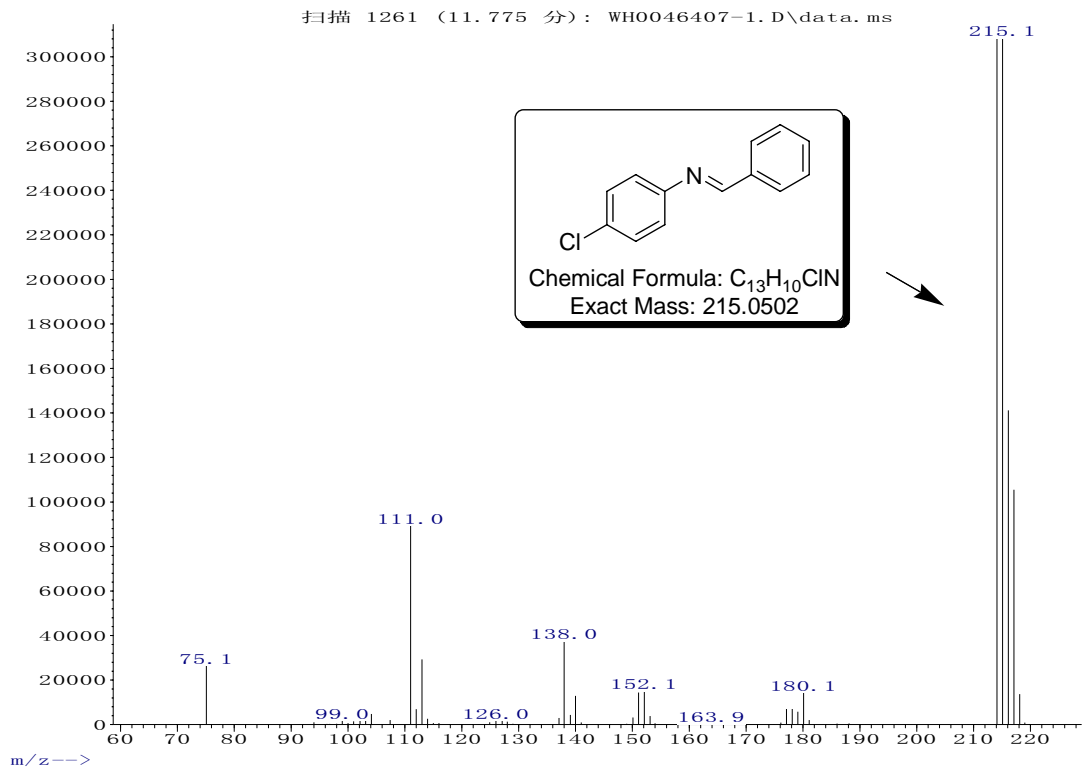

丰度

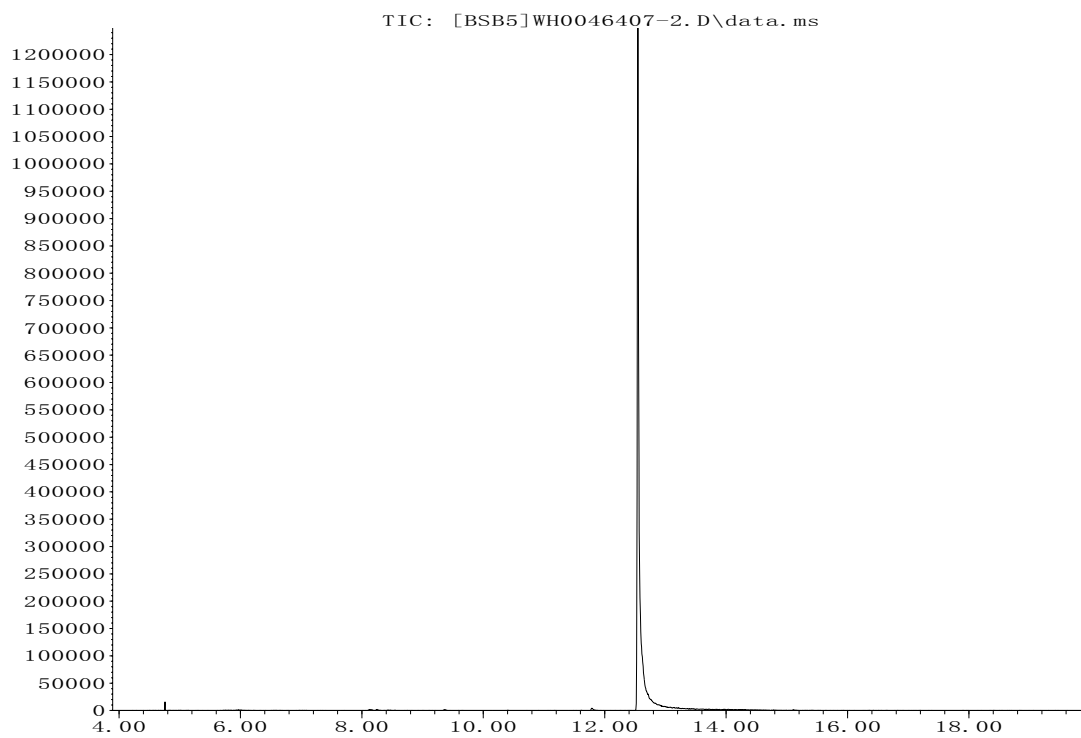

时间-->

丰度

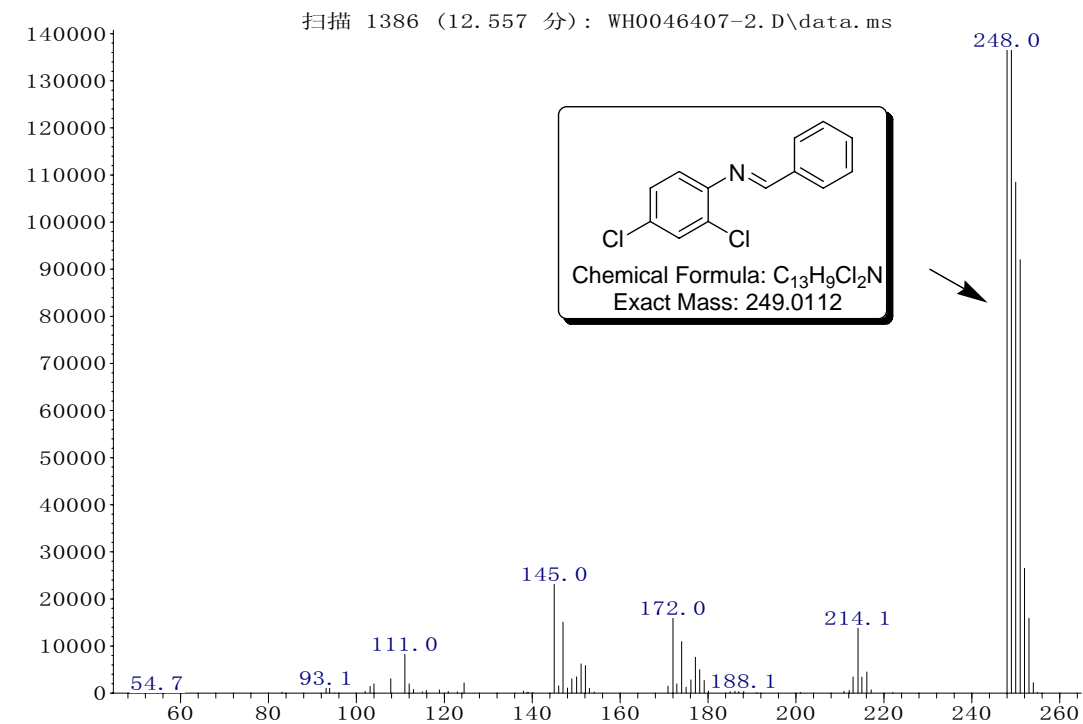

m/z-->

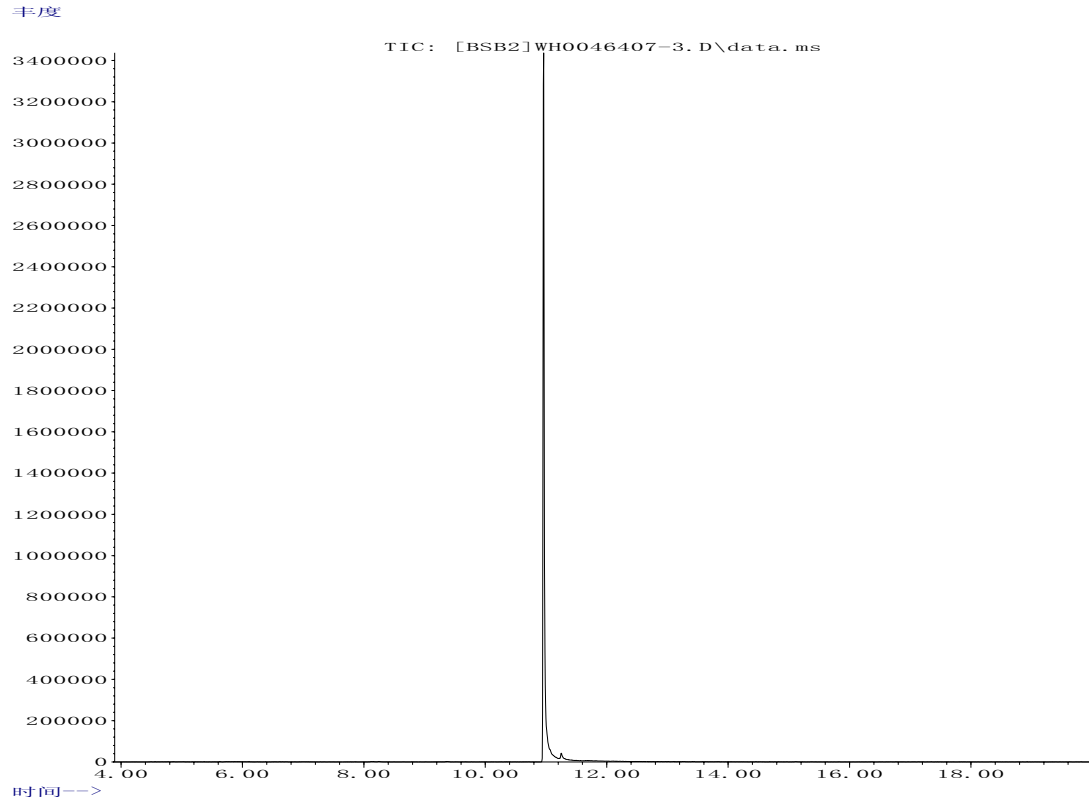

丰度

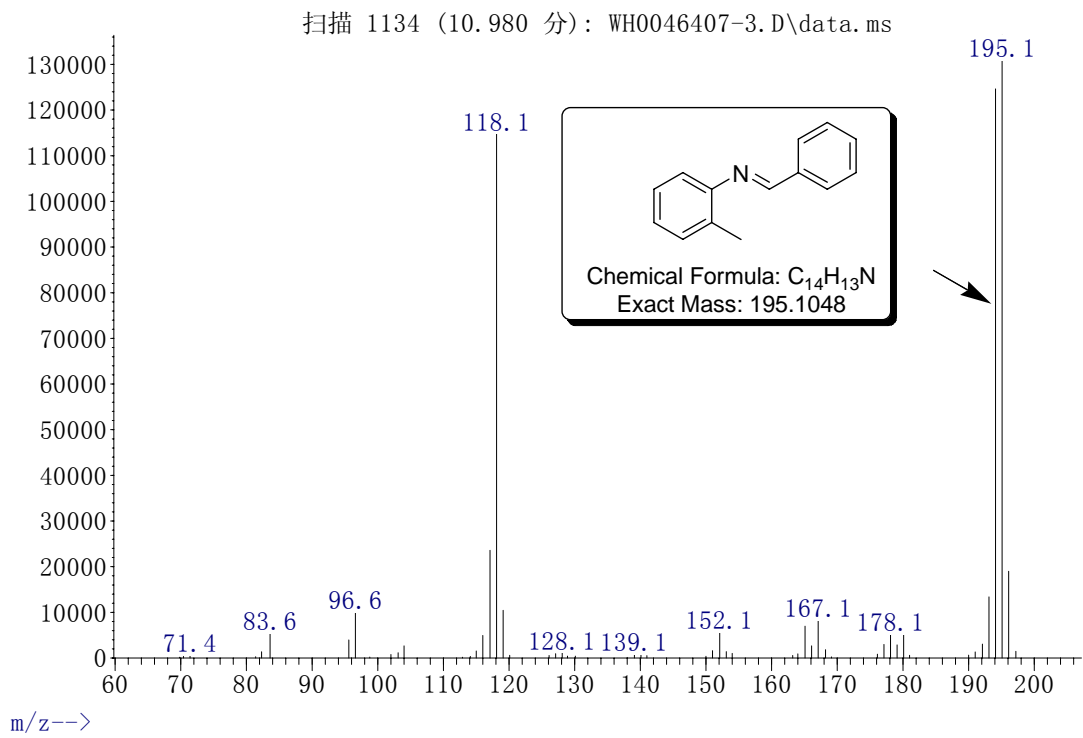

丰度

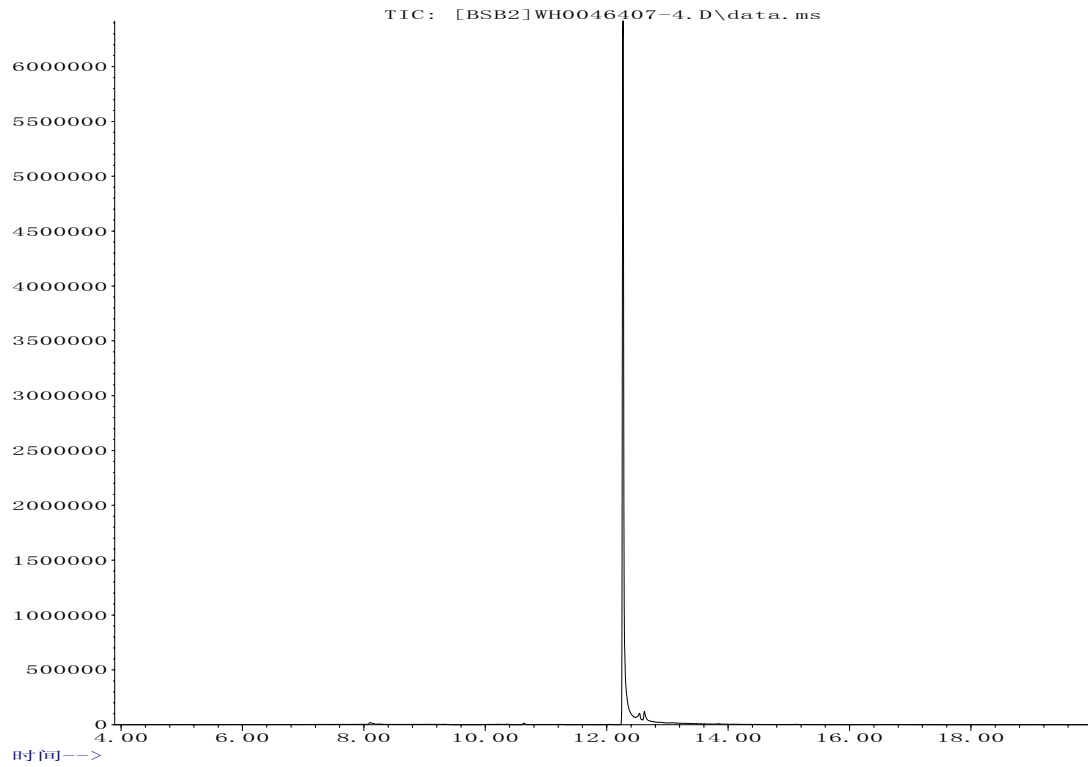

丰度

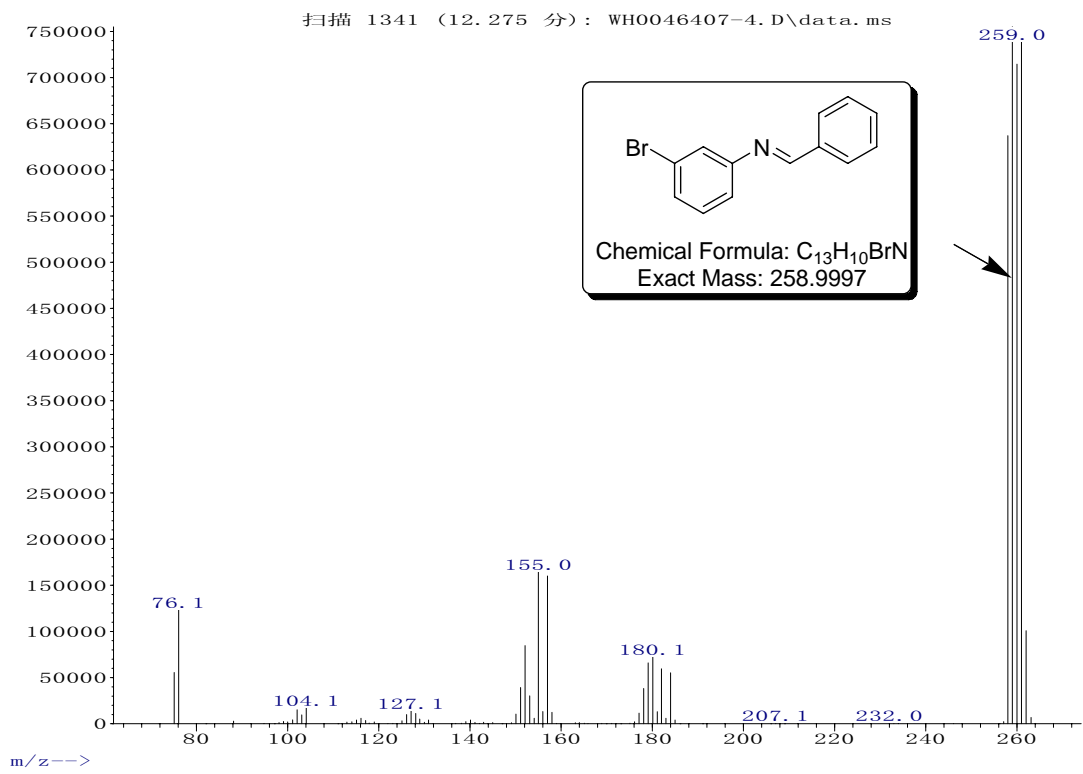

丰度

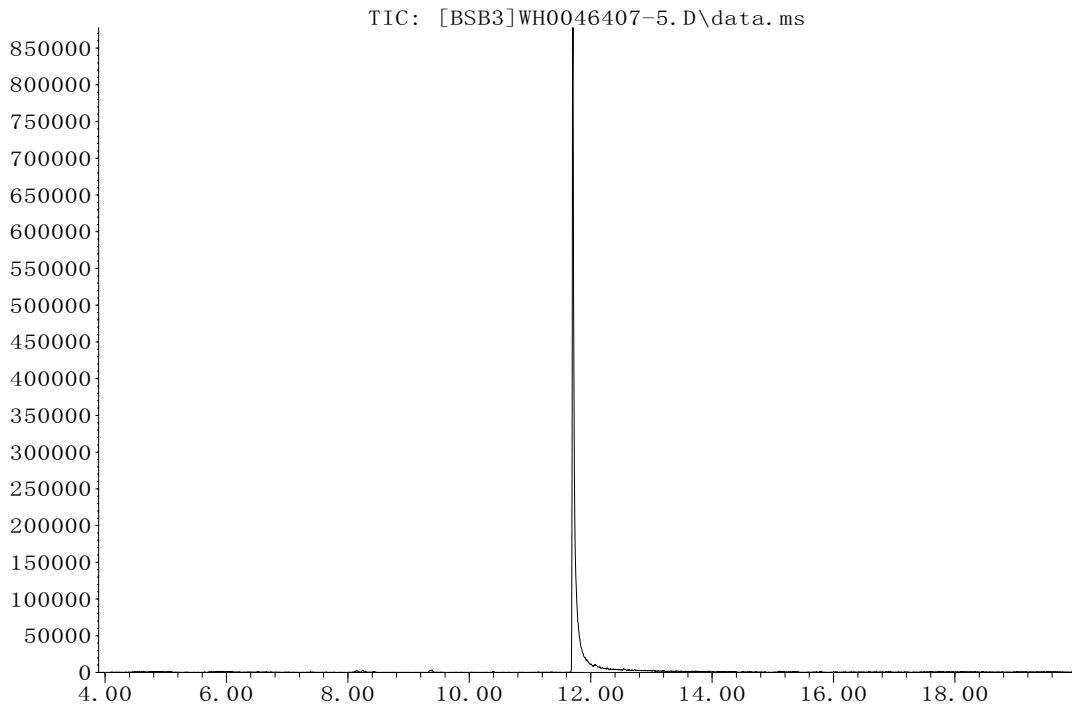

丰度

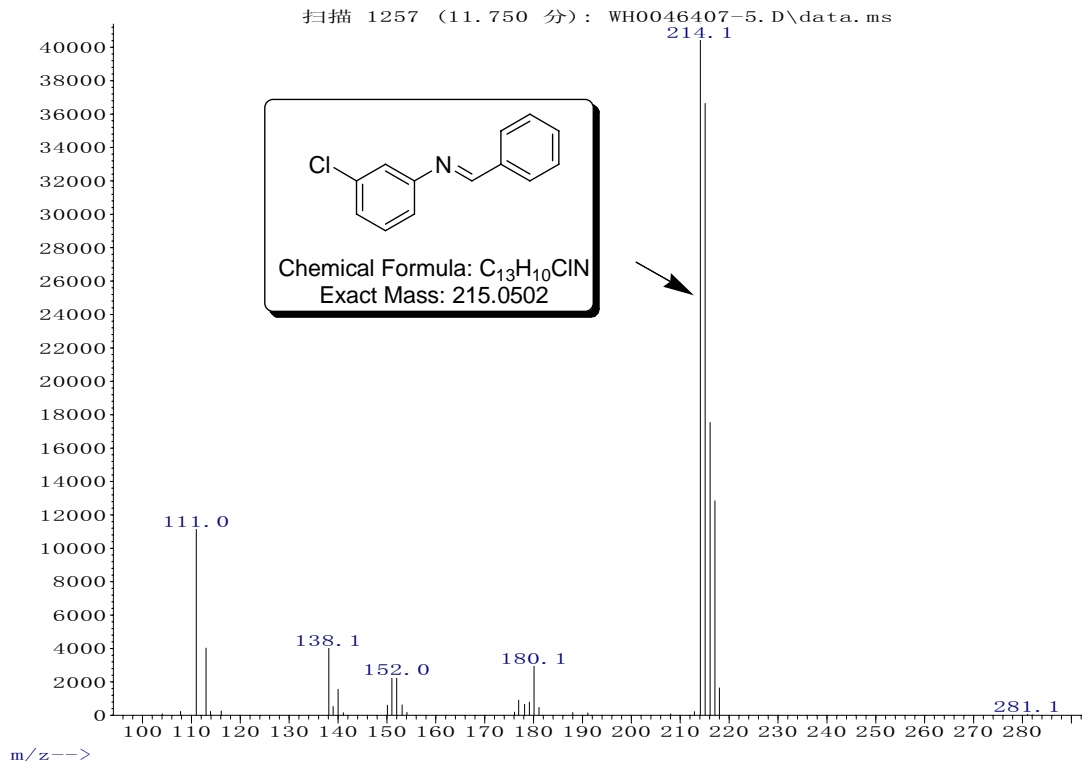



丰度

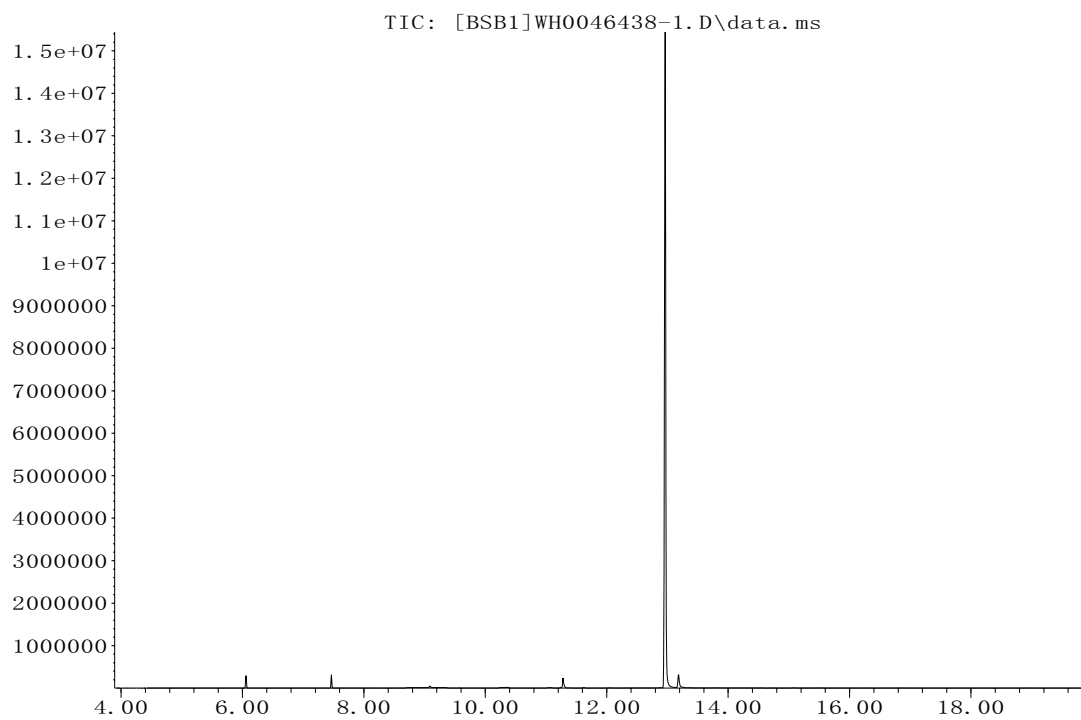

时间-->

丰度

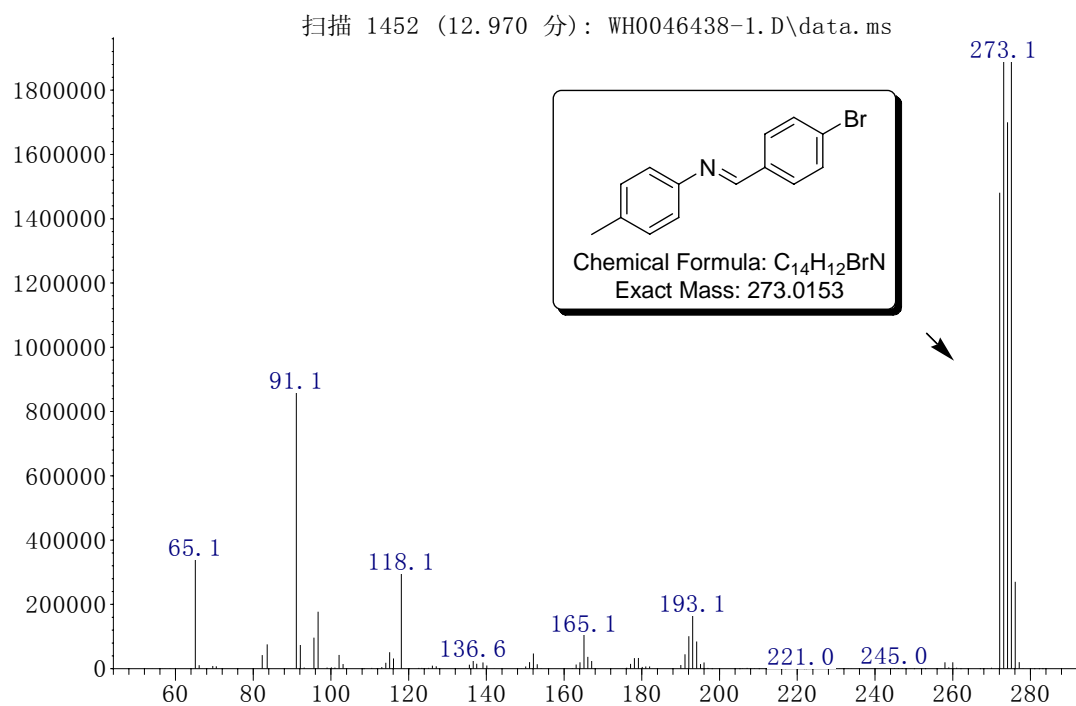

m/z-->

丰度

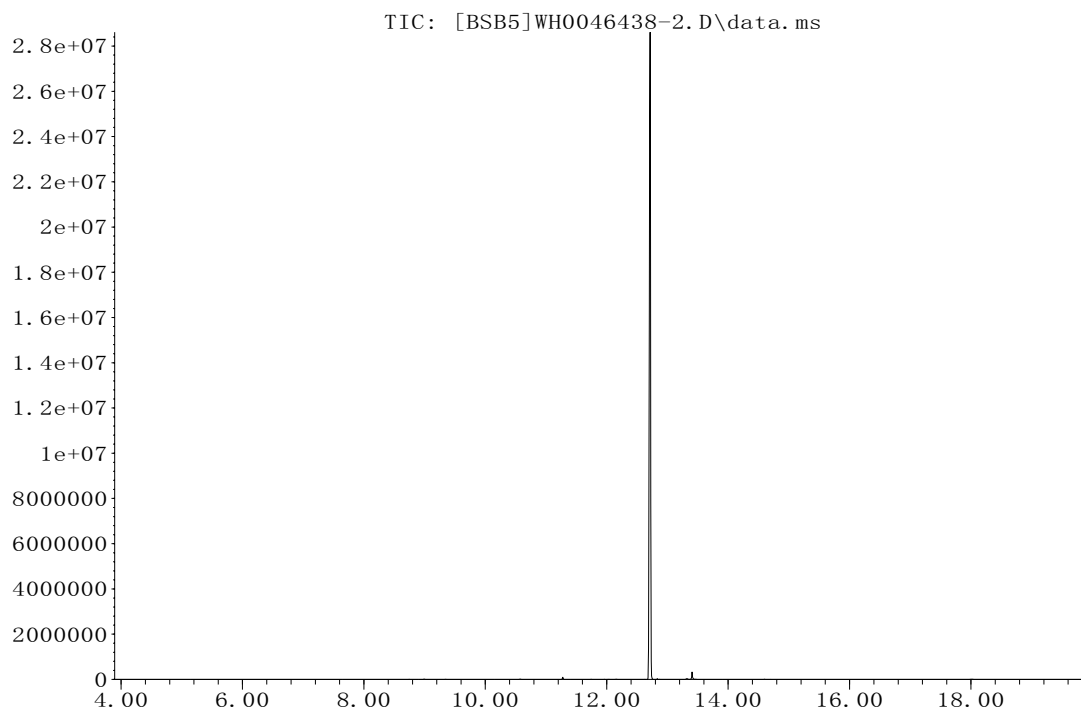

丰度

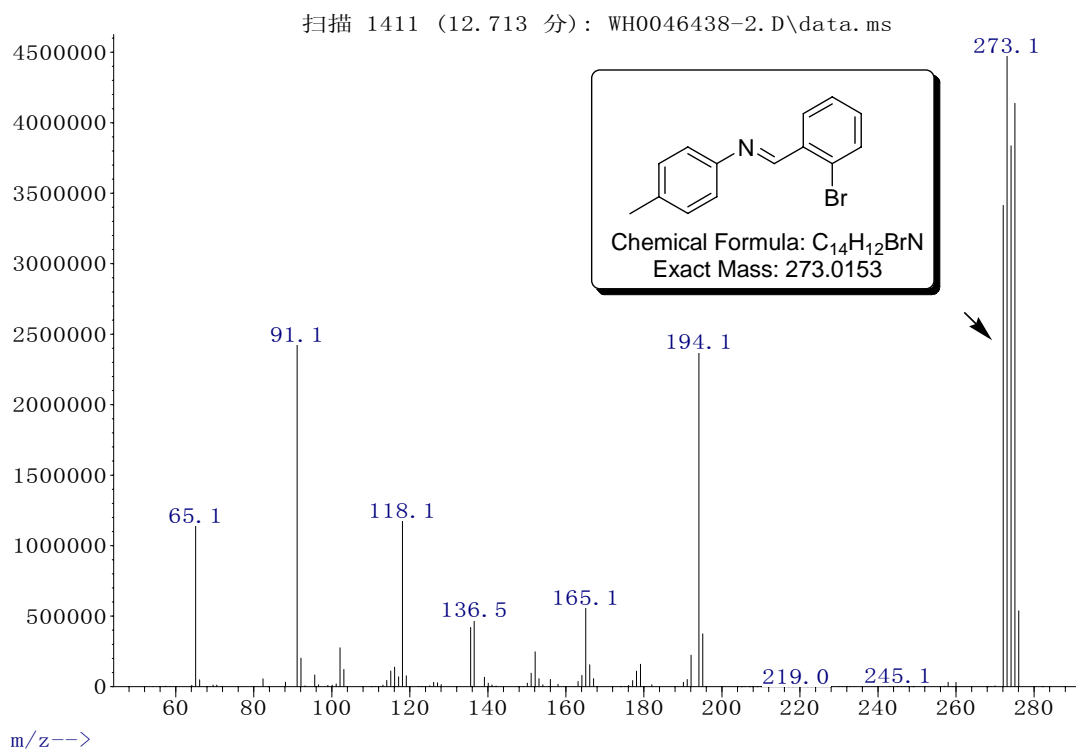

丰度

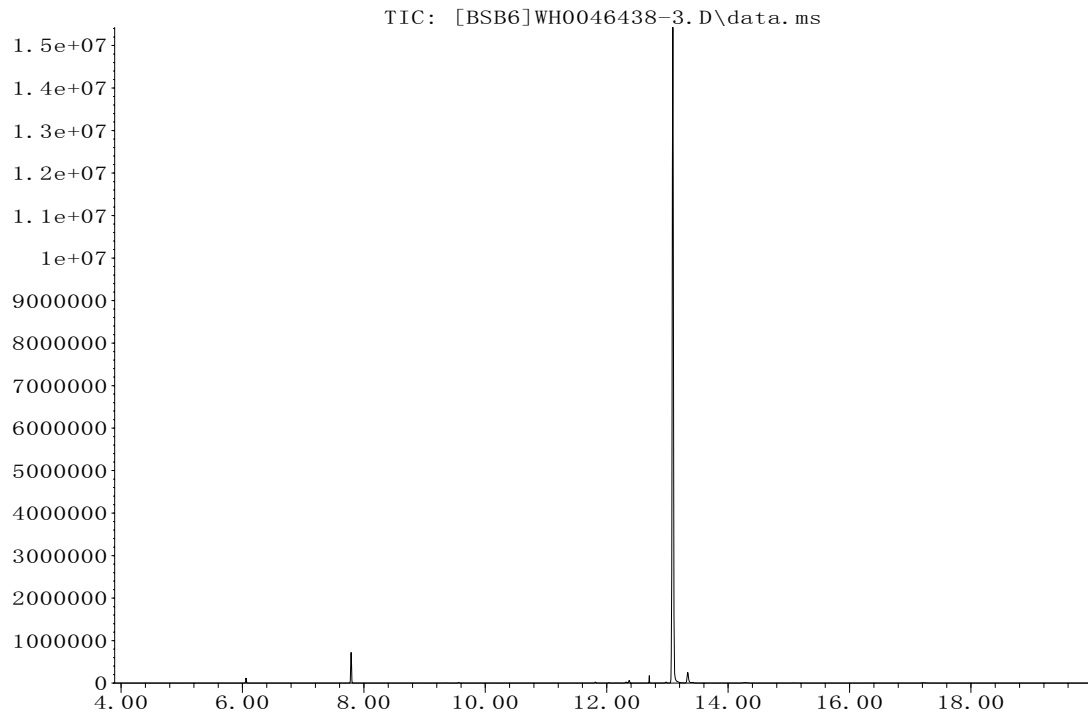

丰度

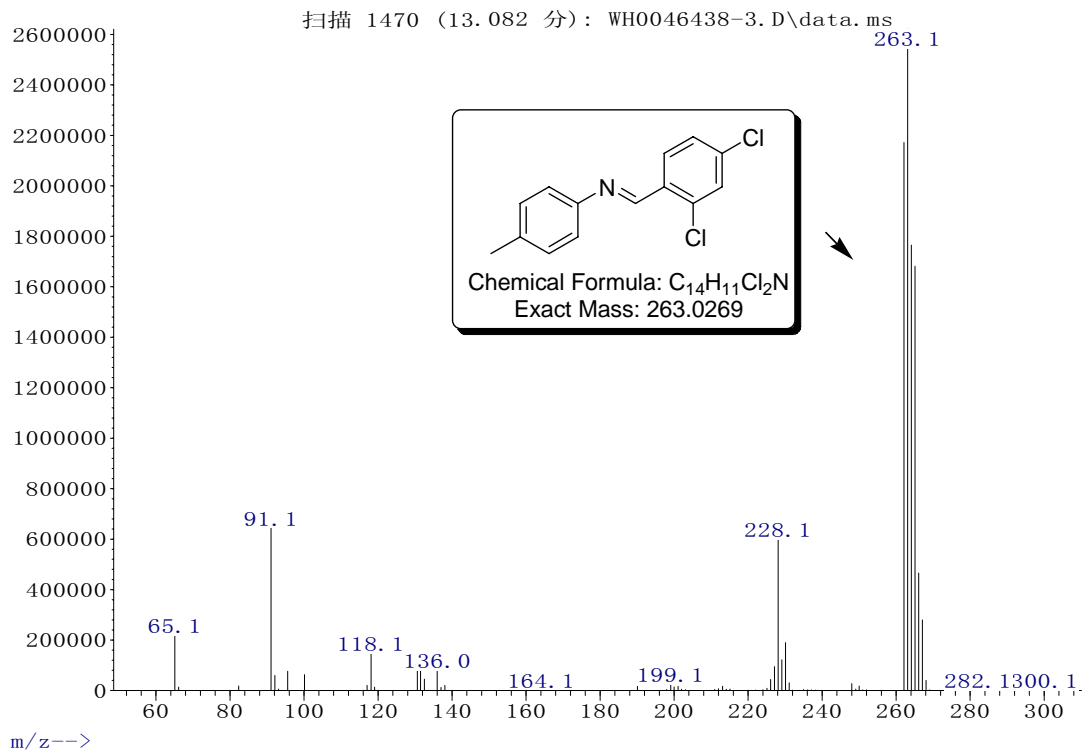

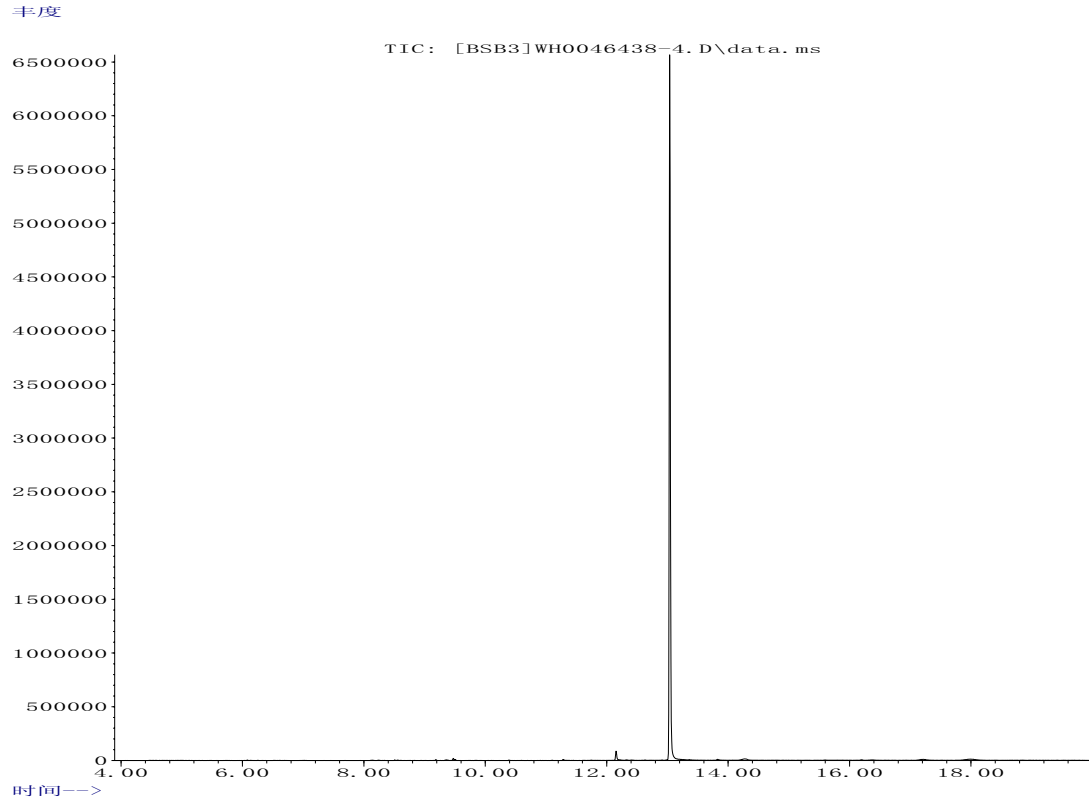

丰度

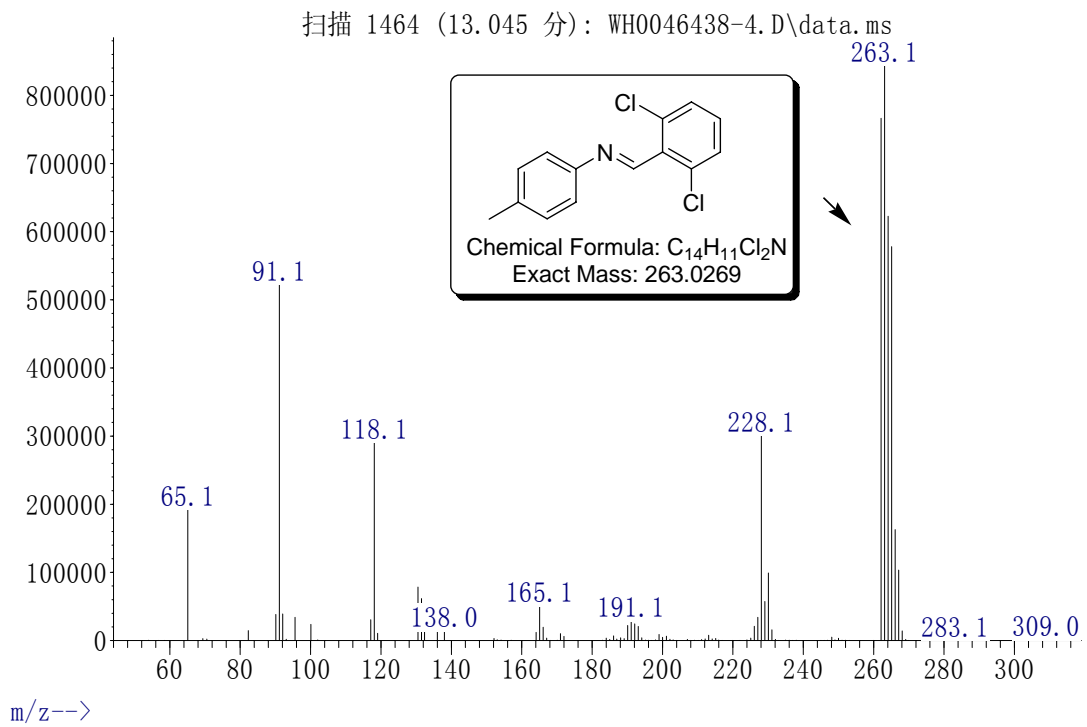

丰度

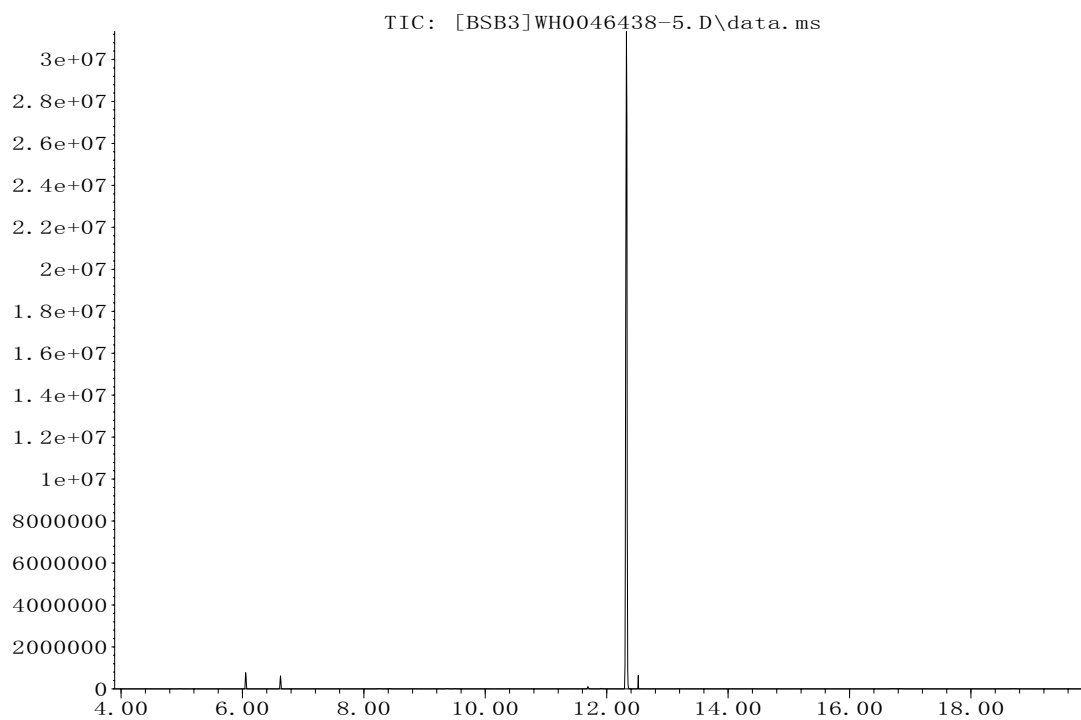

丰度

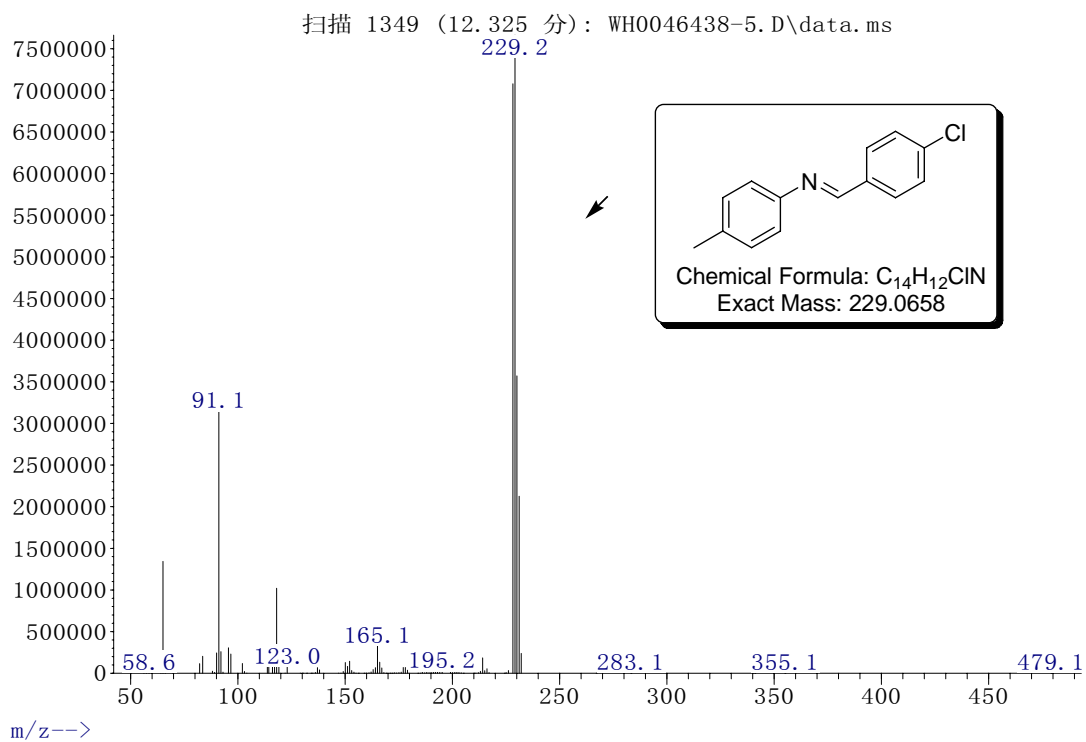

丰度

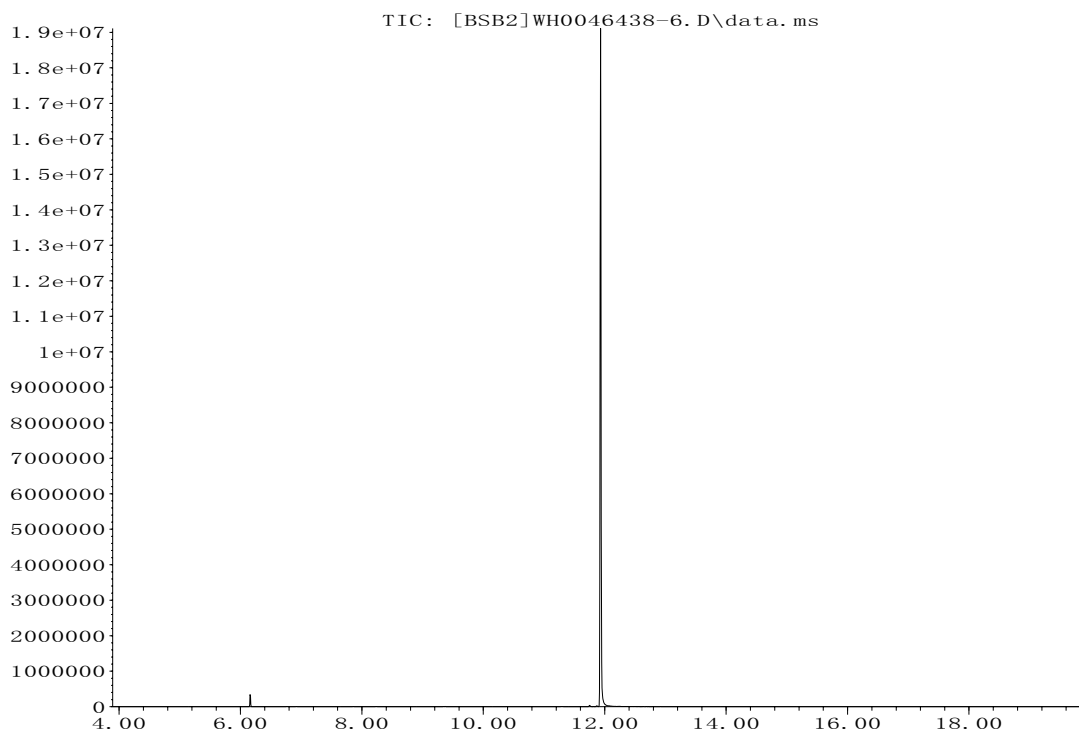

时间-->

丰度

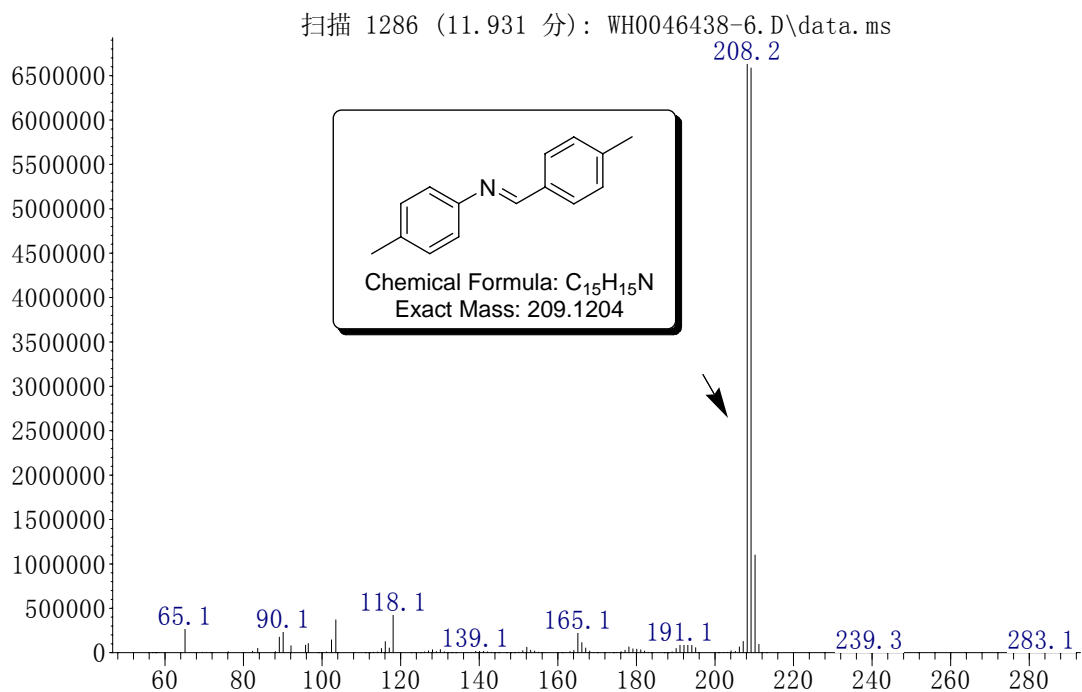

m/z-->

丰度

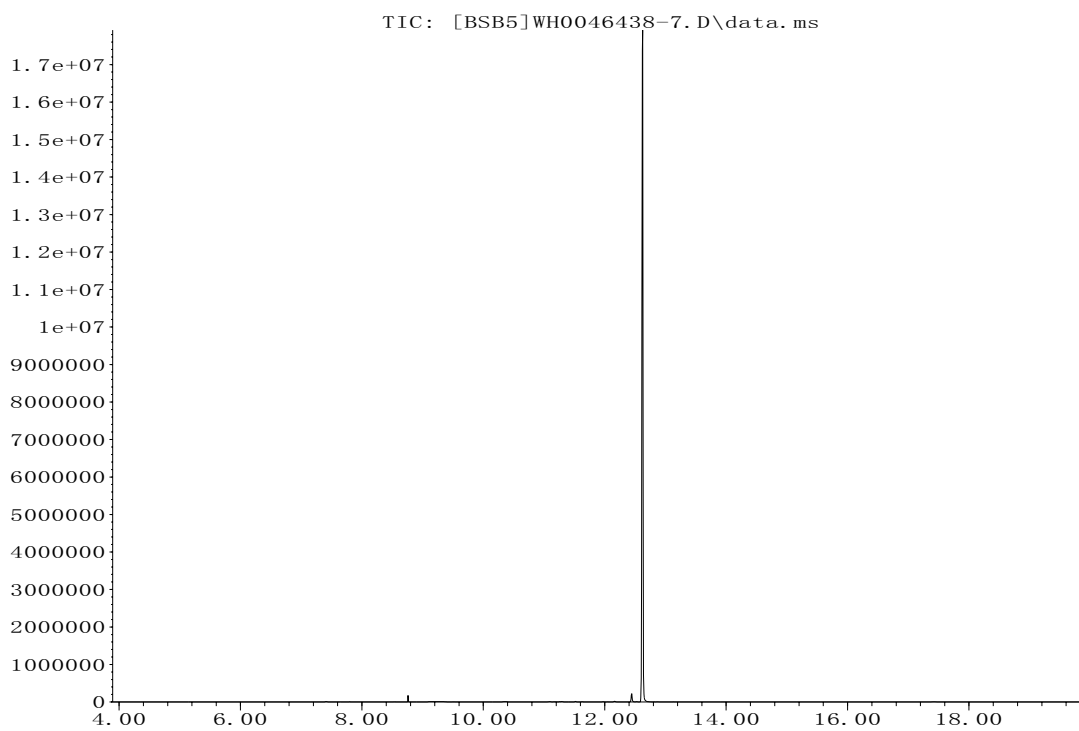

丰度

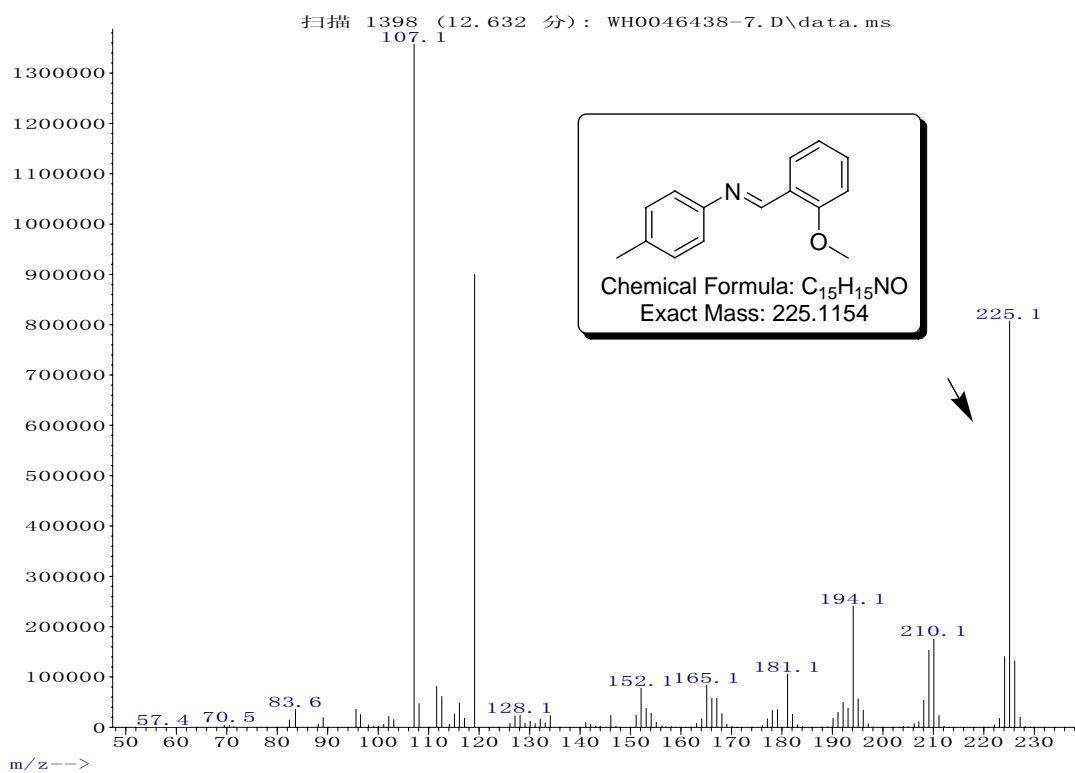

丰度

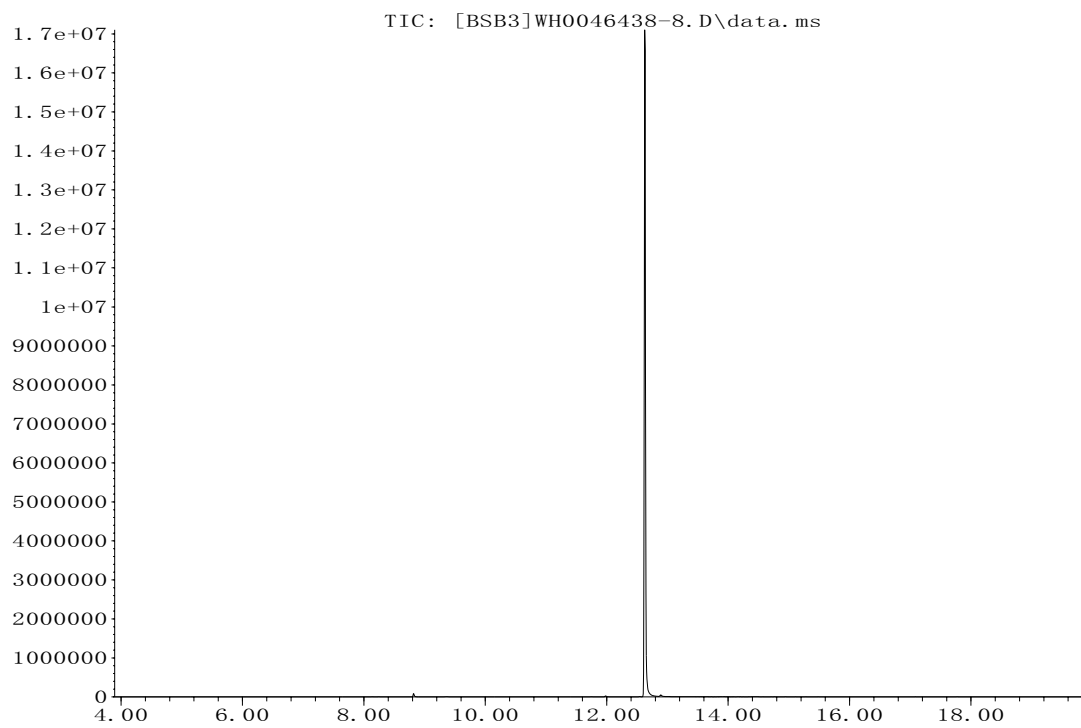

丰度

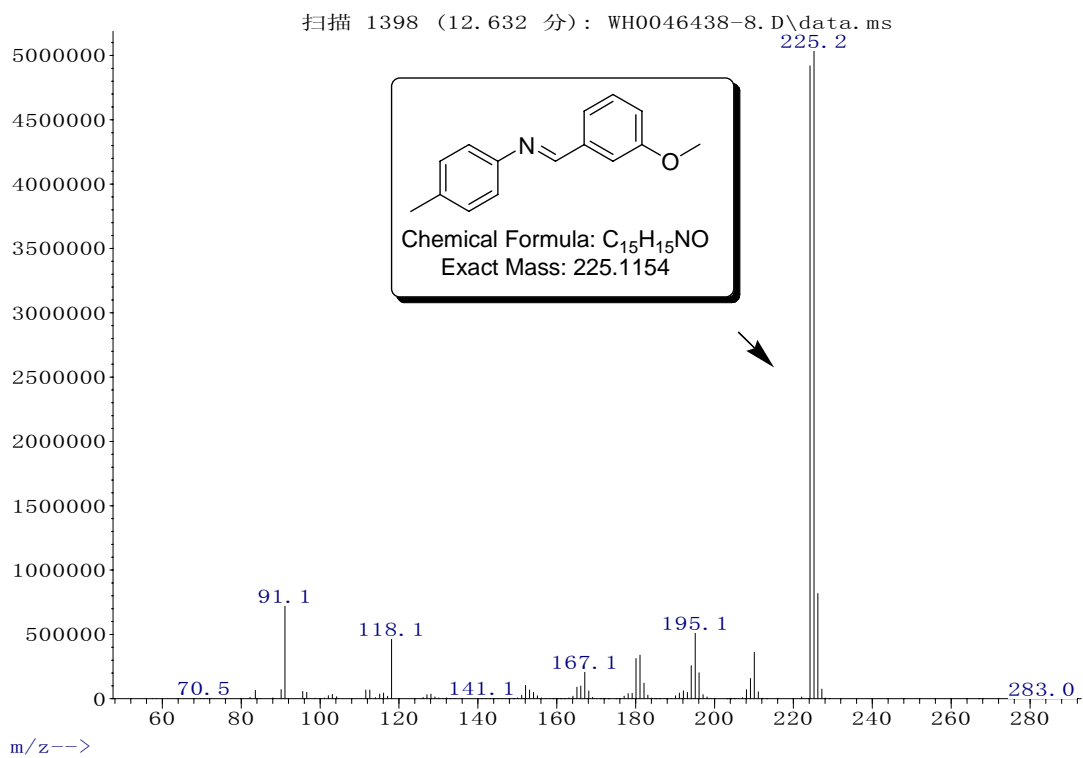



丰度

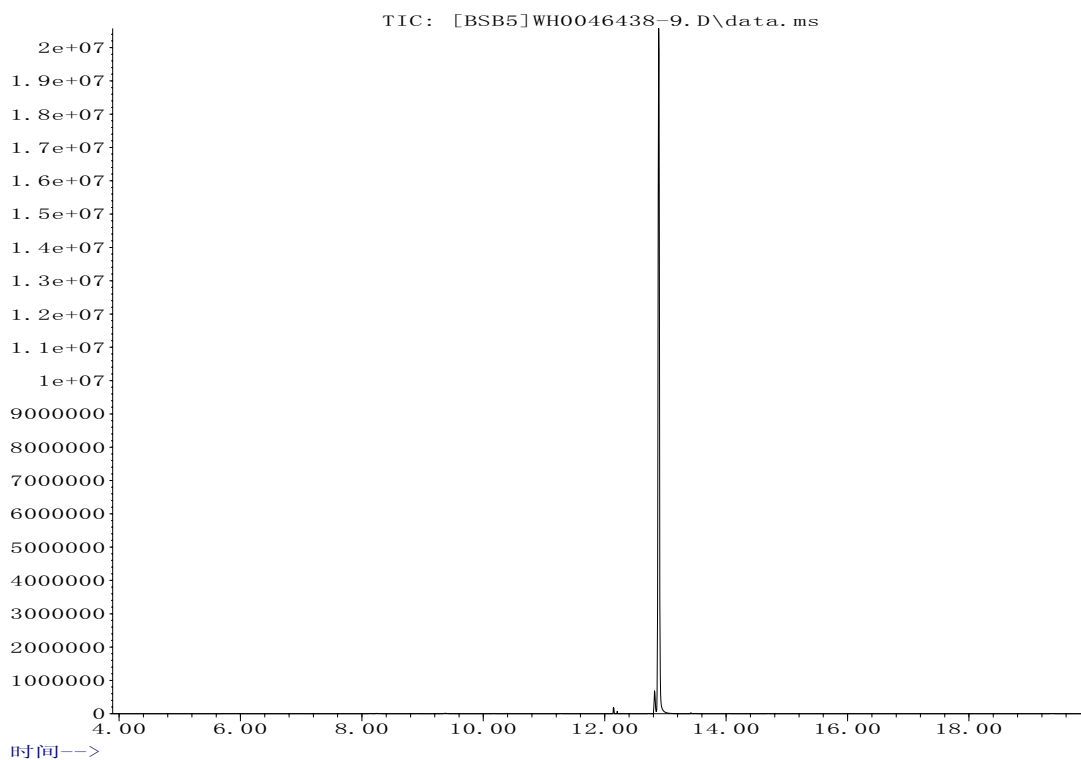

丰度

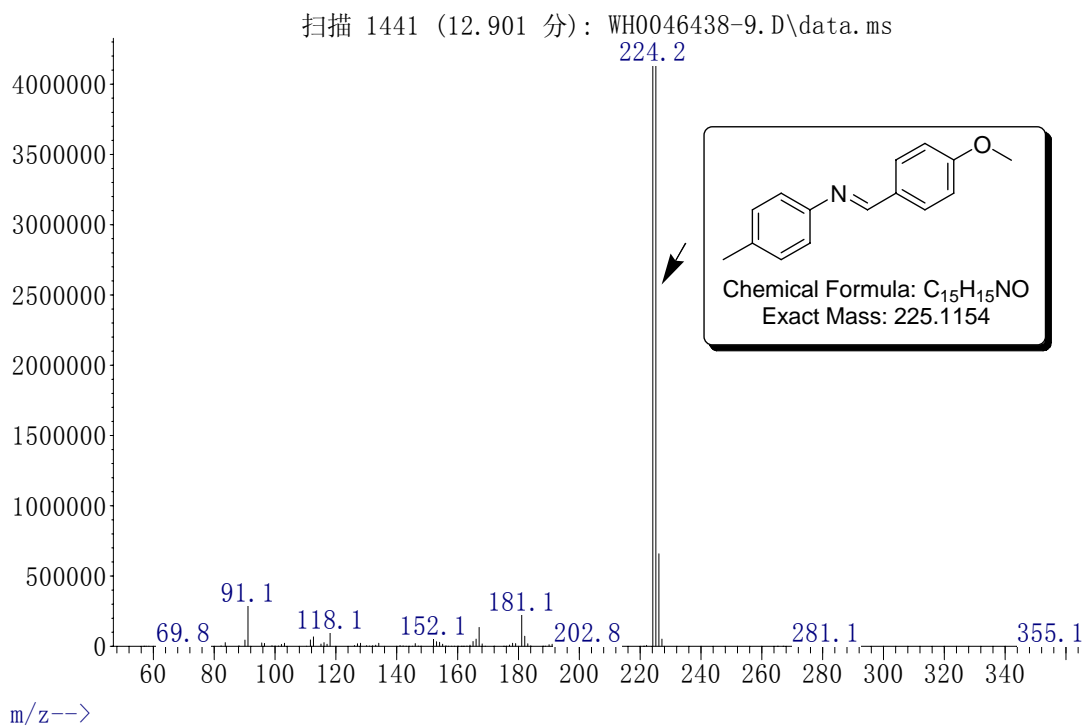

丰度

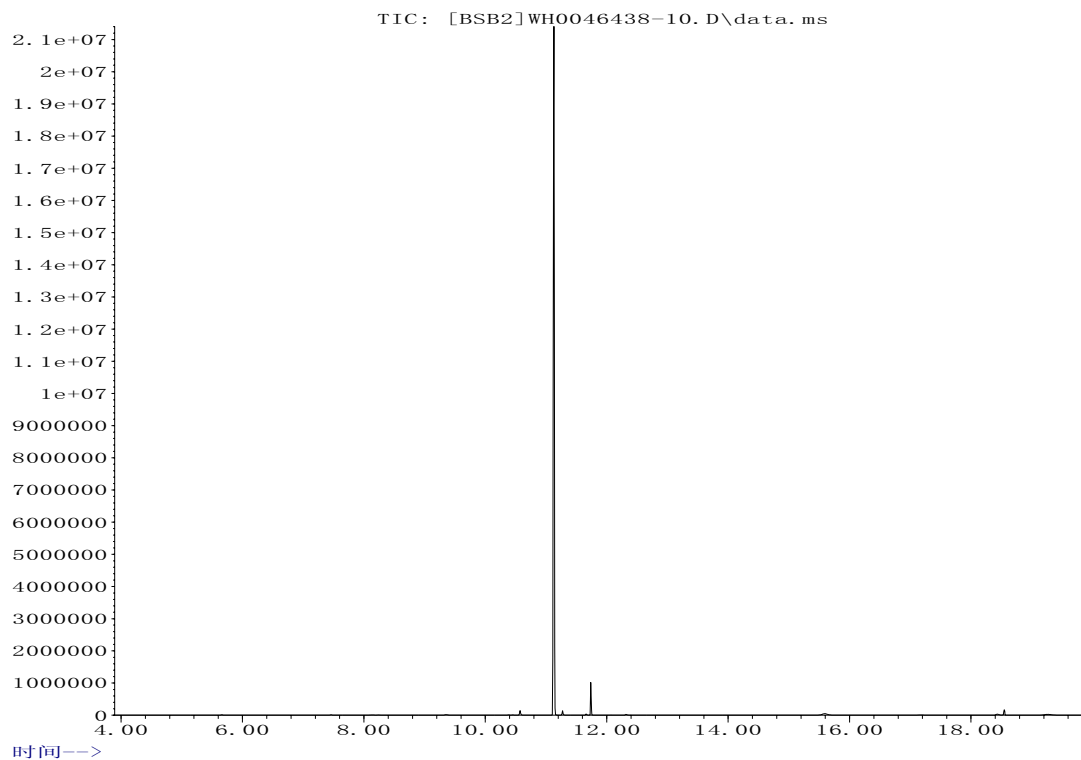

丰度

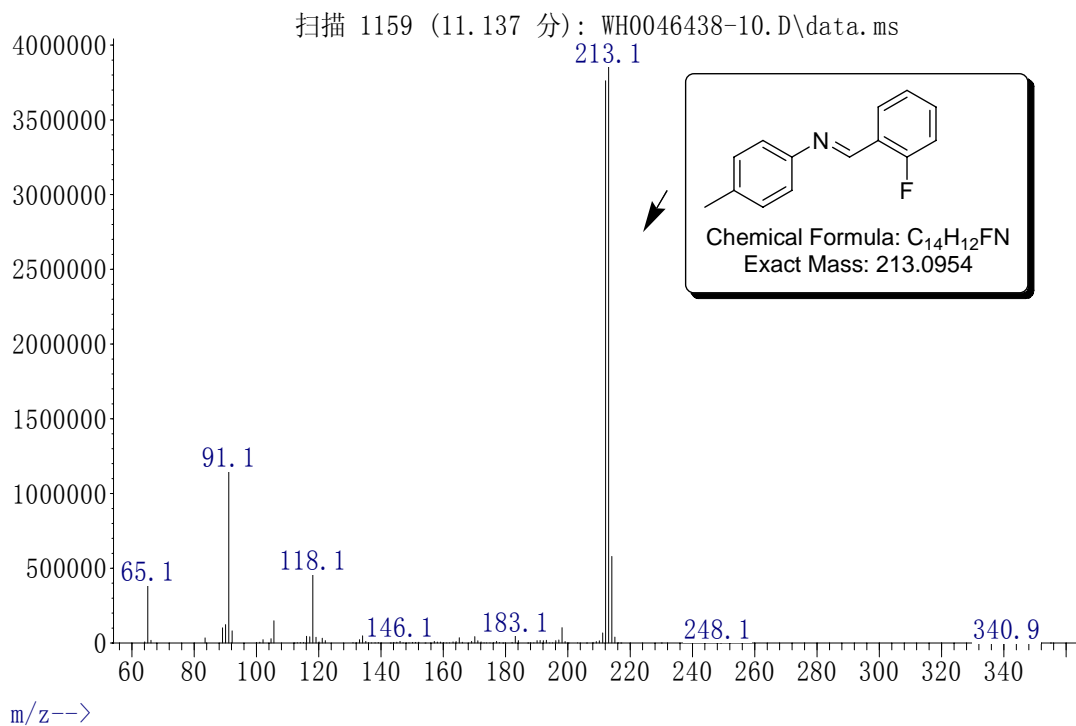

丰度

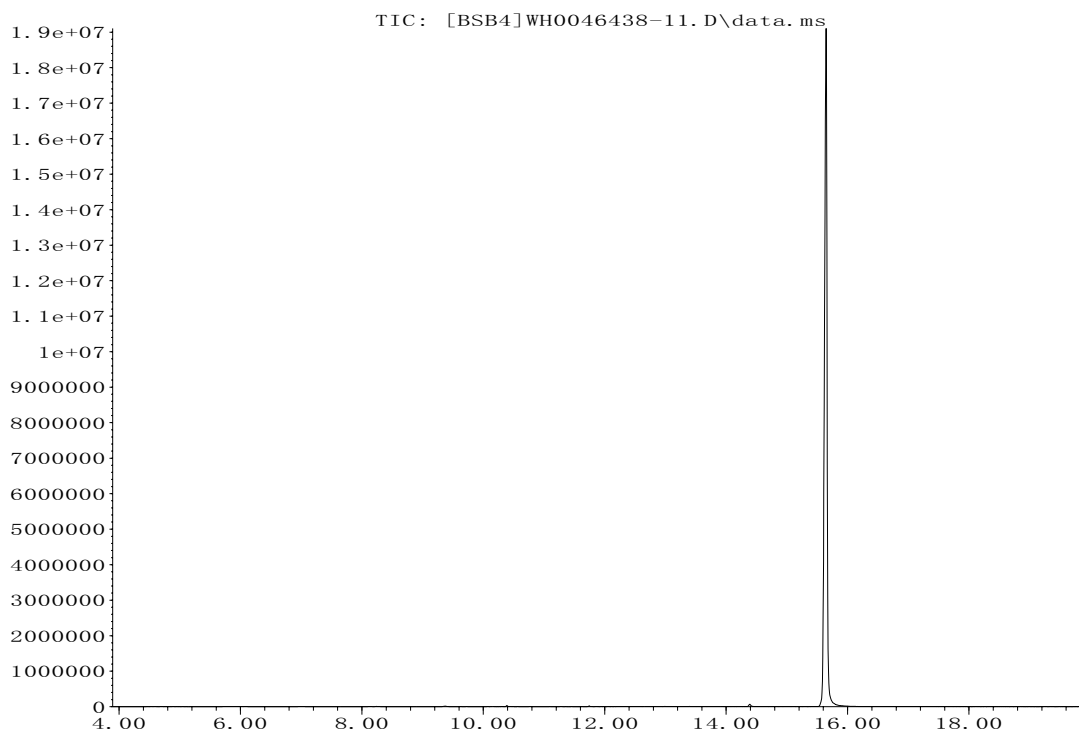

时间-->

丰度

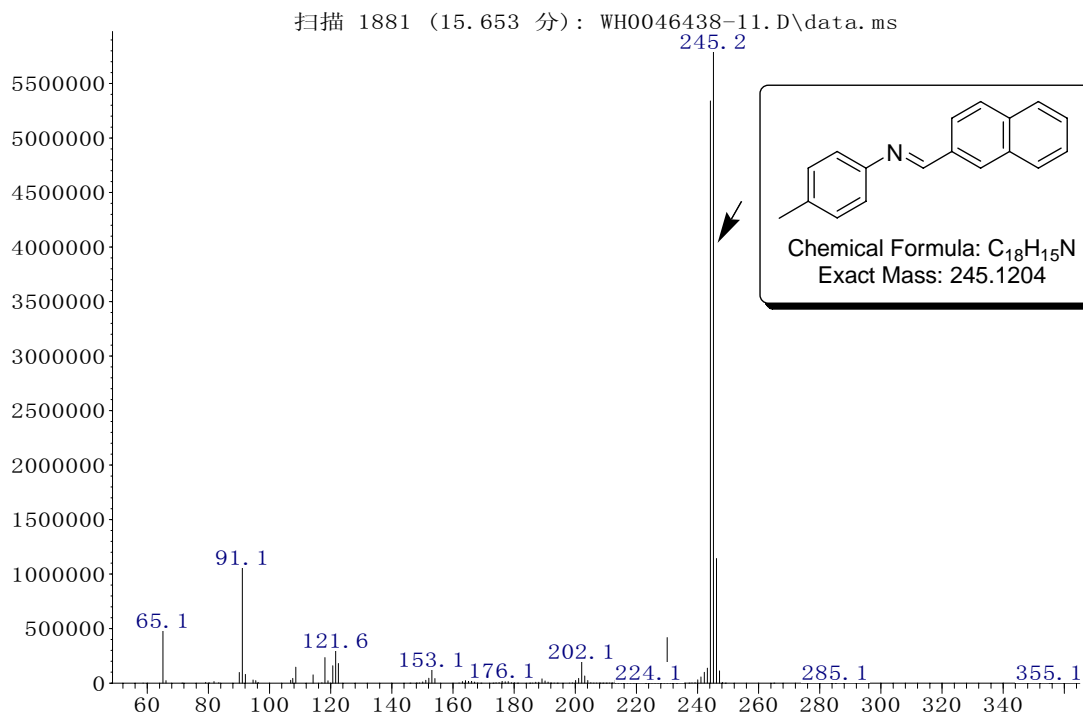

m/z-->

丰度

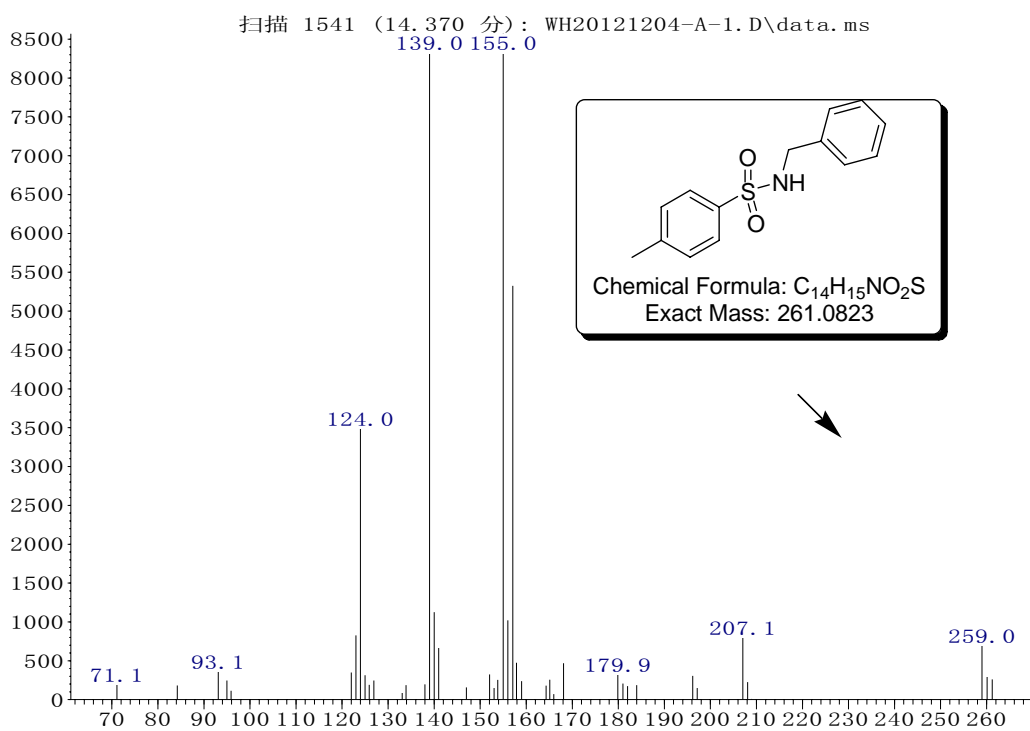

m/z-->

丰度

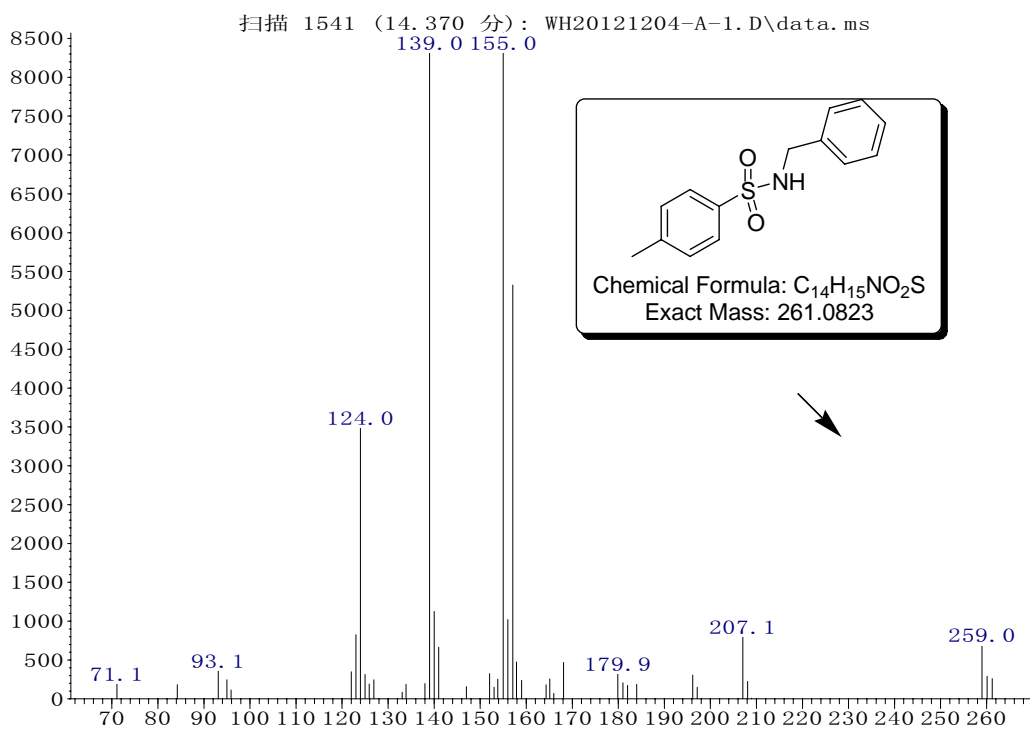

m/z-->

丰度

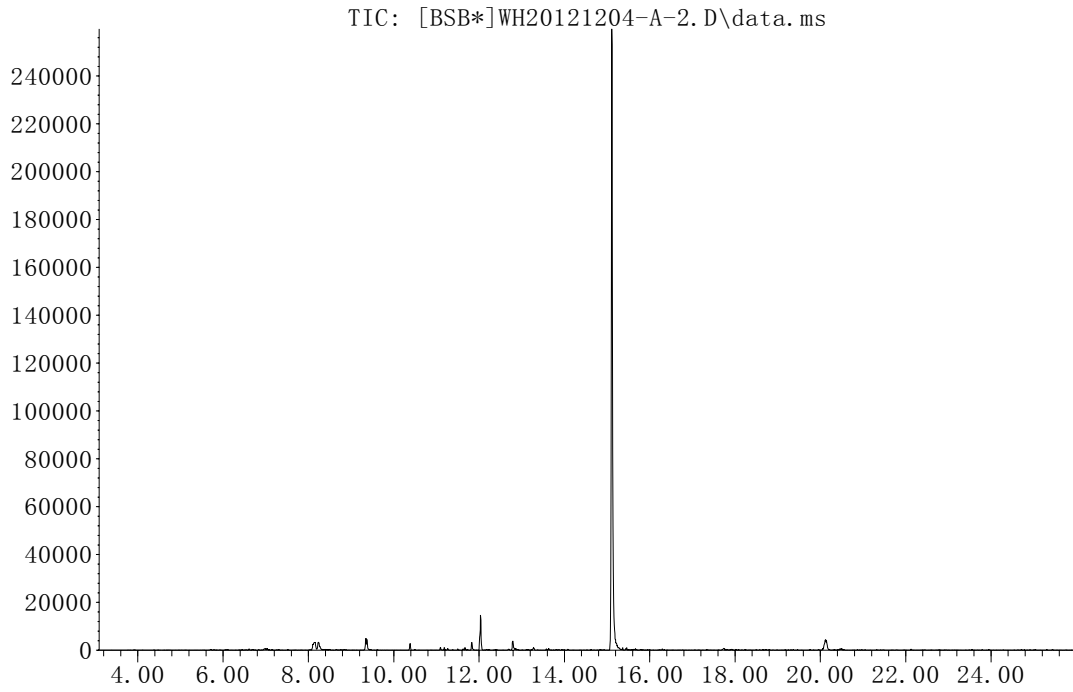

时间-->

丰度

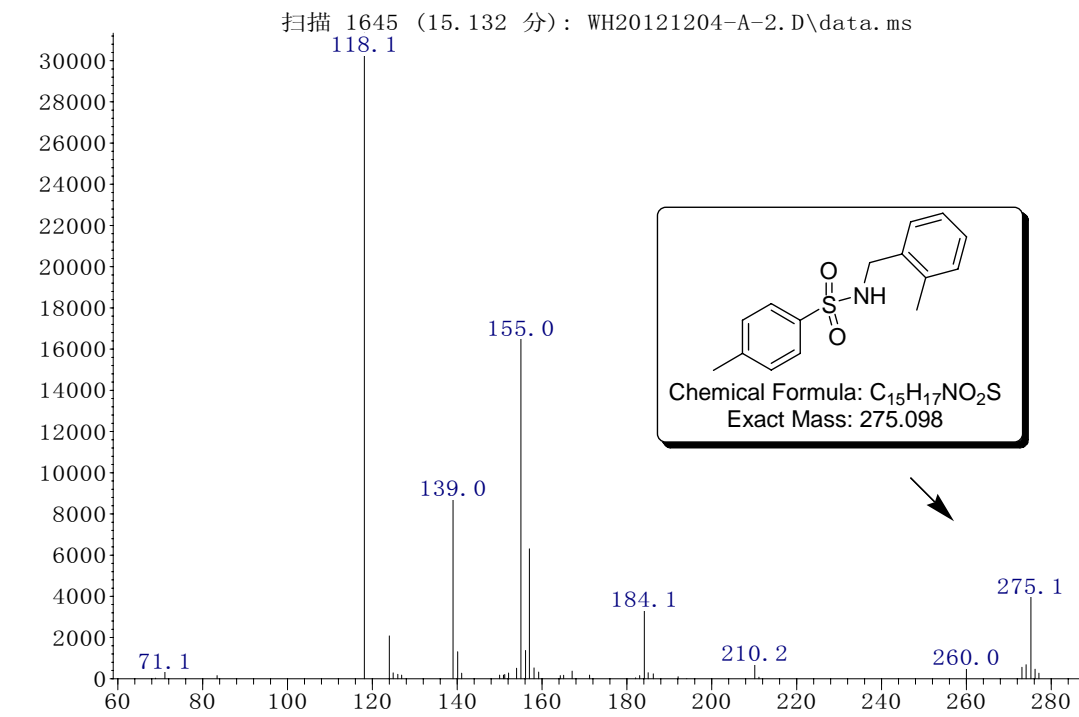

m/z-->

丰度

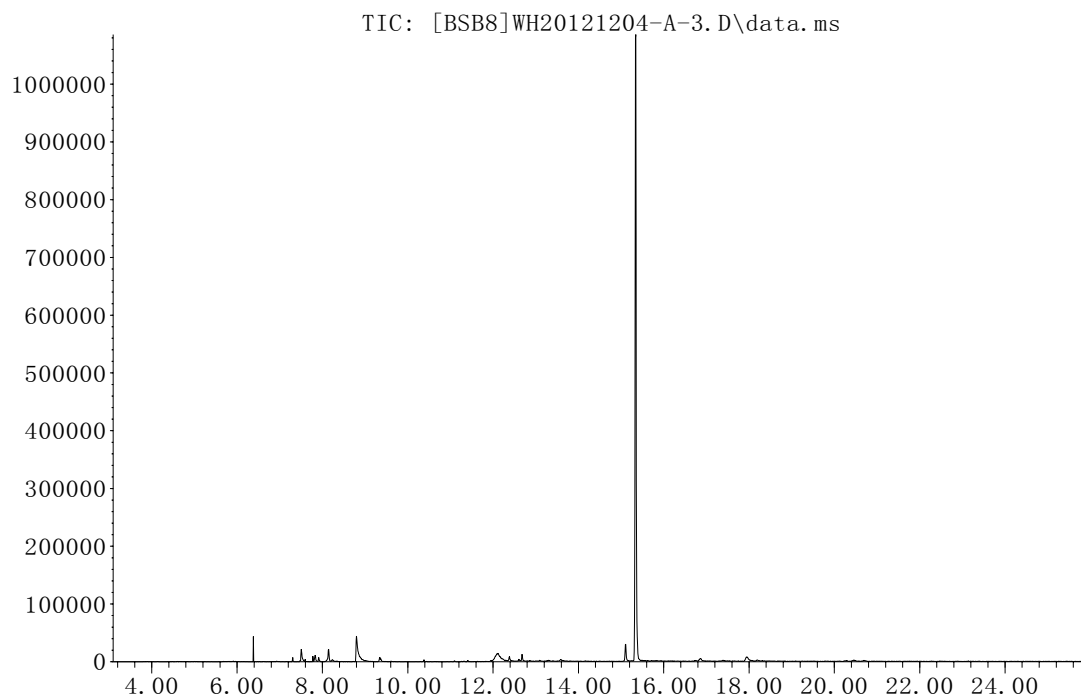

时间-->

丰度

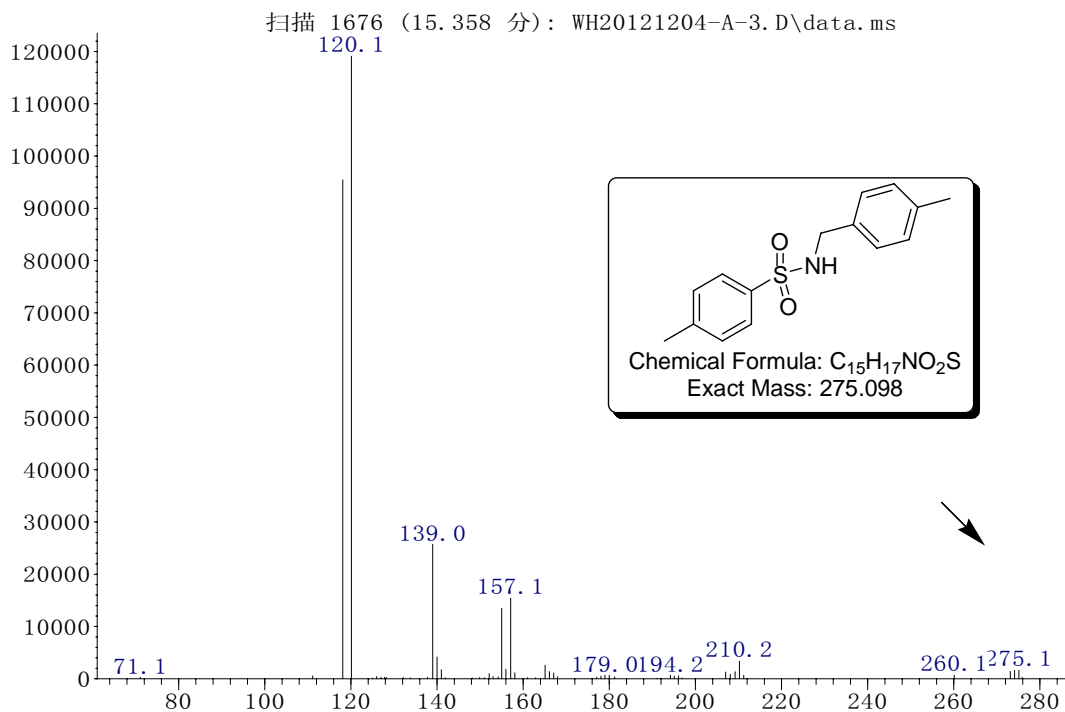

m/z-->

丰度

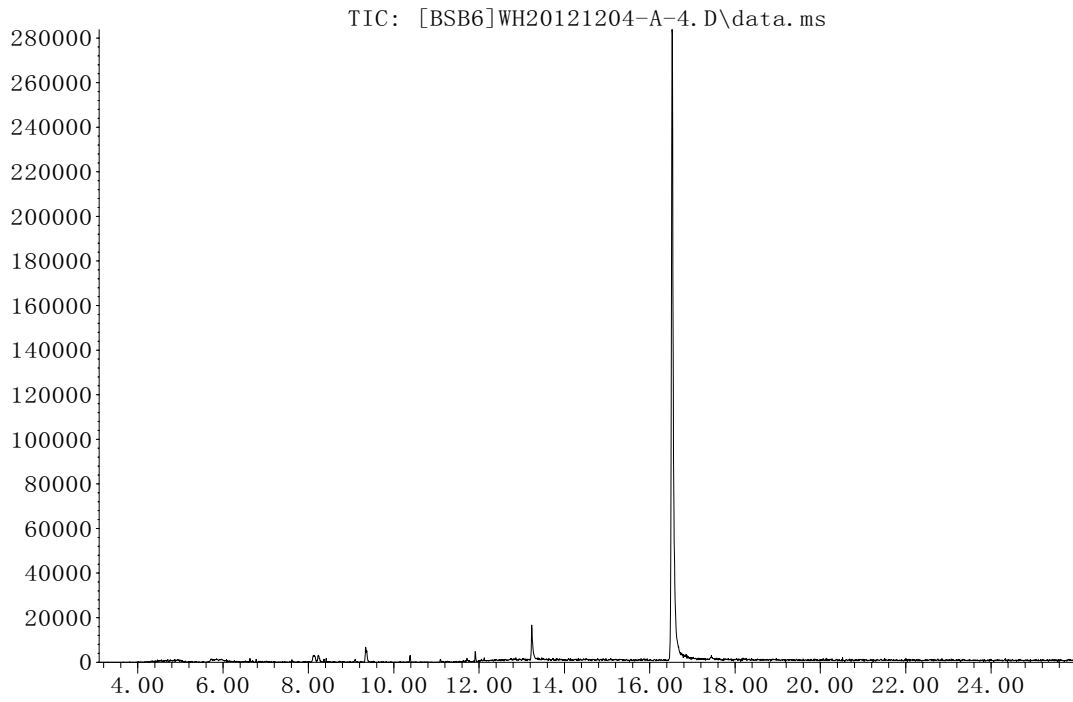

时间-->

丰度

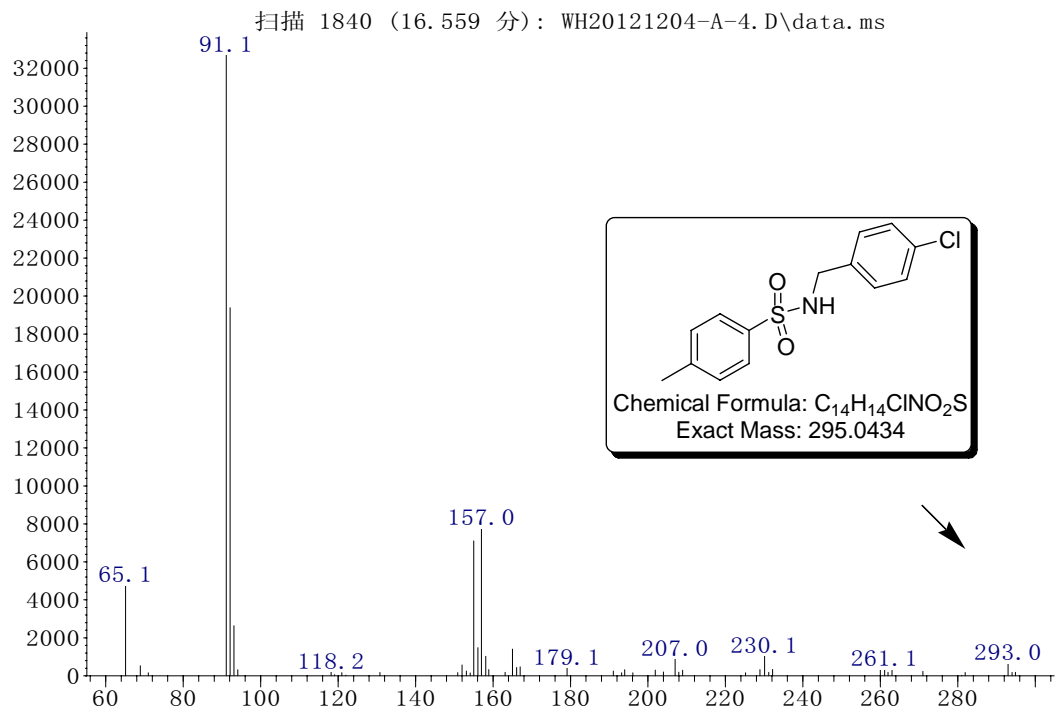

m/z-->

丰度

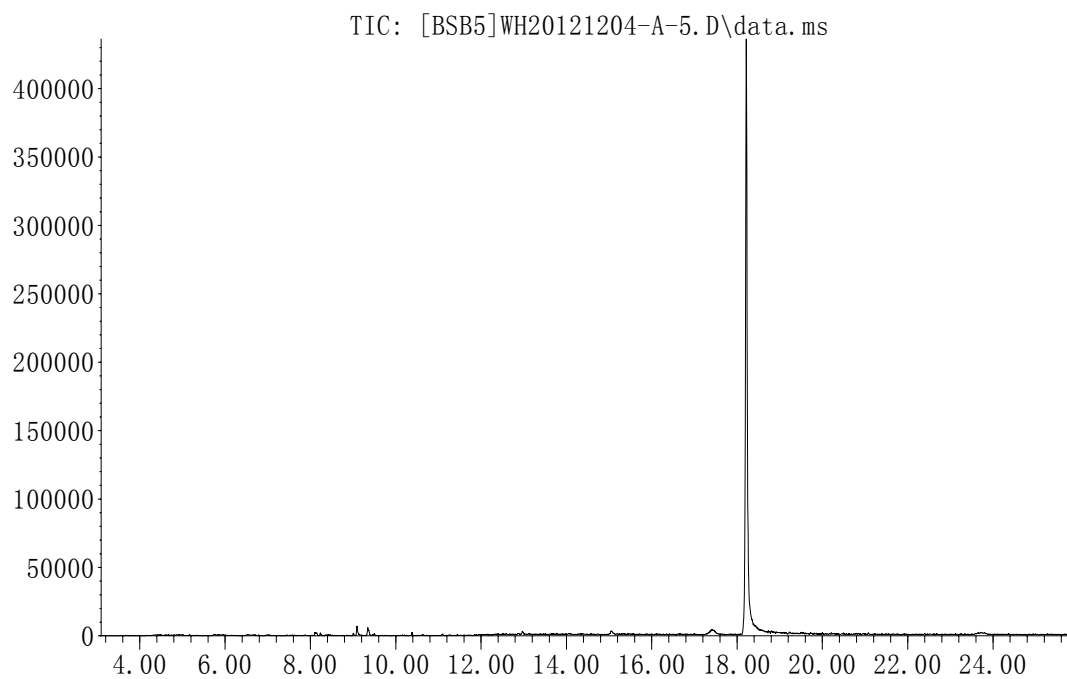

时间-->

丰度

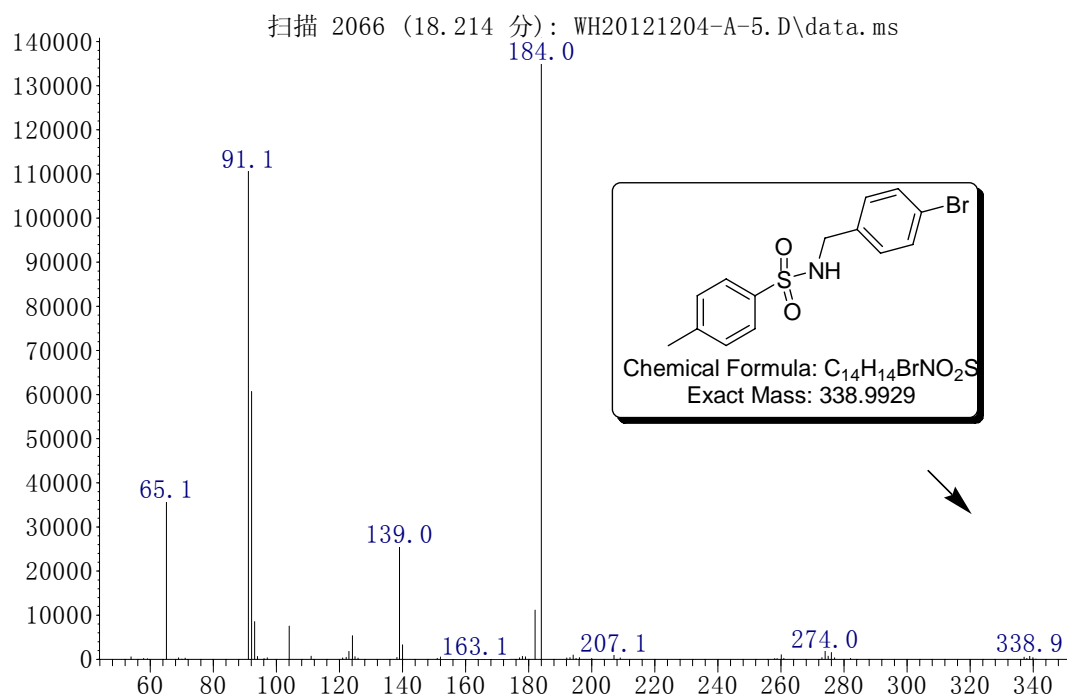

m/z-->



丰度

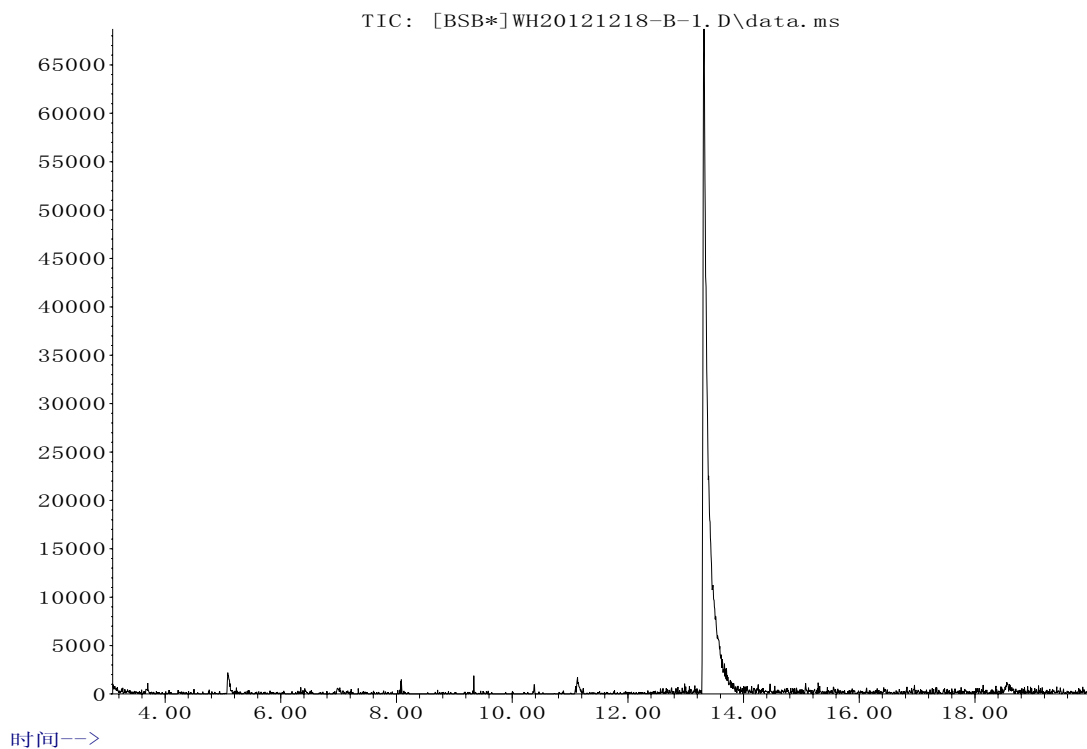

丰度

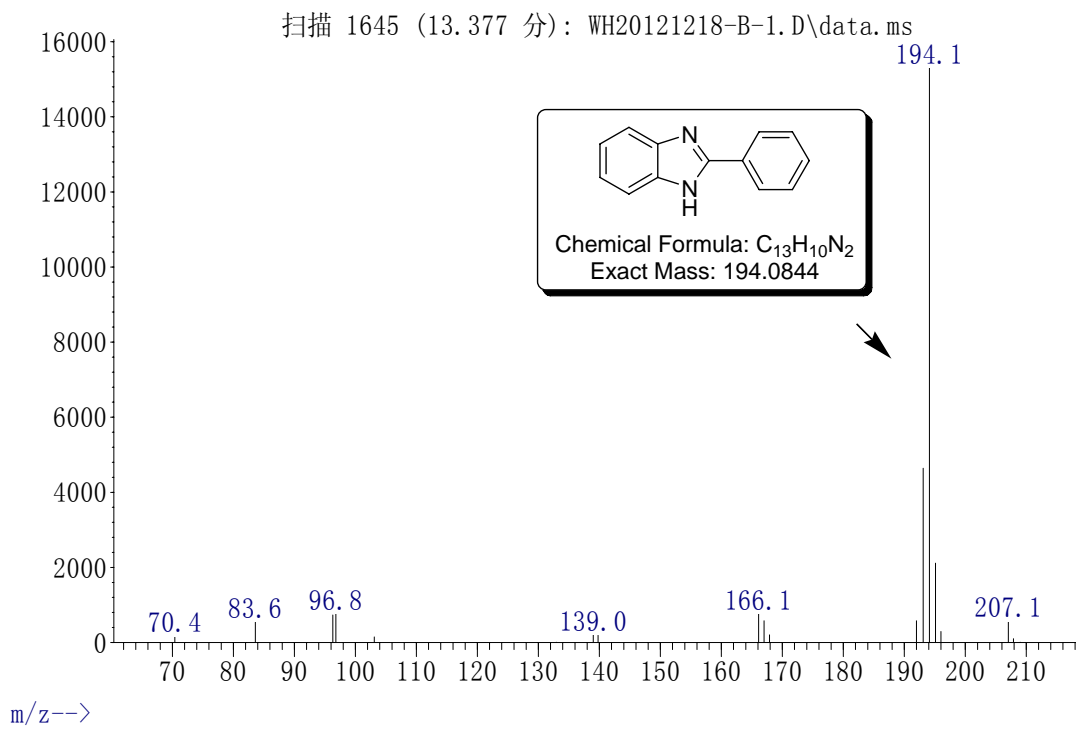

丰度

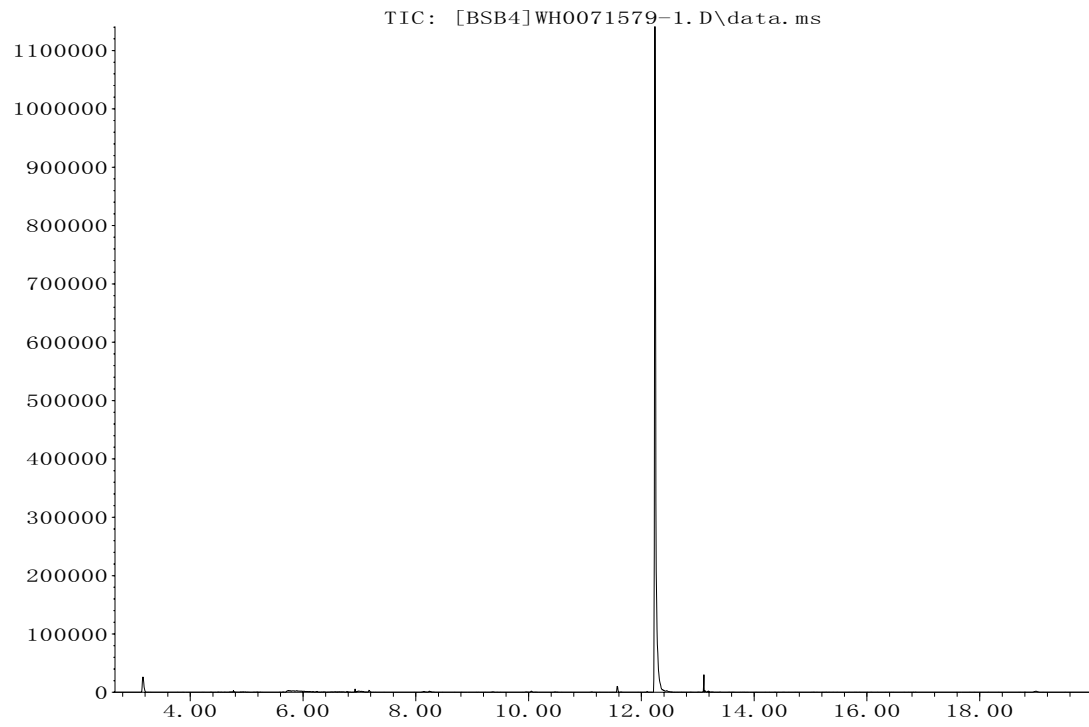

时间-->

丰度

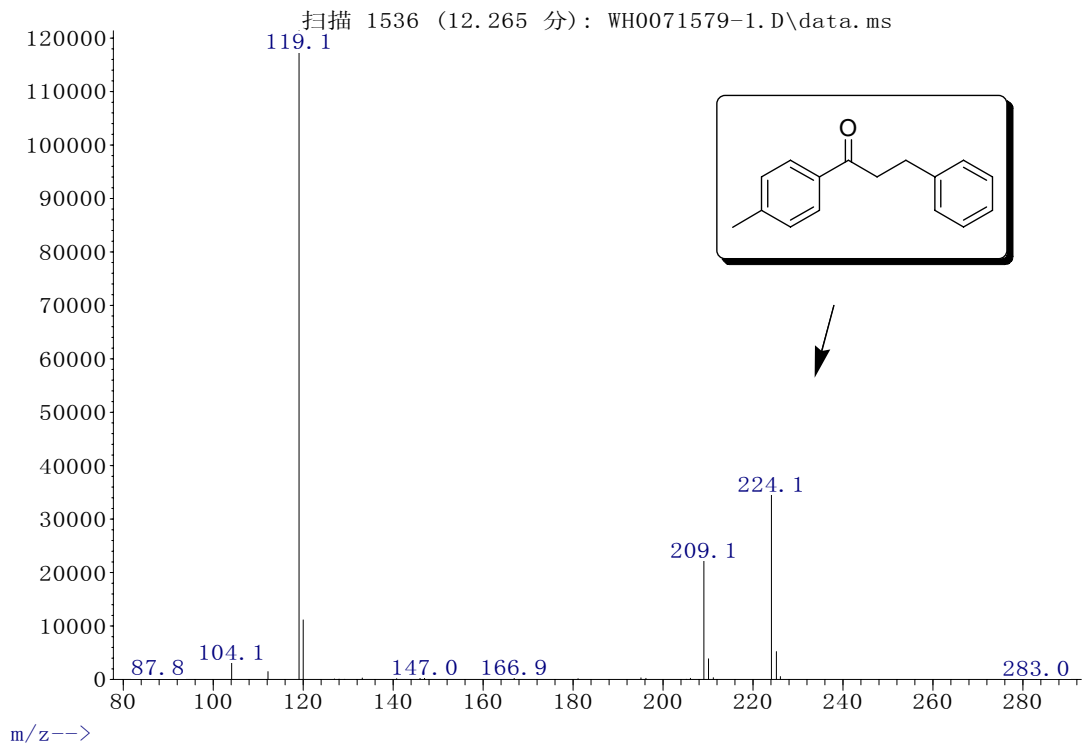

丰度

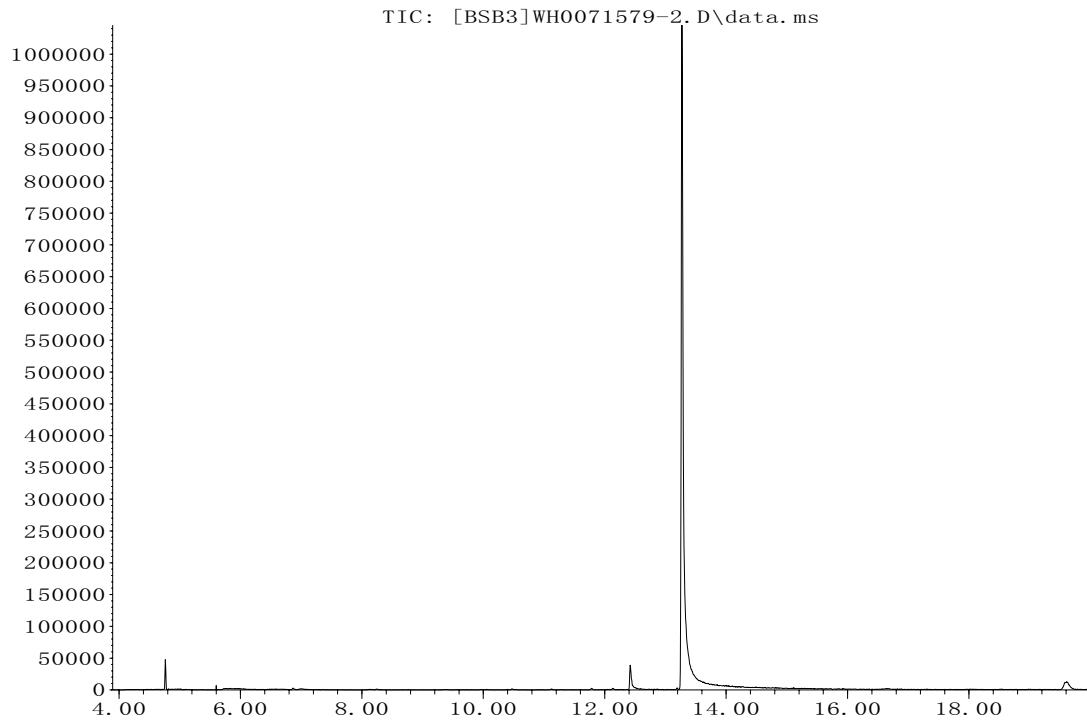

时间-->

丰度

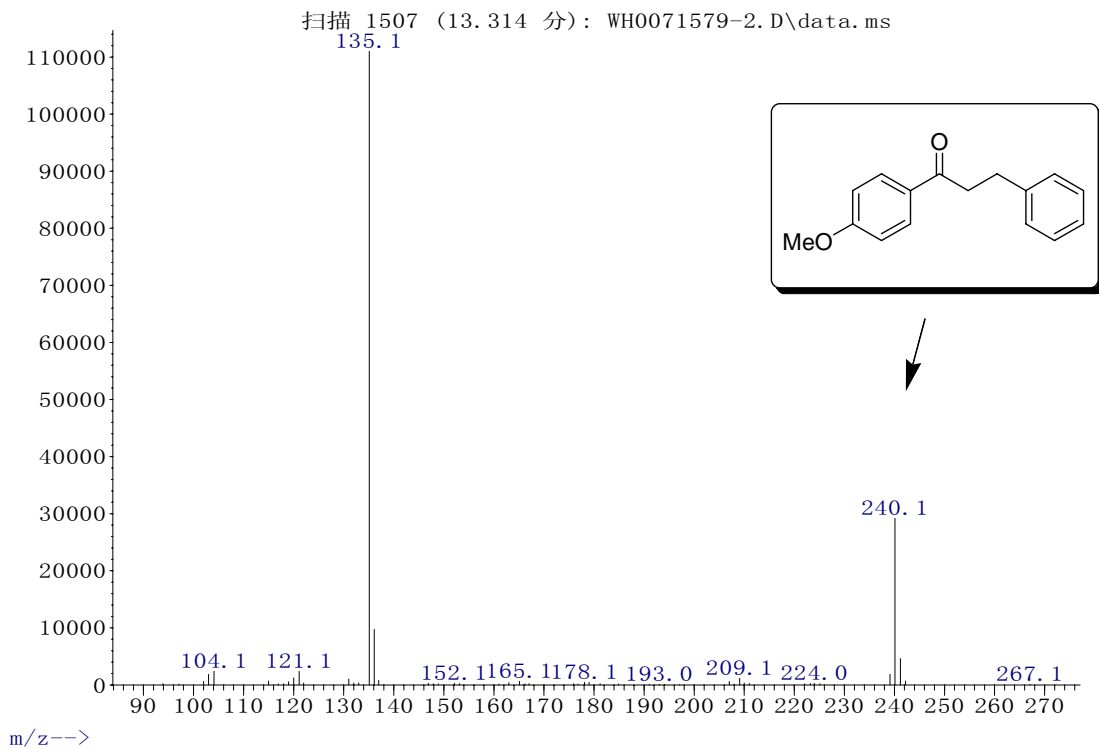

丰度

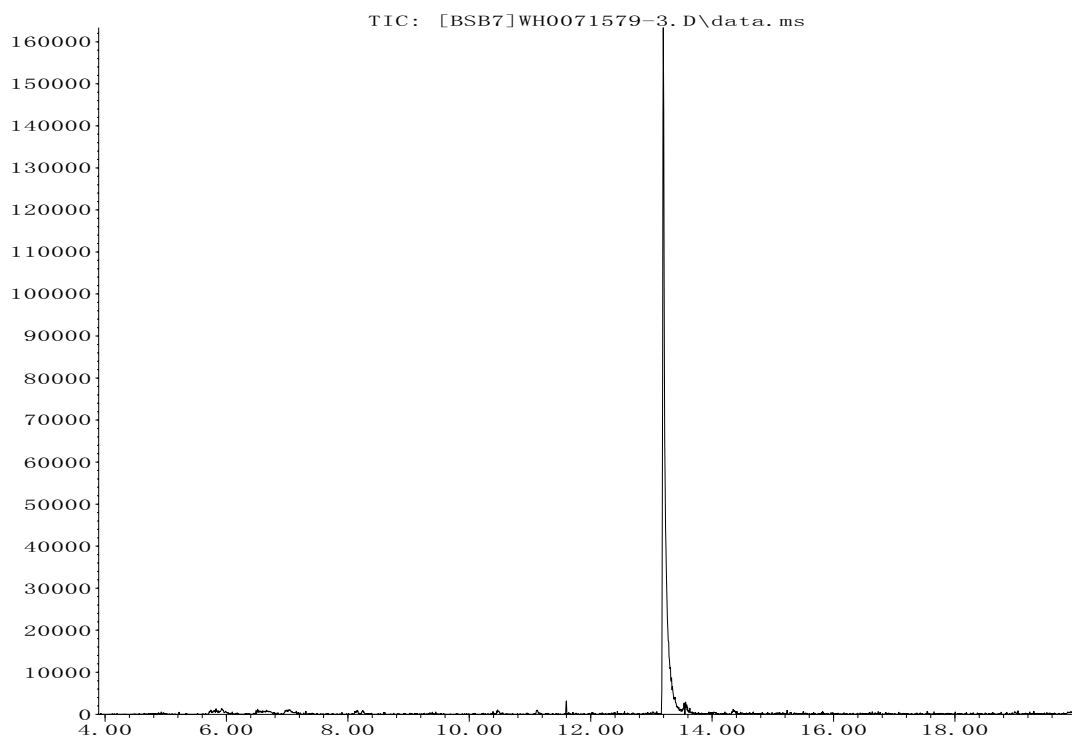

时间-->

丰度

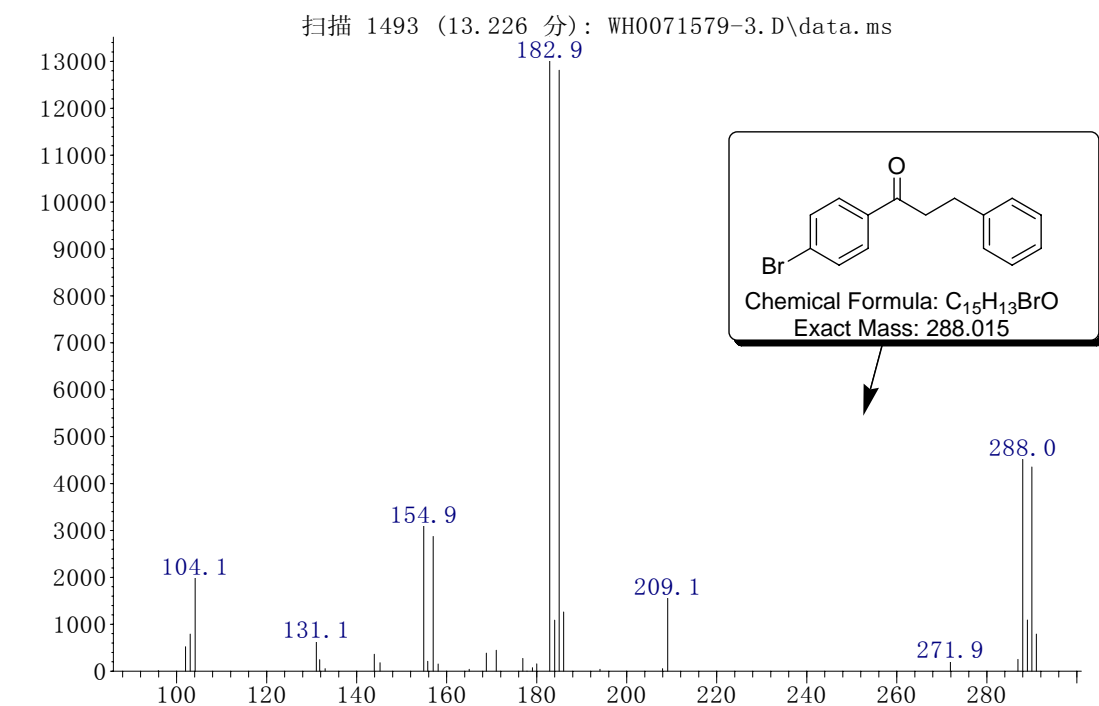

m/z-->

丰度

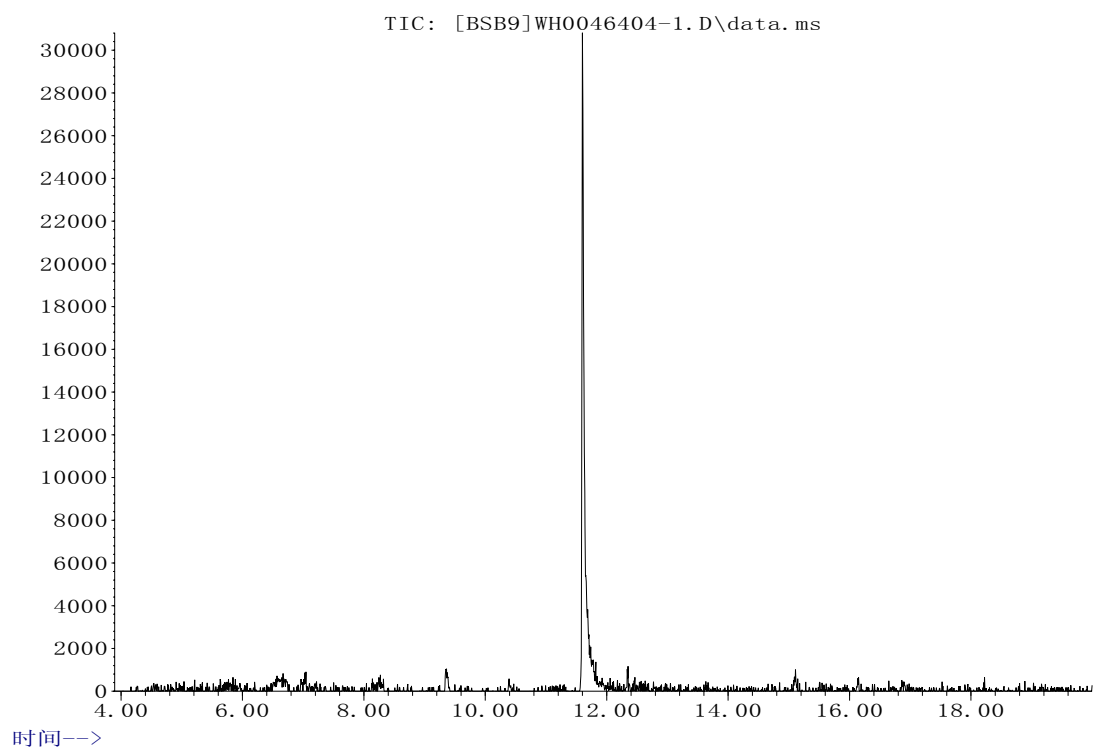

丰度

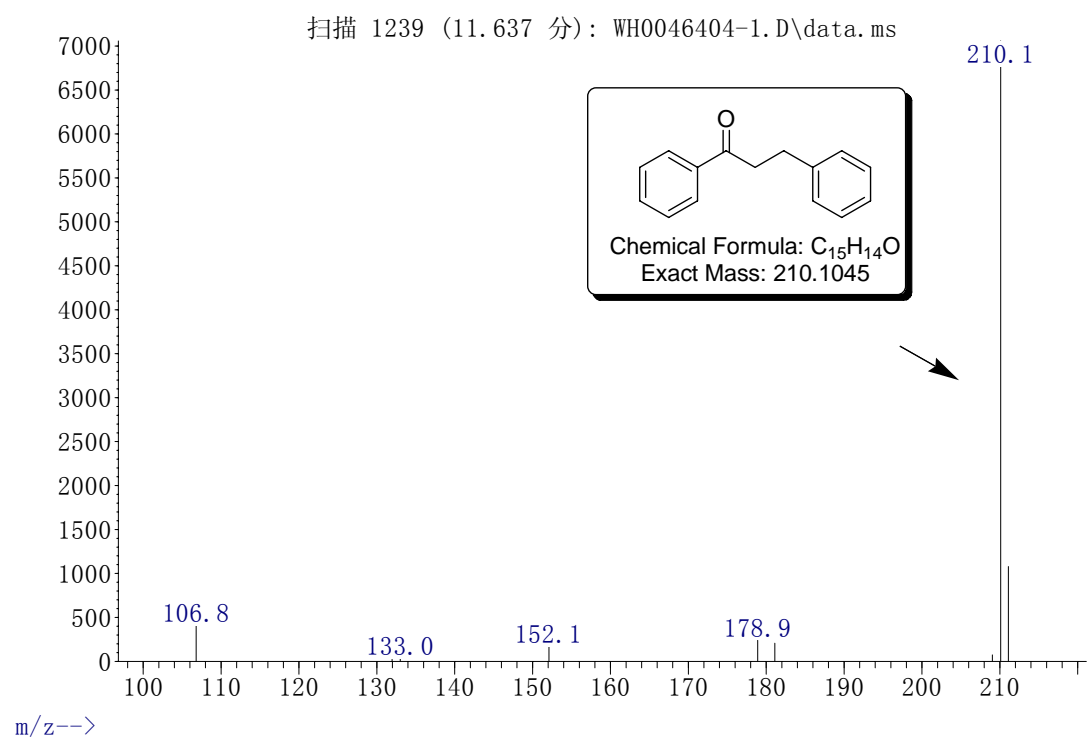

丰度

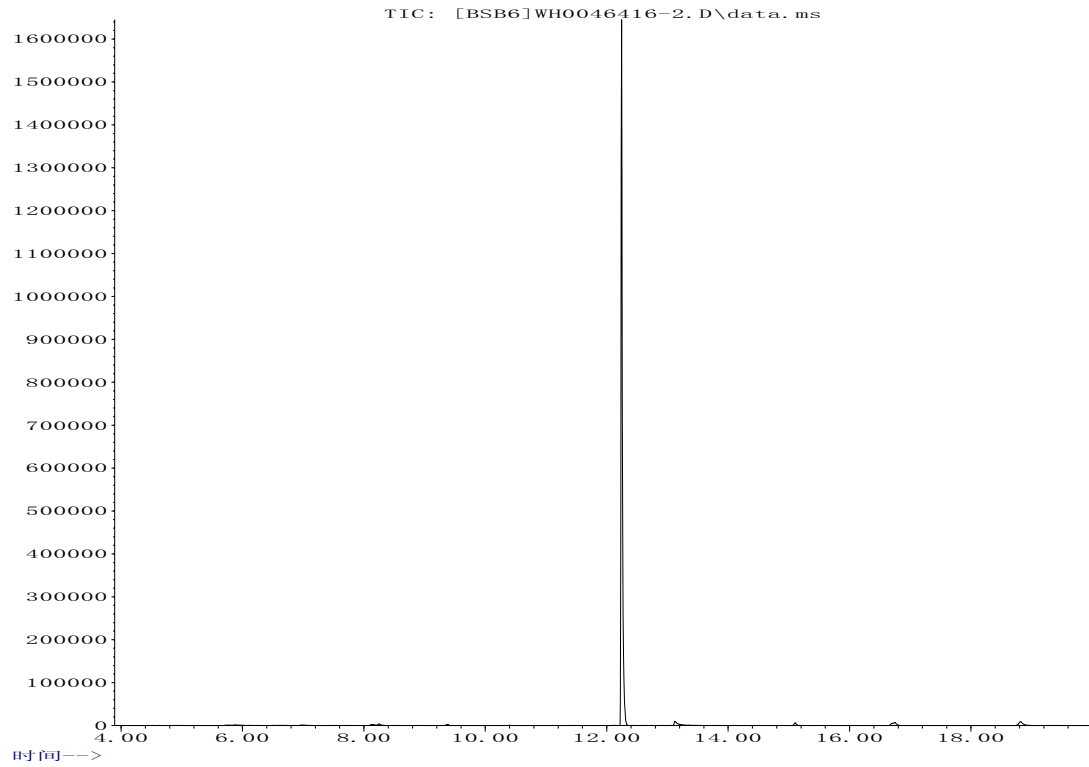

丰度

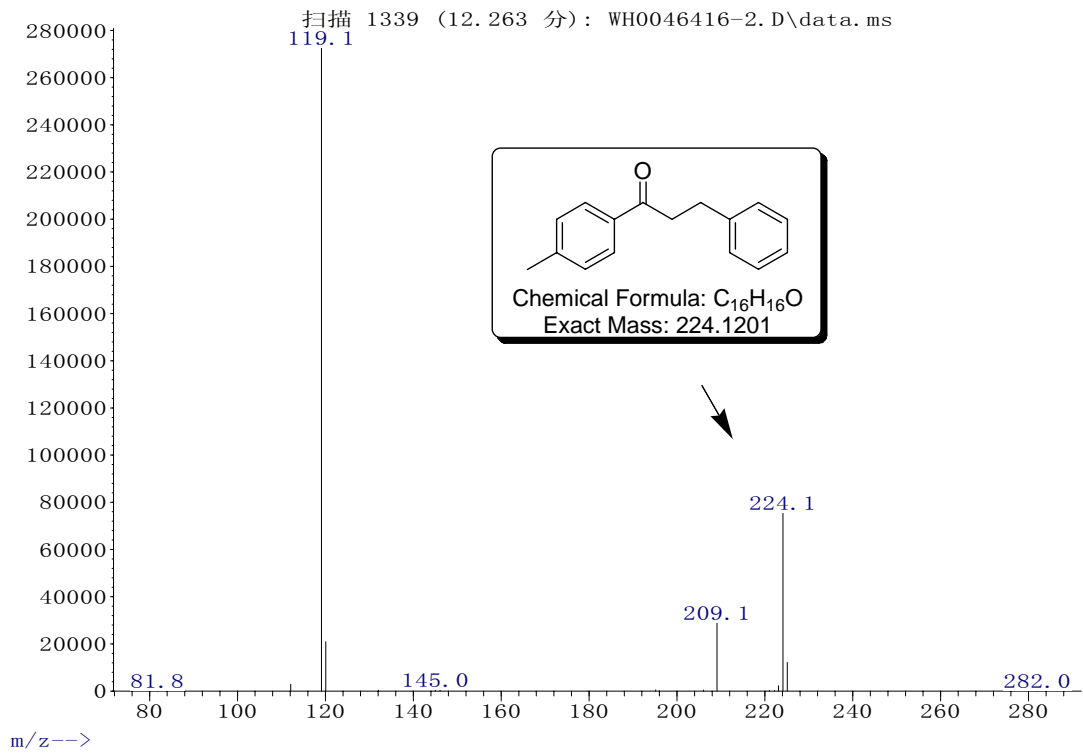

丰度

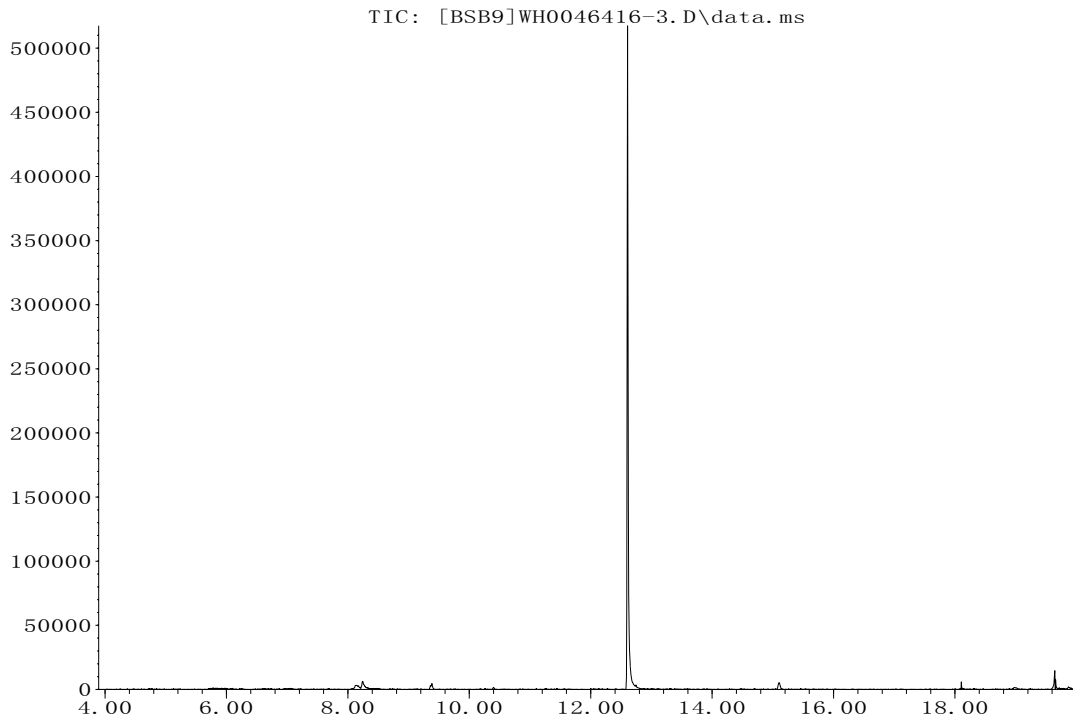

时间-->

丰度

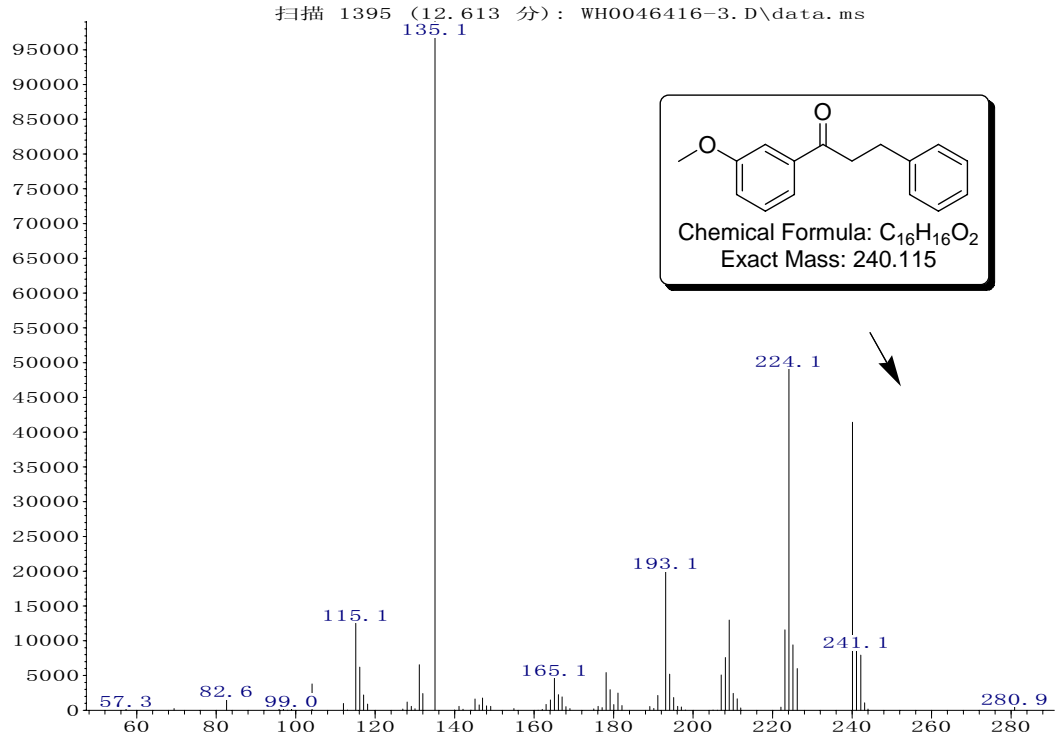

m/z-->

丰度

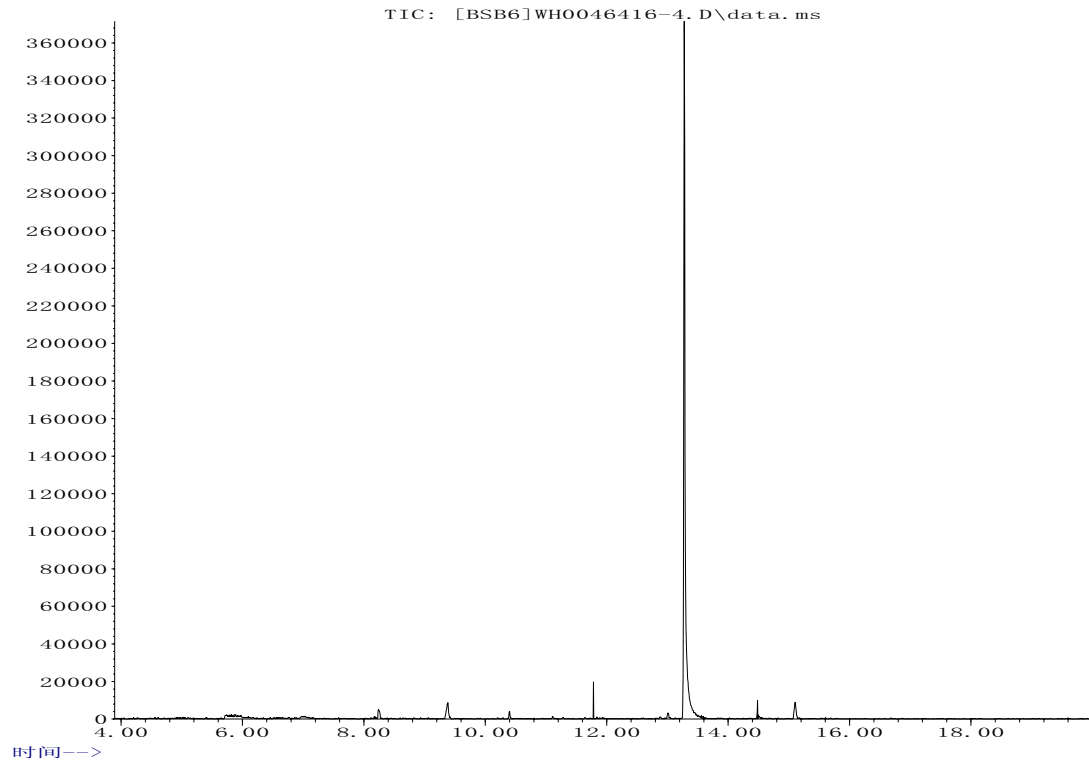

丰度

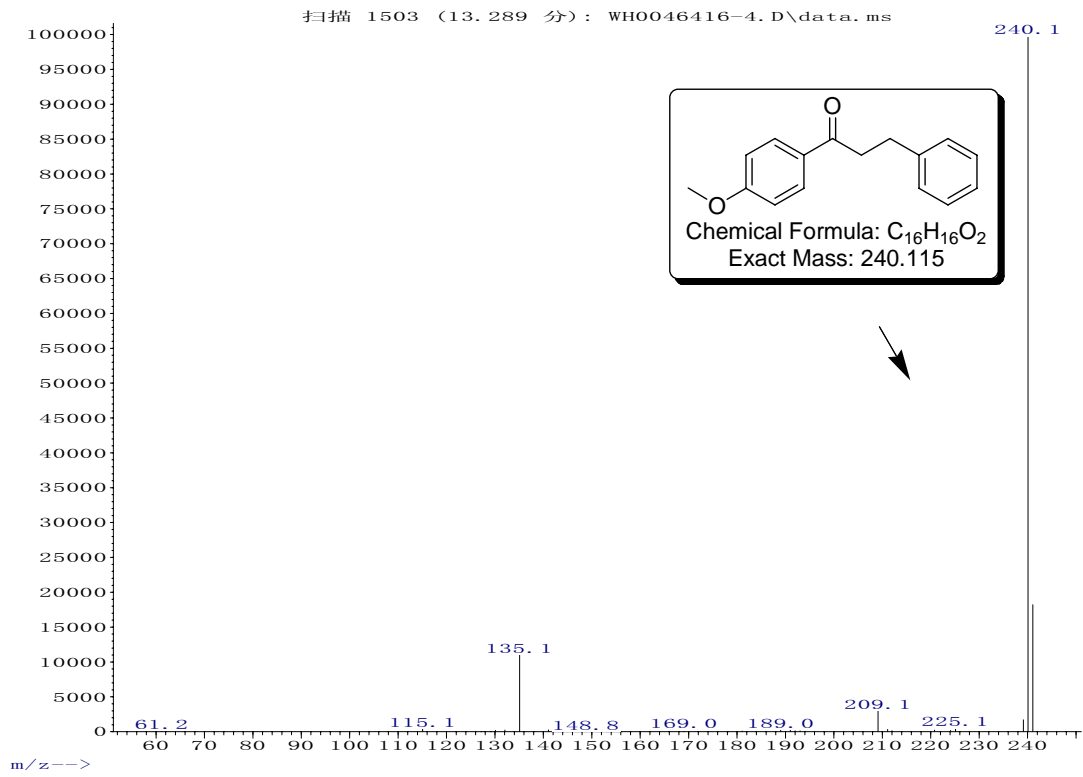



丰度

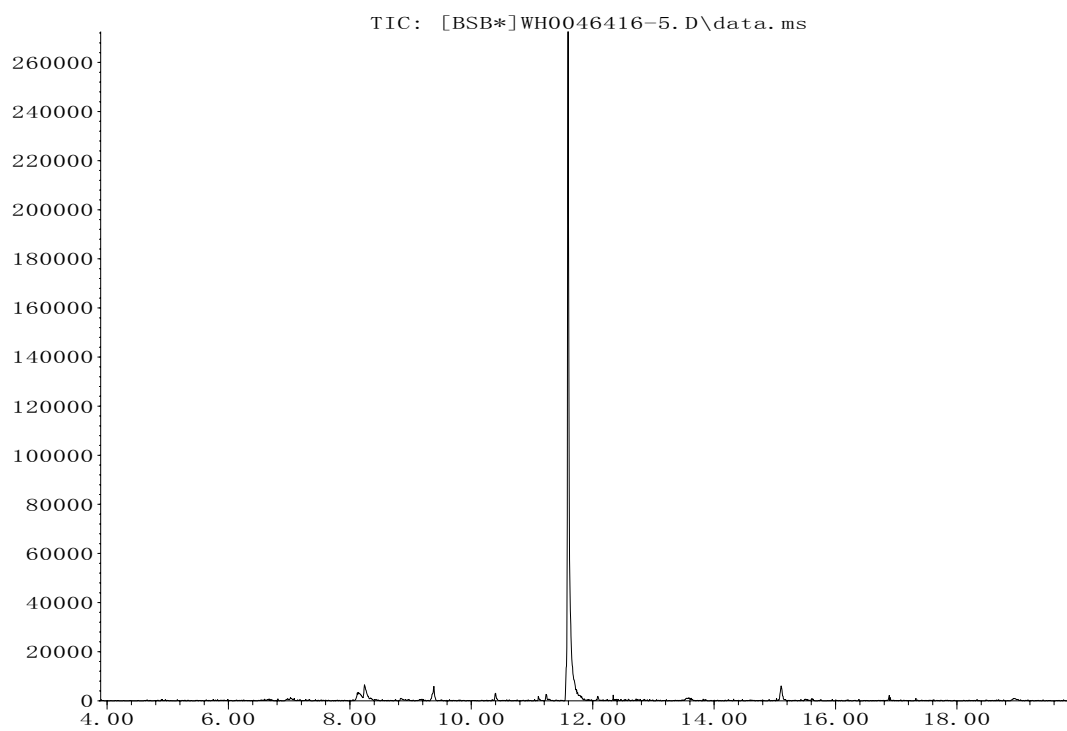

时间-->

丰度

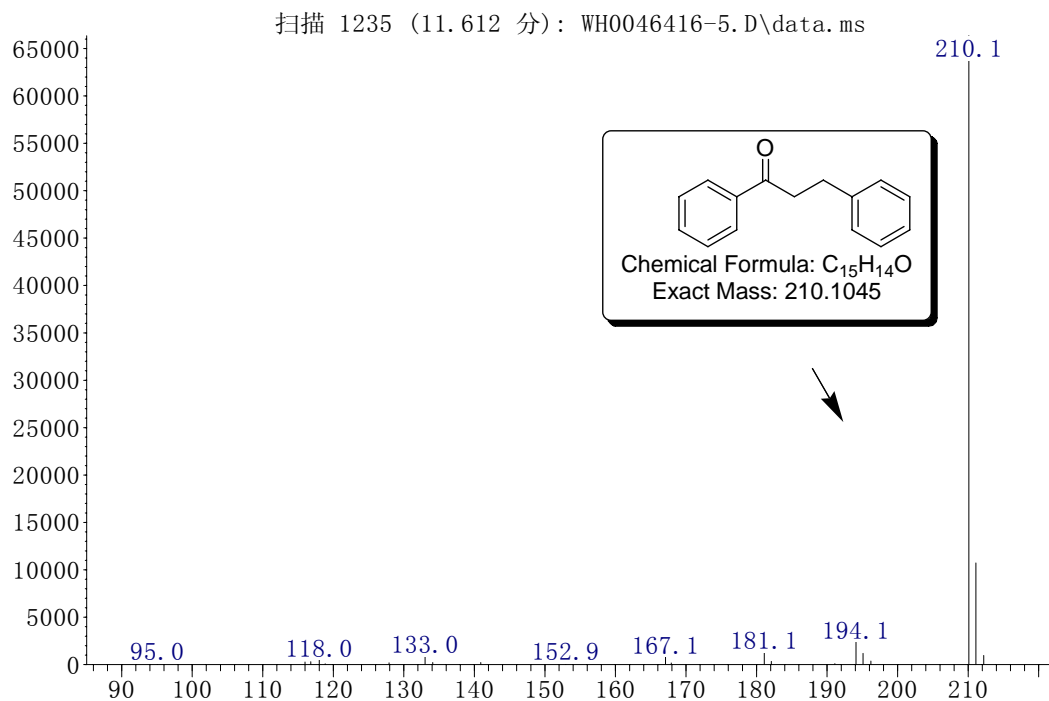

m/z-->

丰度

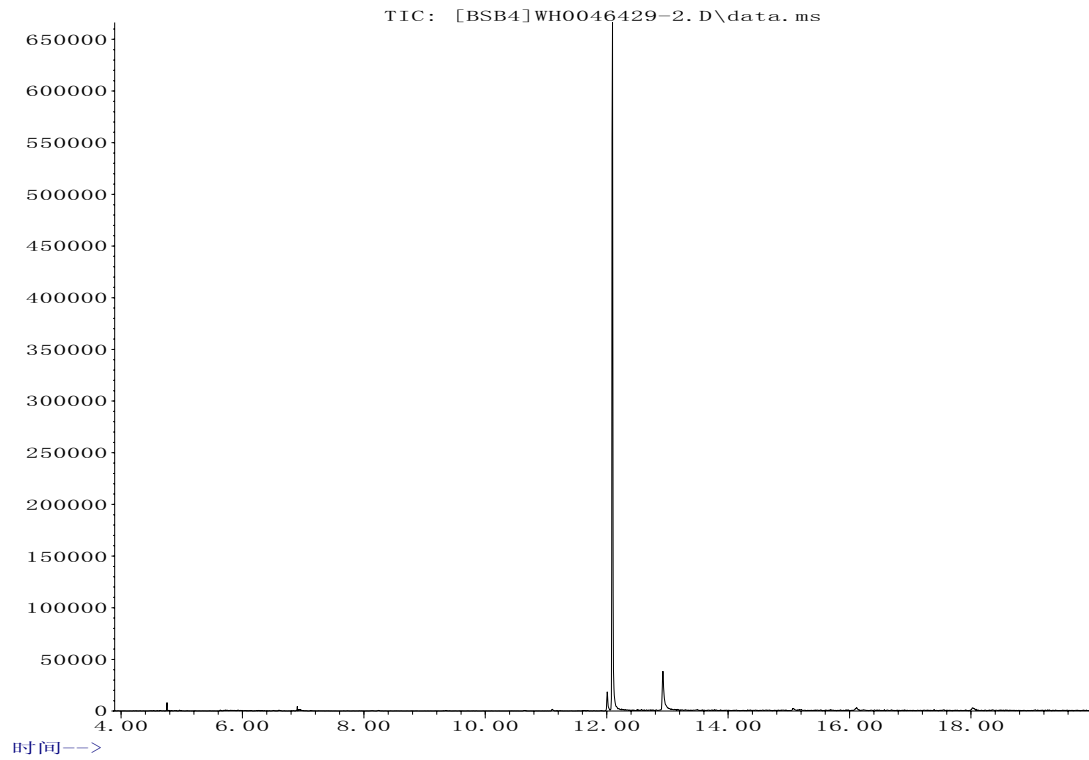

丰度

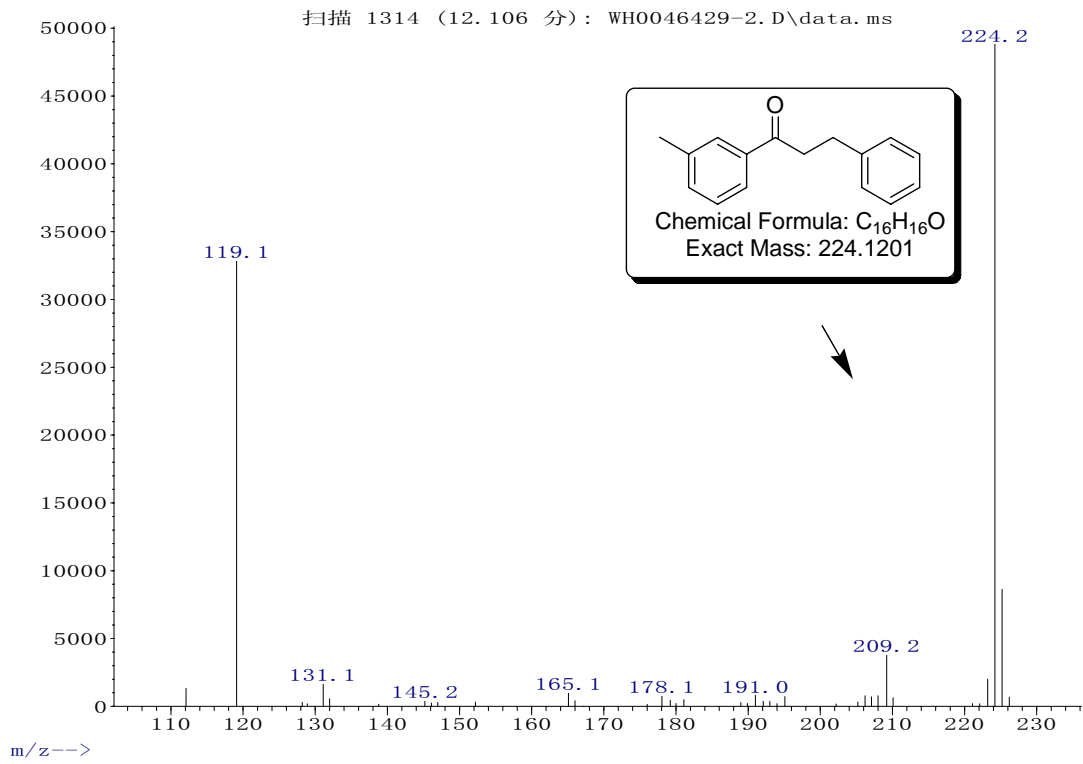

丰度

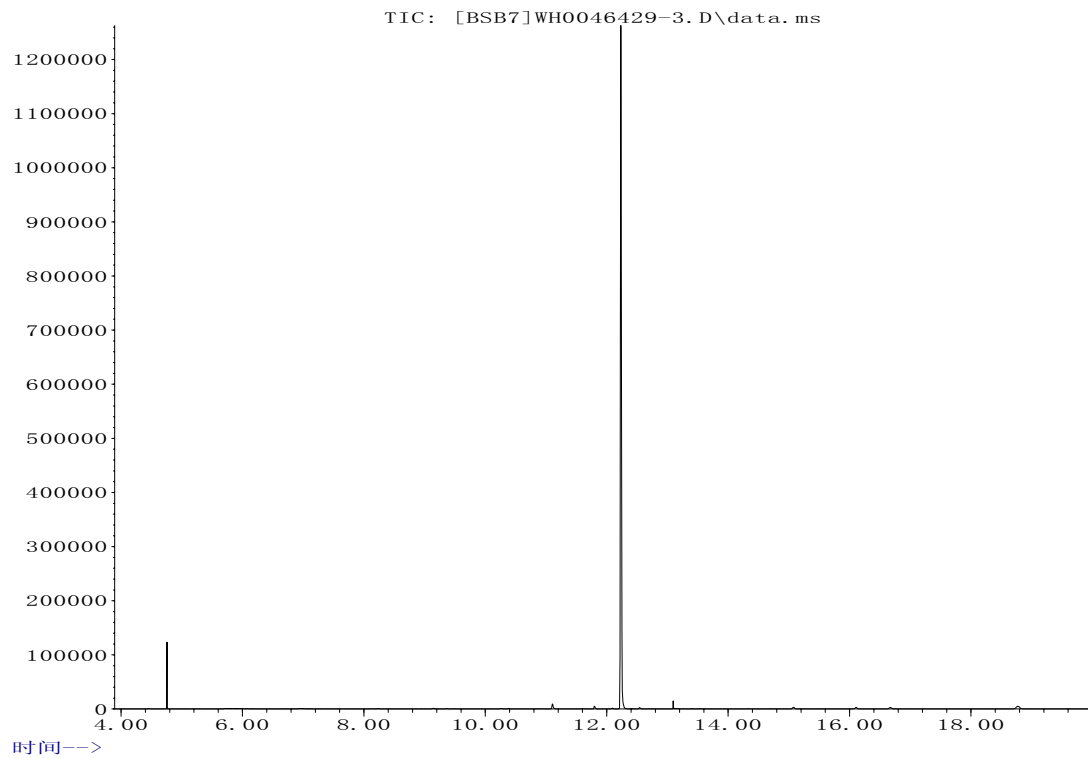

丰度

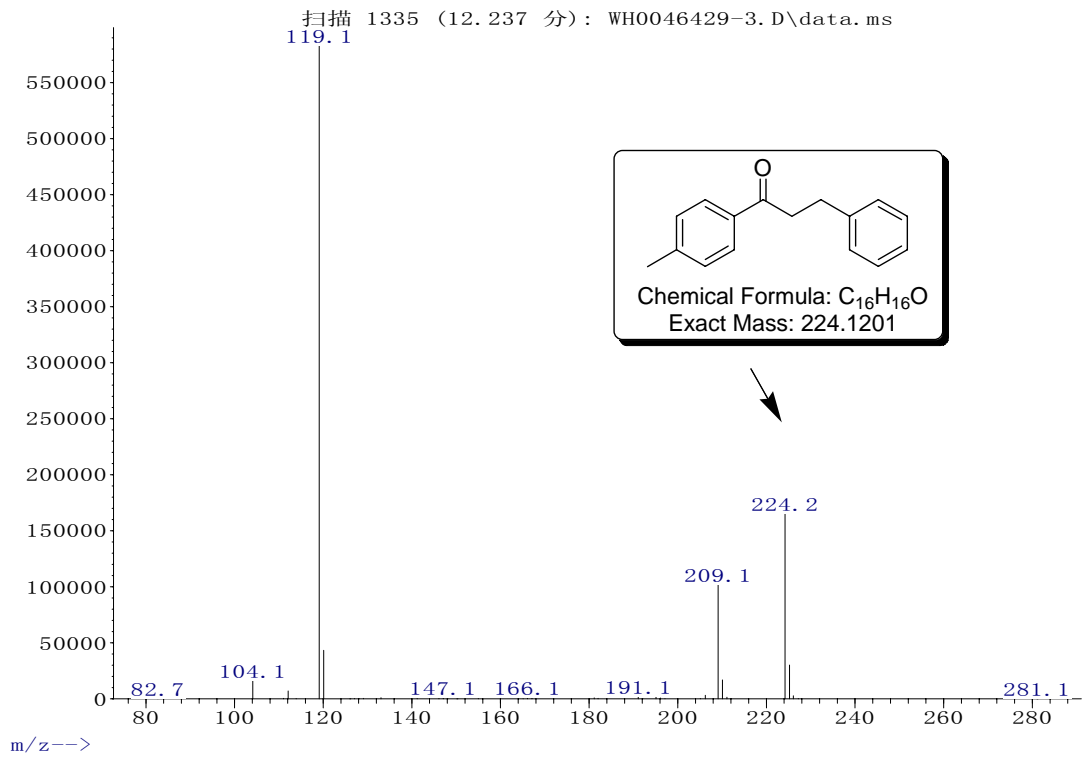

丰度

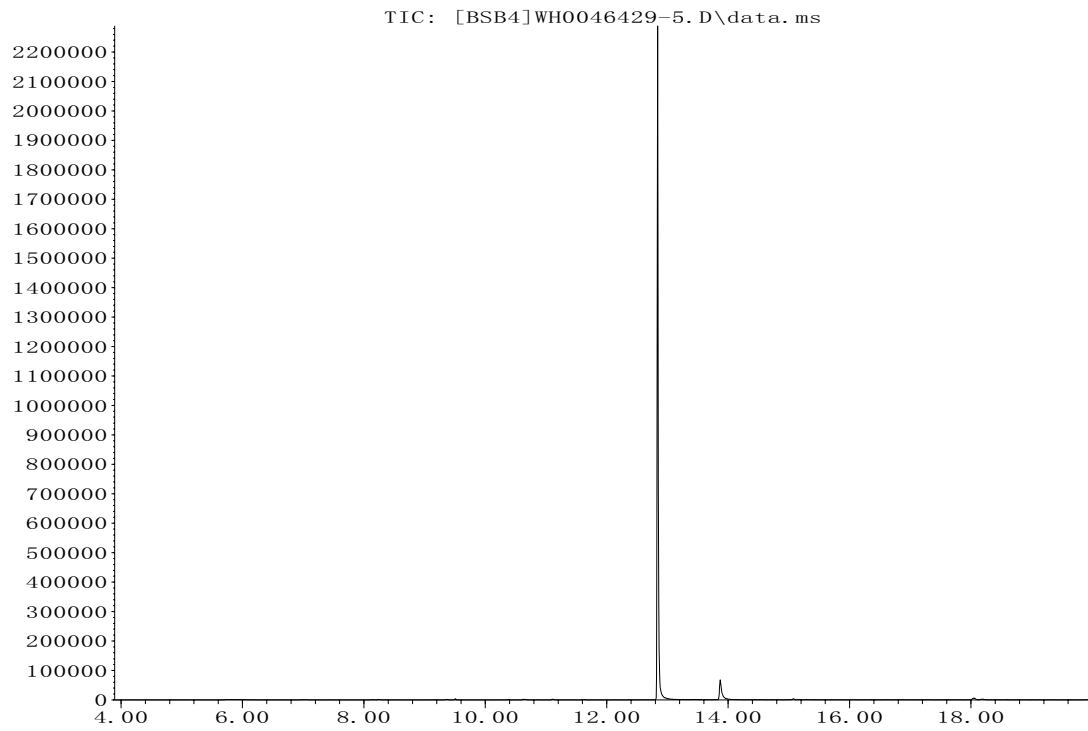

时间-->

丰度

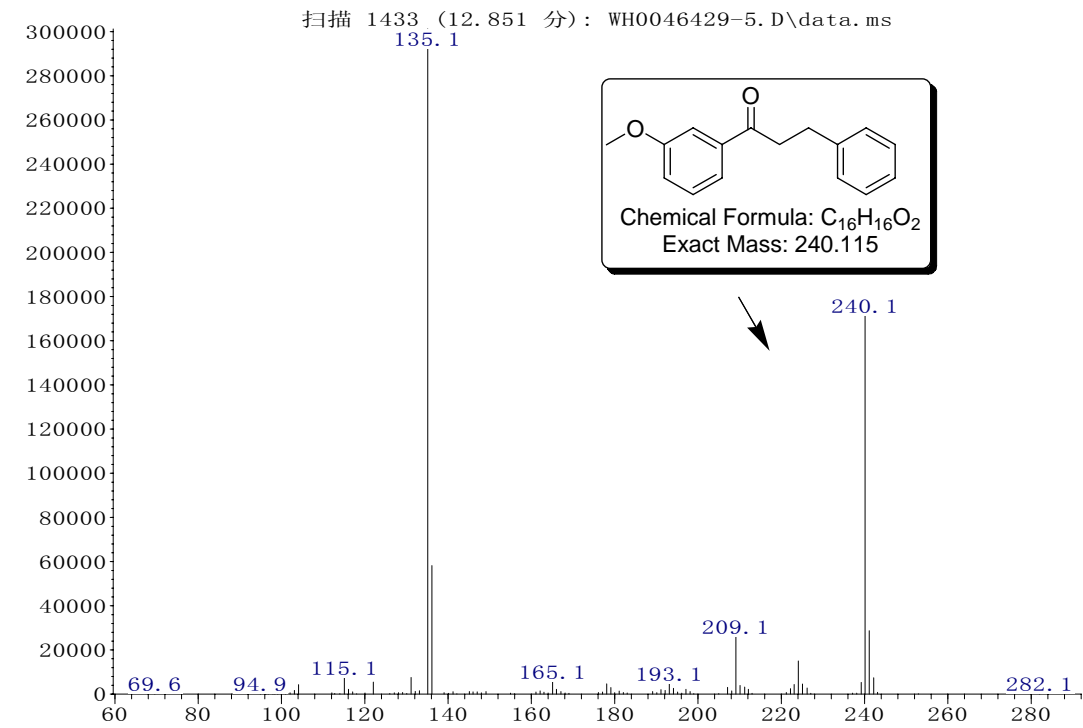

m/z-->

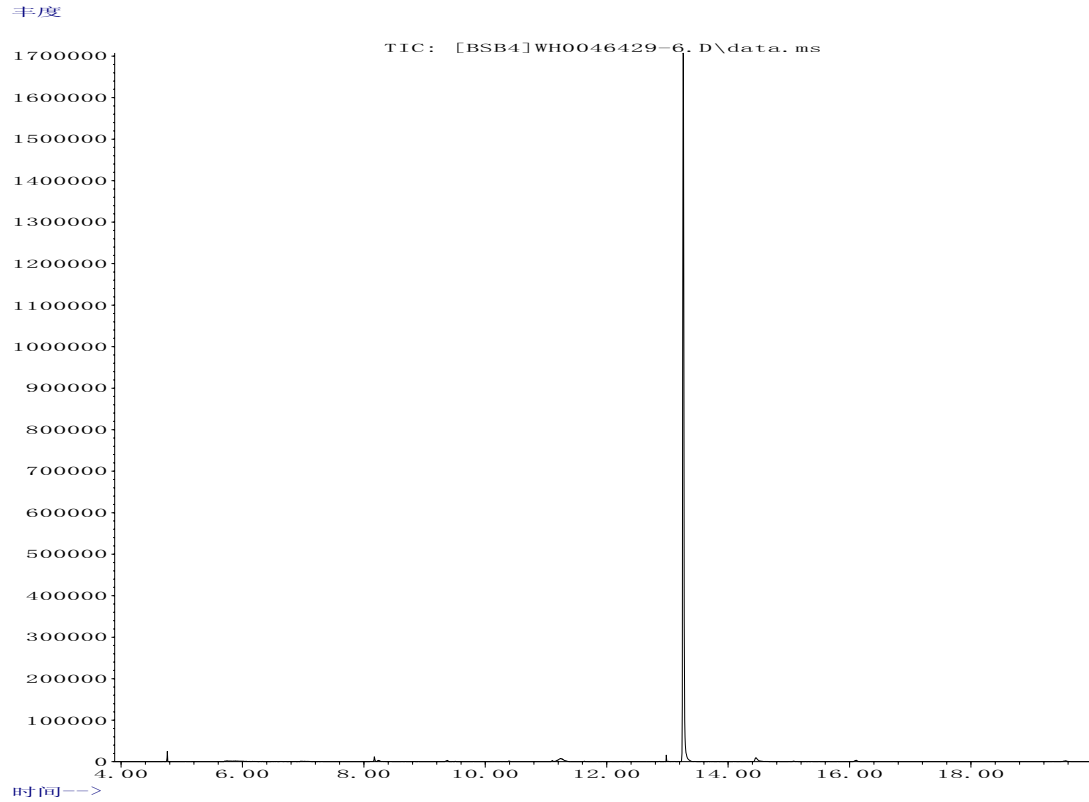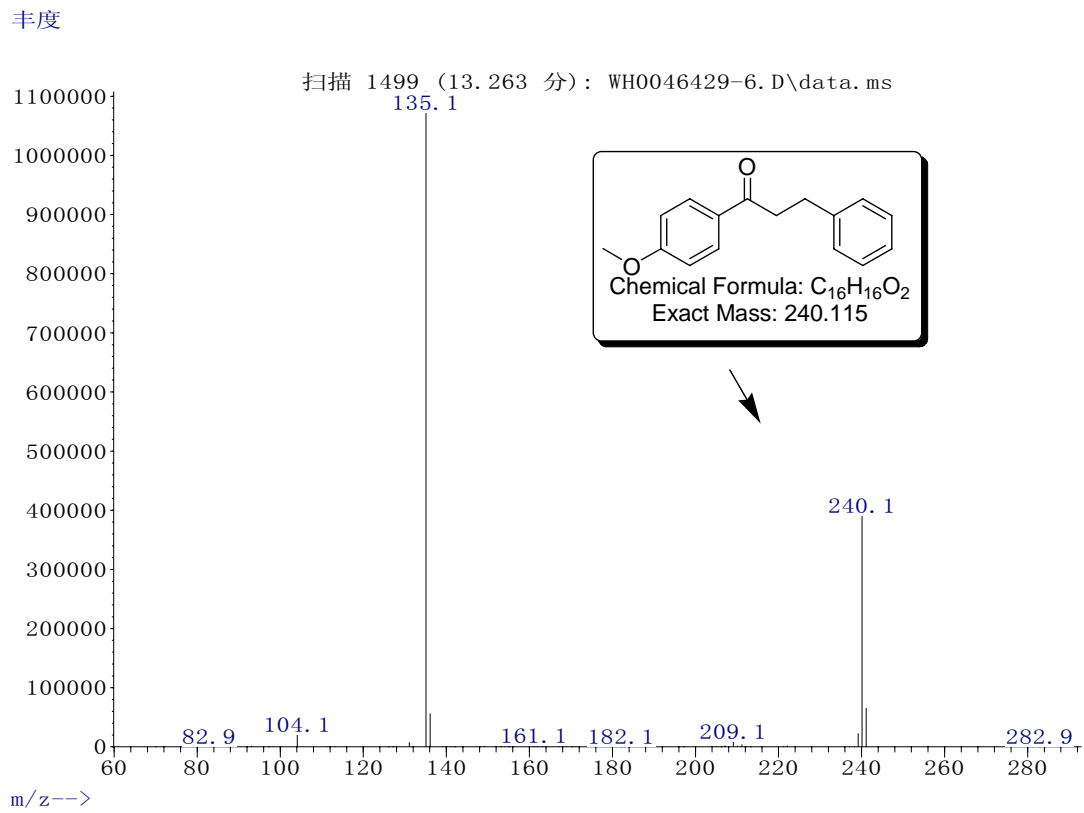

Supplement: c4ra06685e1.pdf [file c4ra06685e1.pdf]
